# Supplementary material
Source: PubMed Central journal article supplement (PMC3567267)
Supplement: mmc1.pdf [file mmc1.pdf]

## Supplemental Information

### Refinement and Discovery of New Hotspots of Copy-Number Variation Associated

### with Autism Spectrum Disorder

Santhosh Girirajan, Megan Y. Dennis, Carl Baker, Maika Malig, Bradley P. Coe, Catarina D. Campbell, Kenneth Mark, Tiffany H. Vu, Can Alkan, Ze Cheng, Leslie G. Biesecker, Raphael Bernier, and Evan E. Eichler

#### Table of Contents

|                                                                                                                                                               |           |
|---------------------------------------------------------------------------------------------------------------------------------------------------------------|-----------|
| <b>SUPPLEMENTARY FIGURES.....</b>                                                                                                                             | <b>2</b>  |
| Figure S1. Definition of hotspot targeted in this study .....                                                                                                 | 2         |
| Figure S2. Size-wise distribution of targeted hotspot regions.....                                                                                            | 3         |
| Figure S3. Identifying smaller hotspot events.....                                                                                                            | 4         |
| Figure S4. CNV detection within targeted regions.....                                                                                                         | 5         |
| Figure S5. A work flow for CNV discovery in the genomic backbone.....                                                                                         | 7         |
| Figure S6. Novel SD-mediated hotspots in children with autism not found in controls.....                                                                      | 8         |
| Figure S7. Autism features in individuals with deletions, duplications, de novo disruptive point mutations, and without any identified CNVs or mutations..... | 10        |
| Figure S8. Pathway and gene functional analysis for the list of genes disrupted by smaller hotspot CNVs.....                                                  | 11        |
| Figure S9. Autism candidate gene CNVs.....                                                                                                                    | 12        |
| Figure S10. Inheritance status of events identified within hotspot regions.....                                                                               | 14        |
| <b>SUPPLEMENTARY TABLES.....</b>                                                                                                                              | <b>15</b> |
| Table S1. Genes surveyed for dosage and breakage within the 1,347 hotspots.....                                                                               | 15        |
| Table S2. Cases and controls.....                                                                                                                             | 15        |
| Table S3. CNVs within SD hotspots.....                                                                                                                        | 16        |
| Table S4. Comparison of head circumferences in individuals with specific CNVs.....                                                                            | 20        |
| Table S5. Relationship between CNV size and proband characteristics.....                                                                                      | 21        |
| Table S6. CNVs within microhotspots.....                                                                                                                      | 22        |
| Table S7. List of CNVs within minihotspots.....                                                                                                               | 32        |
| Table S8. CNVs within AluY hotspots.....                                                                                                                      | 38        |
| Table S9. List of all smaller hotspot CNVs.....                                                                                                               | 51        |
| Table S10. Novel gene-disrupting smaller hotspot events exclusive to autism cases.....                                                                        | 55        |
| Table S11. Exon-disrupting CNVs for autism candidate genes.....                                                                                               | 58        |
| Table S12. List of CNVs identified in the genomic backbone (non-hotspot regions).....                                                                         | 64        |
| <b>REFERENCES.....</b>                                                                                                                                        | <b>81</b> |

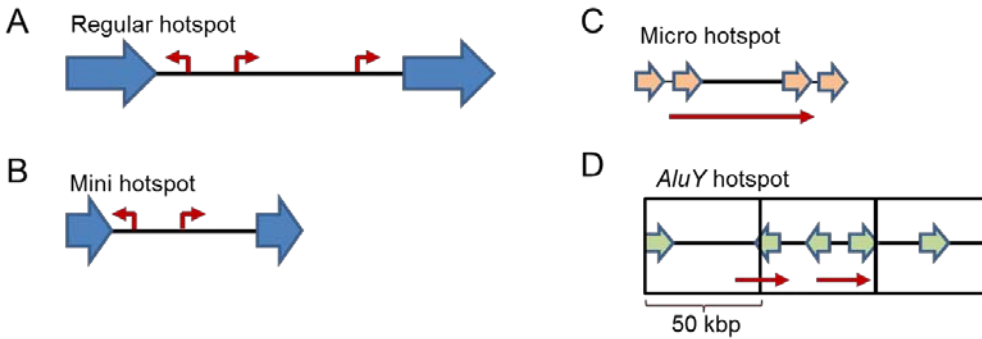

**Figure S1. Definition of hotspots targeted in this study.**

We identified 1,367 regions based on the repeat architecture of the human genome. These regions were classified based on the size and sequence identity of the repeats as follows: **(A) Regular hotspots** (n=120): These regions are flanked by large blocks of segmental duplications (SDs) ( $\geq 10$  kbp in size) with  $\geq 95\%$  in sequence identity with an intervening unique segment ranging between 50 kbp – 5 Mbp. These hotspots were identified by whole-genome assembly comparison (WGAC)<sup>1</sup>. Based on this criteria, 143 redundant hotspots (120 non-overlapping hotspots) mapping within 115 regions were identified<sup>2,3</sup>. These regions were further prioritized, based on disease association, as follows: (i) out of the 115 regions, based on previous association with autism<sup>4</sup>, 18 regions were targeted with very high density of probes; (ii) 52 sites consisted of regions where copy number variants (CNVs) are yet to be discovered; (iii) 28 hotspots were associated with canonical genomic disorders such as Williams syndrome and Smith-Magenis syndrome; and (iv) 17 hotspots are pericentromeric and potentially polymorphic (e.g., *UGT2B*, *SMN*, *PSG*, etc.). **(B) Minihotspots** (n=253): These hotspots were chosen as unique, genic regions (1–100 kbp) that are flanked by smaller ( $\geq 1$ –10 kbp), directly oriented SDs with  $\geq 90\%$  sequence. **(C) Microhotspots** (n=410): A genome-wide scan to identify pairs of 100 bp sequences with perfect (100%) sequence identity (or k-mers) in direct orientation was performed. These 100 bp k-mers were chained, allowing two edit distances, to form sequence pairs  $\geq 199$  bp in size. Unique genic regions (1–100 kbp) flanked by such chained k-mers were defined as microhotspots. **(D) *AluY* hotspots** (n=584): A genome-wide scan was performed with a 50 kbp non-overlapping window for *AluY* and total *Alu* enrichment. (i) Top 260 *AluY*-enriched regions, i.e., with at least 15 kbp of *AluY* elements within the 50 kbp non-overlapping window and containing at least one gene, were chosen. (ii) *AluY* enriched regions (n=74) were identified on chromosome X. (iii) From a genome-wide scan of highly conserved (based on GERP scores<sup>5</sup>) regions, the top 250 sites were chosen that are also enriched for *AluY* repeats within a 50 kbp non-overlapping genomic window. The smaller hotspots were expanded by 5–20 kbp to accommodate at least 10 probes for improved sensitivity of CNV detection. Thus, the targeted size of *AluY* regions is 90 kbp. The block arrows indicate repeat elements (blue=SDs, orange=k-mers, green=*Alu*) and red arrows indicate genes.

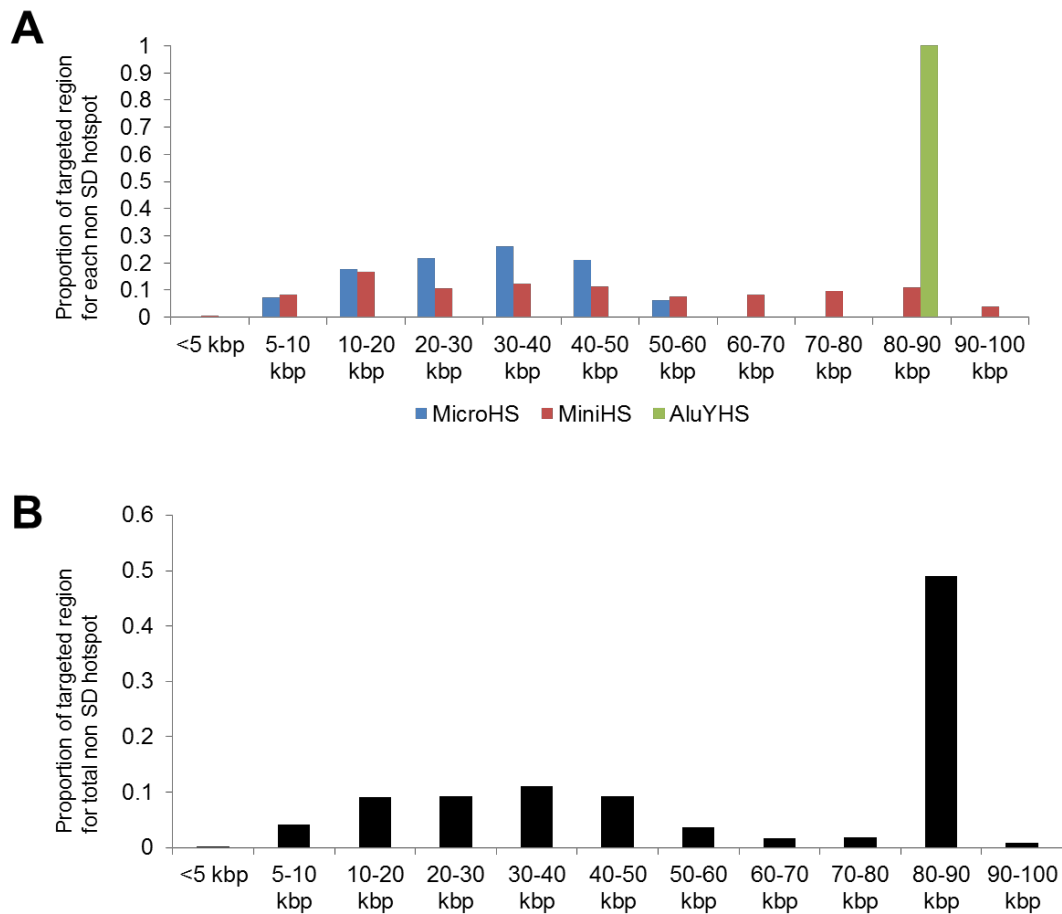

**Figure S2. Size-wise distribution of targeted hotspot regions.**

(A) Sizes of all smaller non-SD ( $n=1,247$ ) hotspots are shown. Note that the hotspot sizes are inclusive of the extra flanks (5–20 kbp) added in the design of the array. Thus, all *AluY* hotspots are 90 kbp in size even though the intended target region is within a 50 kbp window. (B) Sizes of smaller non-SD hotspots as an aggregate are shown. The overall median size of these hotspots is 79 kbp (see Table 1).

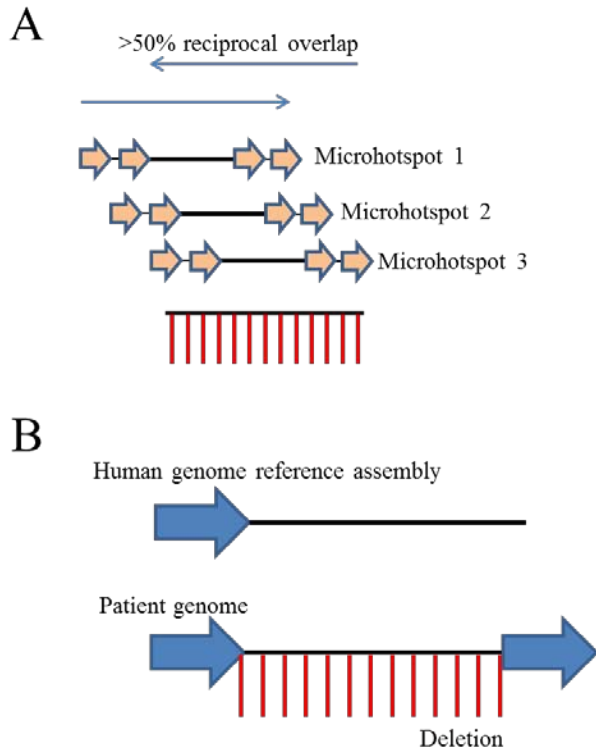

**Figure S3. Identifying smaller hotspot events.**

(A) Events were considered to be mediated by smaller repeats and counted only if the CNV had a reciprocal overlap of 50% or more of its length to the targeted hotspots. In this example, the deletion is mediated by one of the three hotspots, and the exact breakpoint in such cases is not determined. Note that these three hotspots will not be collapsed if they do not conform, collectively, to the definition of microhotspots (allowing for only one edit distance of sequence difference). (B) Since the array was designed based on the human reference genome (Build 36, hg18), we anticipated observing events where the CNV contained an unpaired repeat (SD, chained k-mer or *AluY*) element on only one side of the breakpoint. This suggests the presence of a private, predisposing genomic configuration in that individual that is not annotated in the reference genome assembly. These regions were designated as hotspot-associated events <sup>6</sup>.

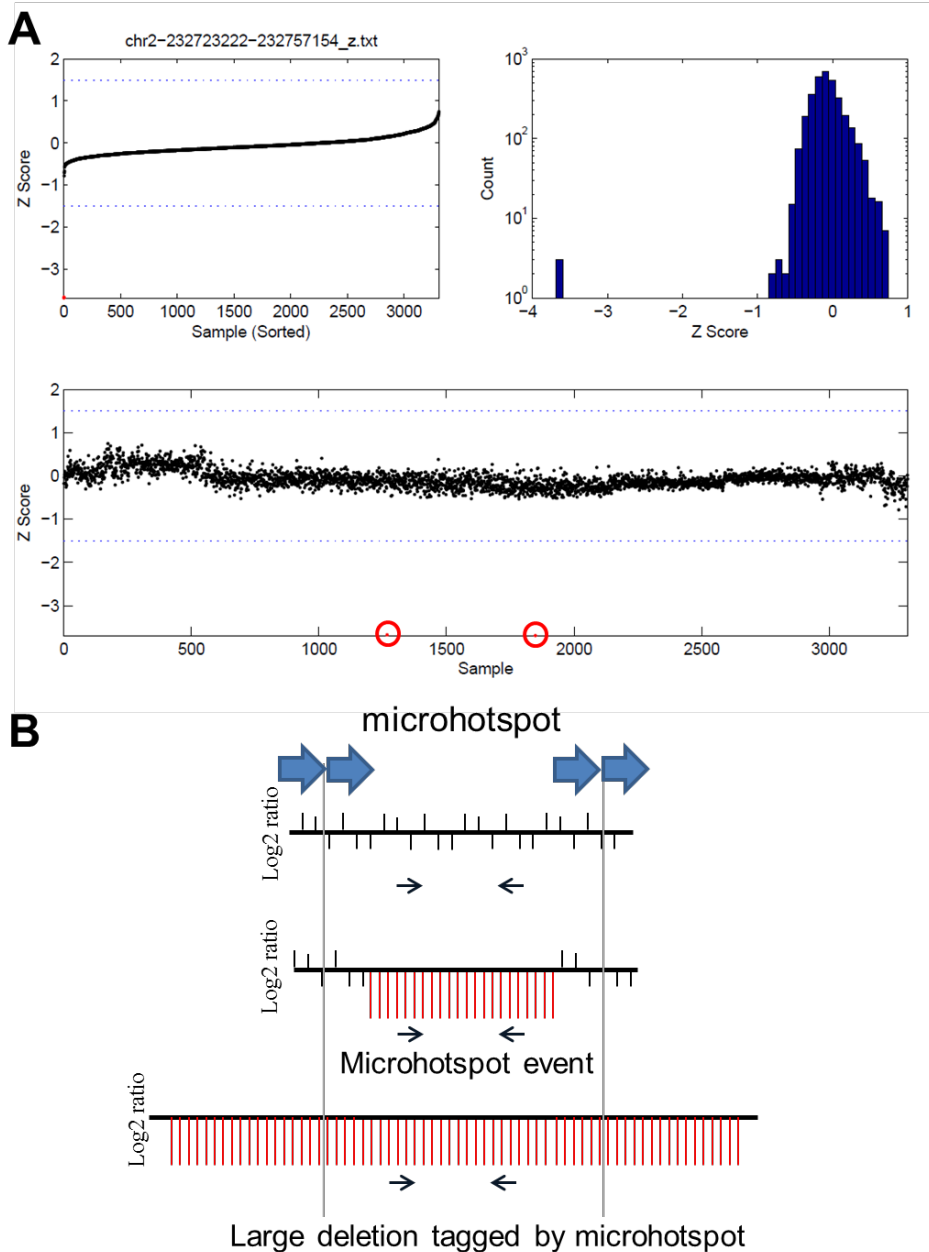

**Figure S4. CNV detection within targeted regions.**

(A) Transformed z-scores for one specific hotspot are shown for all the cases and controls analyzed using the targeted array. Each black dot represents a sample and the red dots represent samples with a z-score  $<-1.5$  (circled in red) and blue dots represent samples with a z-score  $>1.5$  (not shown). The distribution of z-scores is shown as a histogram for all the samples for that particular region. (B) Examples depicting variants within or traversing a microhotspot are shown. Events that are “tagged” by microhotspots are removed by manual inspection and reclassified. If no annotated repeat element is present at the flanks (as defined in this study), these “tagged” events are classified as a backbone event. Targeted genotyping of hotspots and previously implicated autism candidate genes from the SFARI gene database (sfari.org) was performed by calculating the average log intensity ratios for each targeted region. For every targeted region,

the z-score was calculated using the average log intensity ratio and chromosome-specific means and standard deviations<sup>7</sup>. Plots were generated to manually inspect all targeted regions to select samples with an absolute z-score  $\geq 1.5$  (represented as outliers in the plot). This exercise was extended to genotype 2,090 controls but with a much more stringent filter requiring  $\geq 10$  probes to cover a region.

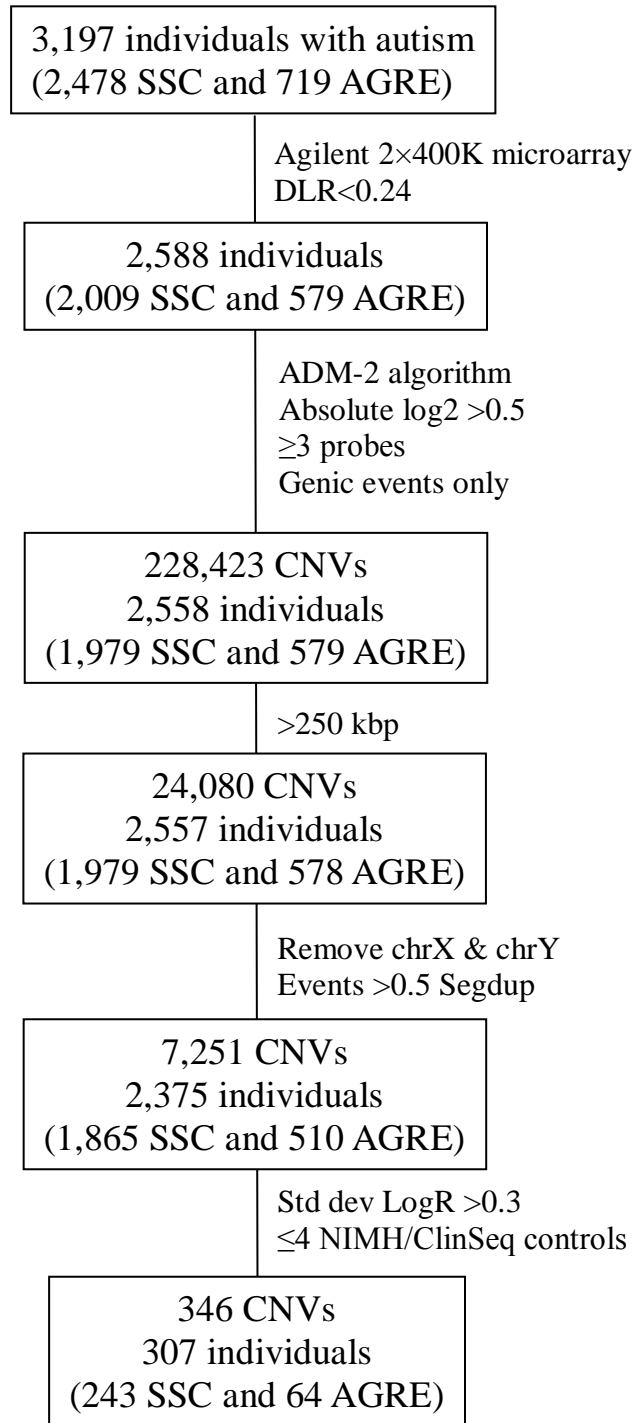

**Figure S5. A work flow for CNV discovery in the genomic backbone.**

Manual curation after loading the log<sub>2</sub> signal intensities into custom UCSC genome browser was also performed to eliminate any false positive calls. Validation was performed by testing parents for inheritance status as well as by hybridization on a custom 135K NimbleGen hotspot array.

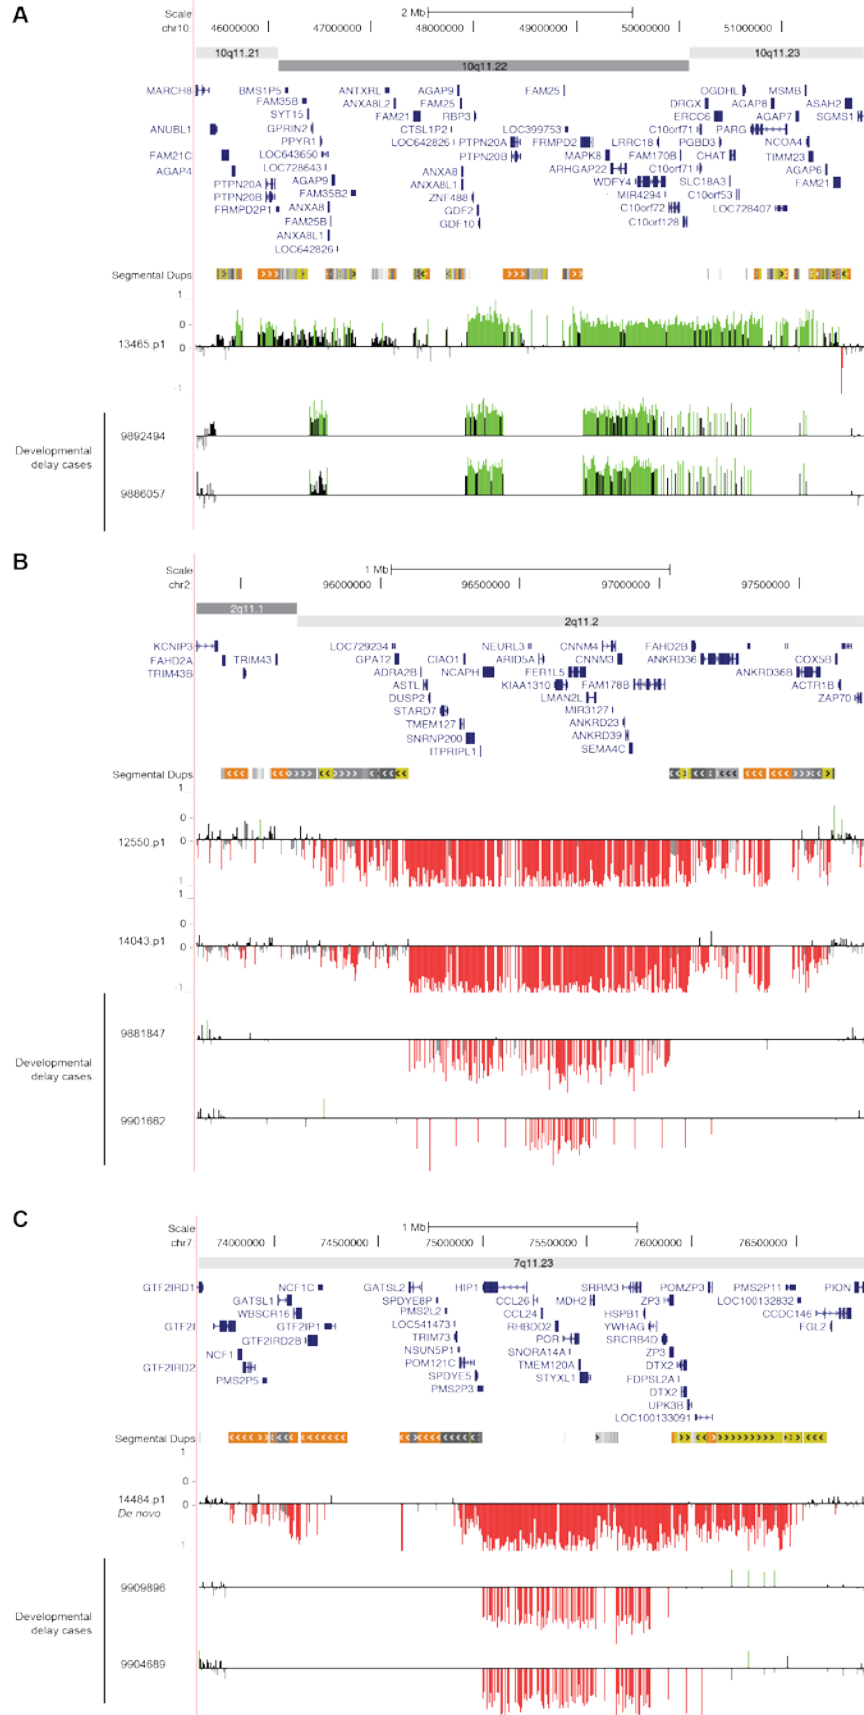



**Figure S6. Novel SD-mediated hotspots in children with autism not found in controls.**

We identified recurrent deletions and duplications of regions not previously reported in children with autism. Events were also found in all regions in children with developmental delay (indicated). From top to bottom, pictured are the human reference genomic coordinates (hg18), chromosome region, genes, SDs, log<sub>2</sub> histograms depicting deletions (red) and duplications (green) for autism, and developmental delay cases. Regions depicted are recurrent **(A)** duplications of 10q11.22, **(B)** deletions 2q11.2, and **(C)** deletions of 7q11.23, distal to the Williams-Beuren syndrome locus.

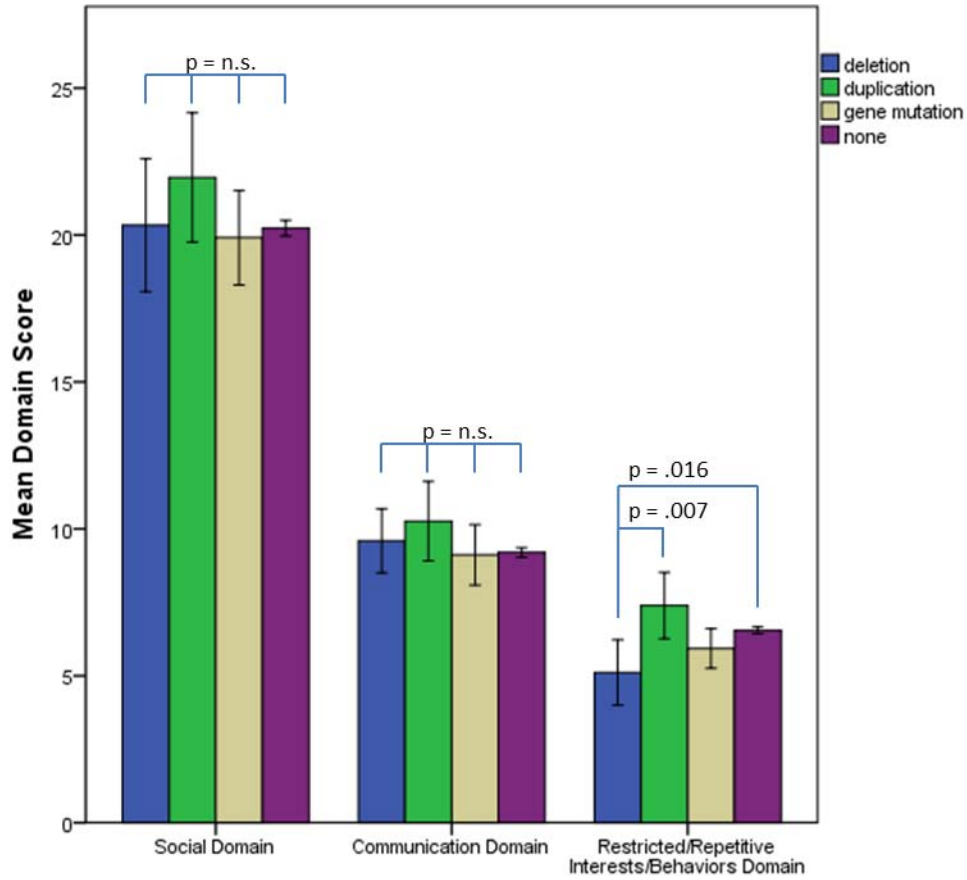

**Figure S7. Autism features in individuals with deletions, duplications, *de novo* disruptive point mutations, and without any identified CNVs or mutations.**

Histograms depict parent-reported autism symptoms across social, communication, and restricted/repetitive interests/behaviors domains for individuals with deletions, duplications, and *de novo* gene-disrupting mutations but without any identified CNVs or mutations.

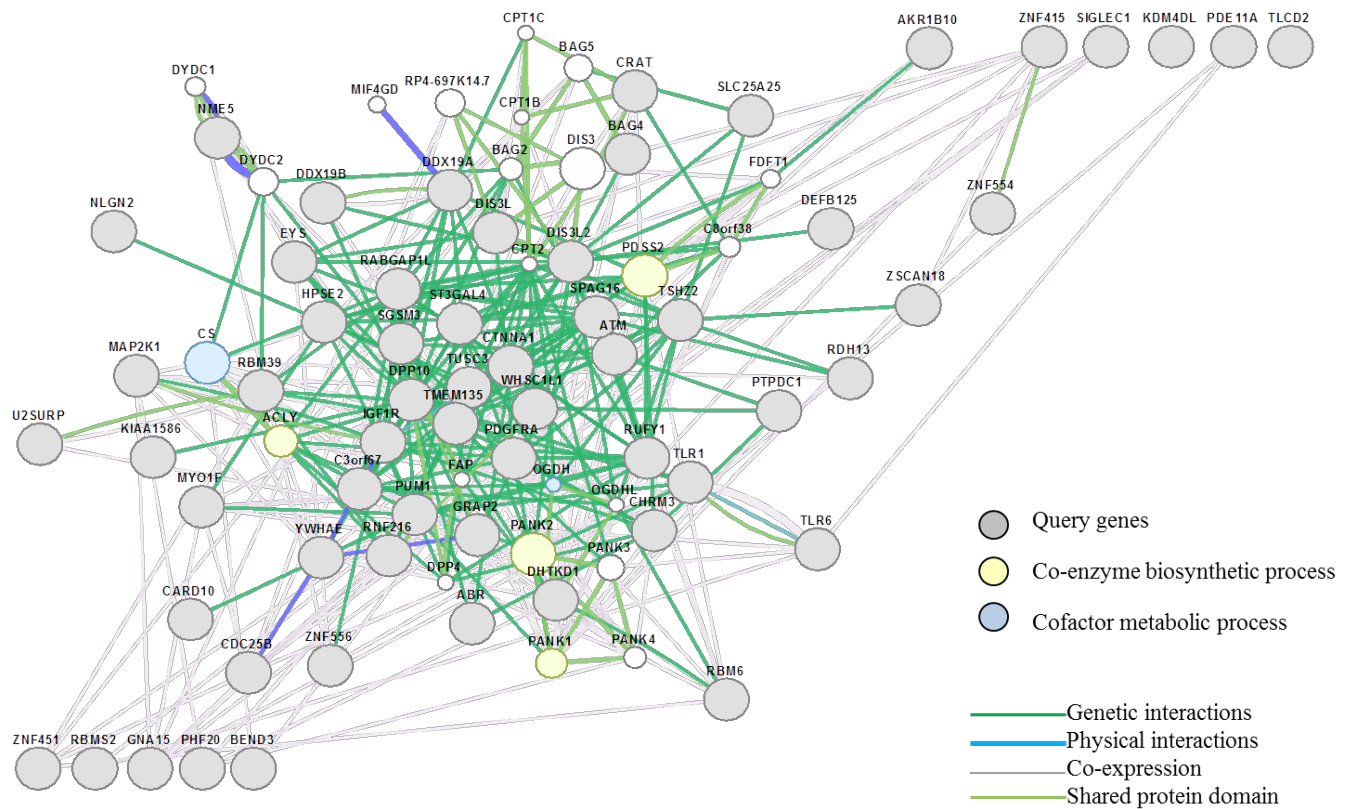

**Figure S8. Pathway and gene functional analysis for the list of genes disrupted by smaller hotspot CNVs.**

GeneMANIA<sup>8</sup> view of all the disrupted genes within smaller hotspot genes is shown.

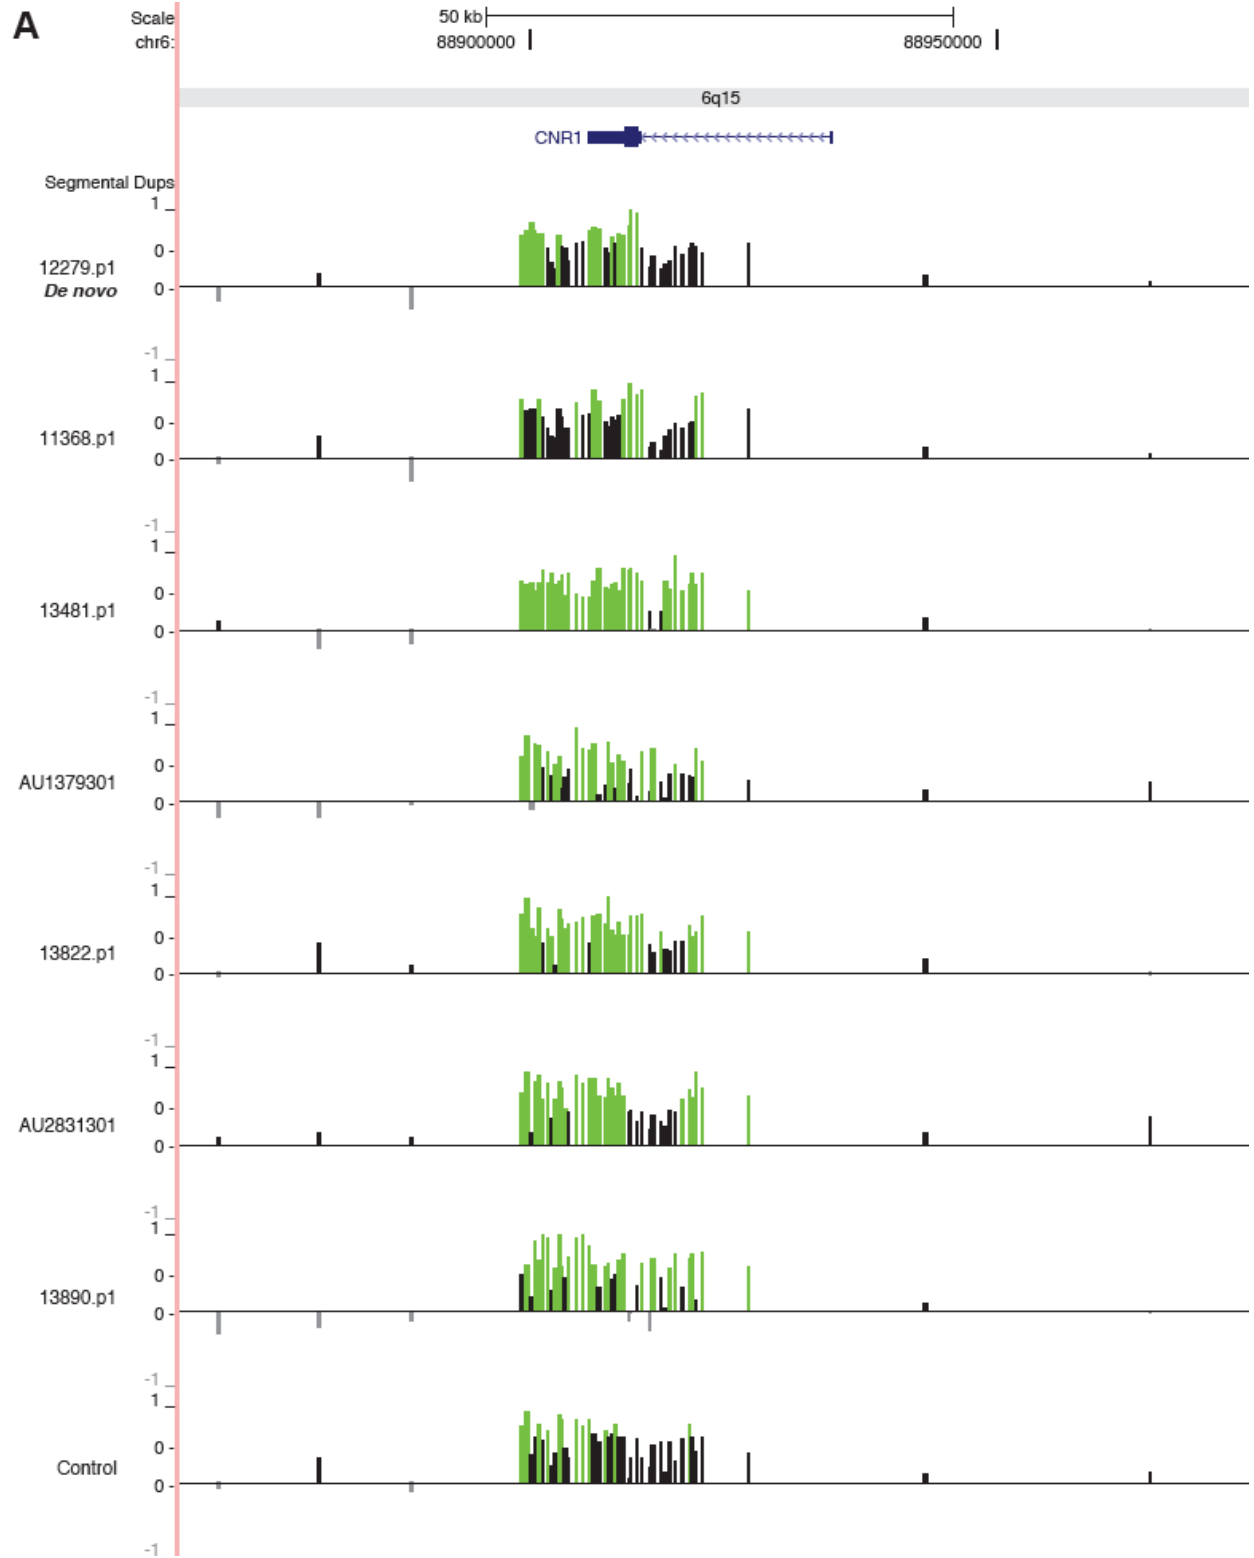

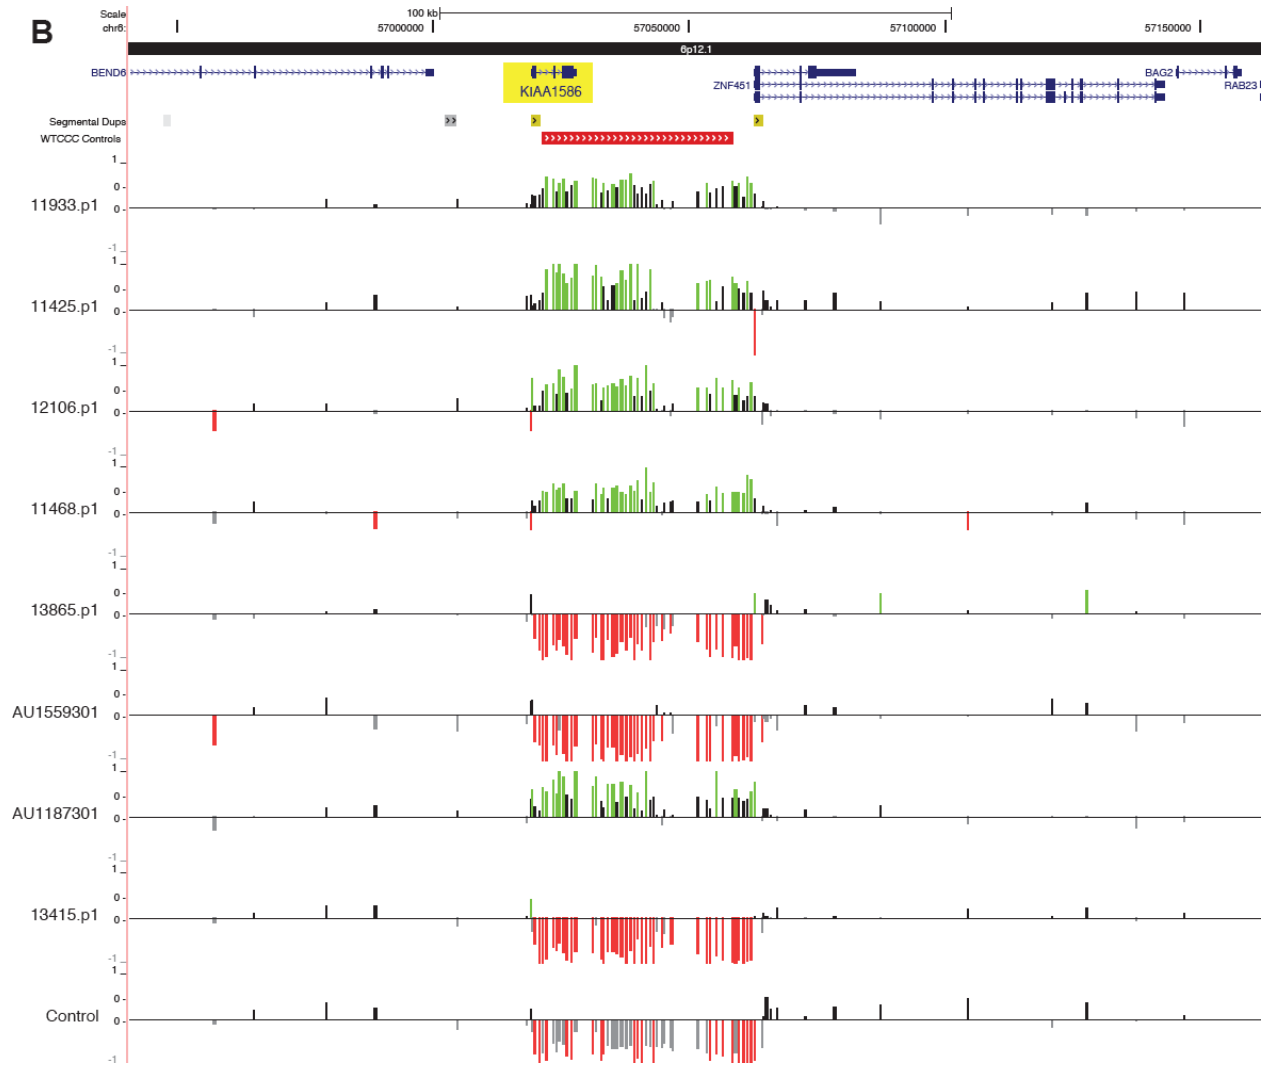

**Figure S9. Autism candidate gene CNVs.**

Pictured are histograms of microarray data representing log<sub>2</sub> ratios of probes with deletions (red) and duplications (blue) depicted for candidate genes: (A) *CNR1* (p=0.032) and (B) *KIAA1586* (p=0.049).

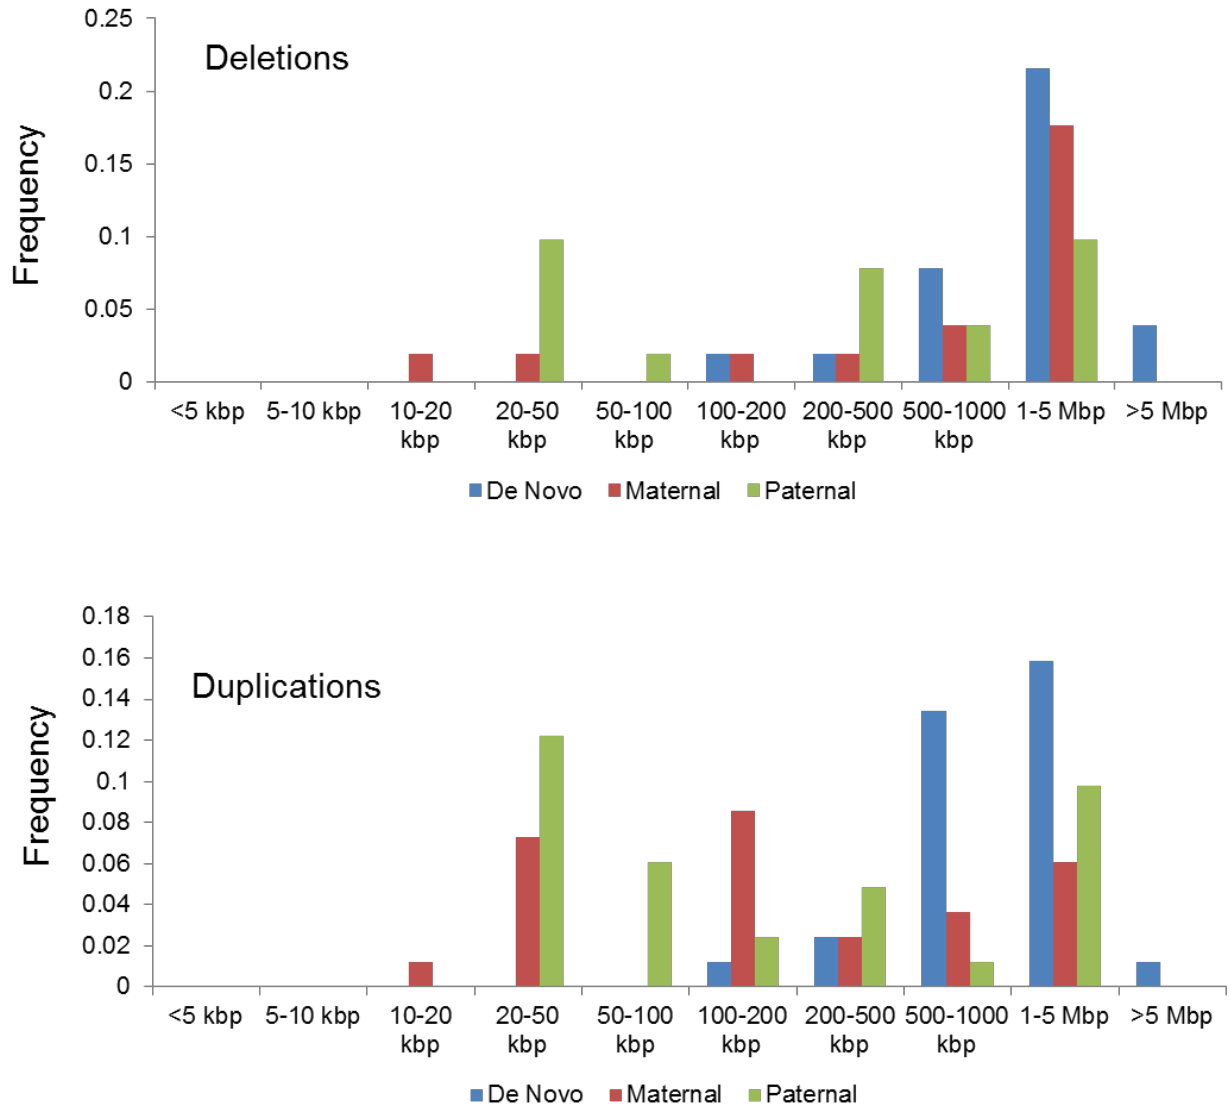

**Figure S10. Inheritance status of events identified within hotspot regions.**

**Table S1. Genes surveyed for dosage and breakage within the 1,347 hotspots**

|            | Breaking the gene    |                |                | Total |
|------------|----------------------|----------------|----------------|-------|
|            | Contained within CNV | 5' end of gene | 3' end of gene |       |
| Regular HS | 2971                 | 32             | 35             | 67    |
| Mini HS    | 143                  | 69             | 76             | 145   |
| Micro HS   | 77                   | 63             | 42             | 105   |
| AluY       | 692                  | 306            | 297            | 603   |
| Total      | 912                  | 438            | 415            | 853   |
| Smaller HS |                      |                |                |       |
| HS Total   | 3883                 | 470            | 450            | 920   |

HS=hotspot

**Table S2. Cases and controls**

| Cohort                                 | Analyzed | Passed QC |
|----------------------------------------|----------|-----------|
| SSC autism                             | 2,478    | 2,009     |
| AGRE autism                            | 719      | 579       |
| NIMH controls                          | 207      | 207       |
| ClinSeq controls                       | 373      | 373       |
| WTCCC controls for targeted genotyping | 2,090    |           |

**Table S3. CNVs within SD hotspots**

| Region          | Genomic coordinates (hg18) | Samples   | CNV | Inheritance | DD CNVs (n=15,767) | Total Case CNVs (n=18,355) | Control CNVs (n=8,329) | P-value  | Odds ratio | Lower 95% CI | Upper 95% CI |
|-----------------|----------------------------|-----------|-----|-------------|--------------------|----------------------------|------------------------|----------|------------|--------------|--------------|
| 1q21.1          | chr1:144825000-146075000   | 12420.p1  | Dup | De novo     | 26                 | 33                         | 1                      | 4.87E-05 | 14.999     | 2.51006      | 608.7073     |
| 1q21.1          | chr1:144825000-146075000   | 12907.p1  | Dup | De Novo     | 26                 | 33                         | 1                      | 4.87E-05 | 14.999     | 2.51006      | 608.7073     |
| 1q21.1          | chr1:144825000-146075000   | 13975.p1  | Dup | De novo     | 26                 | 33                         | 1                      | 4.87E-05 | 14.999     | 2.51006      | 608.7073     |
| 1q21.1          | chr1:144825000-146075000   | AU3144302 | Dup | De novo     | 26                 | 33                         | 1                      | 4.87E-05 | 14.999     | 2.51006      | 608.7073     |
| 11q14.3         | chr11:89070781-89514825    | 13944.p1  | Dup | De novo     | 0                  | 1                          | 0                      | 0.687865 | Inf        | 0.011651     | Inf          |
| 12p11.23        | chr12:27196123-27621264    | 13784.p1  | Dup | De novo     | 4                  | 5                          | 2                      | 0.619403 | 1.134458   | 0.185658     | 11.91711     |
| 15q11.2 - q13.1 | chr15:18432358-26745127    | 12007.p1  | Dup | De novo     | 16                 | 17                         | 0                      | 0.001724 | Inf        | 1.873672     | Inf          |
| 15q13.1         | chr15:26625000-30675000    | 11928.p1  | Dup | De novo     | 4                  | 5                          | 0                      | 0.153973 | Inf        | 0.415833     | Inf          |
| 15q13.1         | chr15:28656923-30232692    | 13301.p1  | Del | De novo     | 42                 | 44                         | 0                      | 6.97E-08 | Inf        | 5.198759     | Inf          |
| 15q13.1         | chr15:28656923-30232692    | 13647.p1  | Del | De novo     | 42                 | 44                         | 0                      | 6.97E-08 | Inf        | 5.198759     | Inf          |
| 15q23-q24.1     | chr15:66890869-71938416    | 11233.p1  | Del | De novo     | 0                  | 1                          | 0                      | 0.687865 | Inf        | 0.011651     | Inf          |
| 16p13.11_12.1   | chr16:15074999-16725000    | 11511.p1  | Dup | De novo     | 24                 | 28                         | 10                     | 0.323242 | 1.270934   | 0.598885     | 2.933867     |
| 16p11.2         | chr16:29425000-30275000    | 11090.p1  | Del | De novo     | 64                 | 70                         | 3                      | 8.48E-09 | 10.62435   | 3.487421     | 52.7974      |
| 16p11.2         | chr16:29425000-30275000    | 11433.p1  | Del | De novo     | 64                 | 70                         | 3                      | 8.48E-09 | 10.62435   | 3.487421     | 52.7974      |
| 16p11.2         | chr16:29425000-30275000    | 11540.p1  | Del | De novo     | 64                 | 70                         | 3                      | 8.48E-09 | 10.62435   | 3.487421     | 52.7974      |
| 16p11.2         | chr16:29425000-30275000    | 12308.p1  | Del | De novo     | 64                 | 70                         | 3                      | 8.48E-09 | 10.62435   | 3.487421     | 52.7974      |
| 16p11.2         | chr16:29425000-            | 12435.p1  | Dup | De novo     | 28                 | 37                         | 2                      | 7.81E-05 | 8.409517   | 2.168339     | 71.89444     |



|                          |                          |          |     |         |    |    |   |          |          |          |          |
|--------------------------|--------------------------|----------|-----|---------|----|----|---|----------|----------|----------|----------|
|                          | 30275000                 |          |     |         |    |    |   |          |          |          |          |
| 16p11.2                  | chr16:29425000-30275000  | 12736.p1 | Dup | De novo | 28 | 37 | 2 | 7.81E-05 | 8.409517 | 2.168339 | 71.89444 |
| 16p11.2                  | chr16:29425000-30275000  | 13335.p1 | Dup | De novo | 28 | 37 | 2 | 7.81E-05 | 8.409517 | 2.168339 | 71.89444 |
| 16p11.2                  | chr16:29425000-30275000  | 13491.p1 | Dup | De novo | 28 | 37 | 2 | 7.81E-05 | 8.409517 | 2.168339 | 71.89444 |
| 16p11.2                  | chr16:29425000-30275000  | 14023.p1 | Dup | De novo | 28 | 37 | 2 | 7.81E-05 | 8.409517 | 2.168339 | 71.89444 |
| 16q22                    | chr16:68859156-72903506  | 12691.p1 | Del | De novo | 0  | 1  | 0 | 0.687865 | Inf      | 0.011651 | Inf      |
| 16q22                    | chr16:68883052-69808186  | 13769.p1 | Dup | De novo | 0  | 1  | 0 | 0.687865 | Inf      | 0.011651 | Inf      |
| CMT1A                    | chr17:14109882-15367164  | 13491.p1 | Dup | De novo | 9  | 12 | 2 | 0.138459 | 2.723681 | 0.606156 | 25.06131 |
| HNPP                     | chr17:14109882-15367164  | 13555.p1 | Del | De novo | 3  | 6  | 0 | 0.105903 | Inf      | 0.534307 | Inf      |
| Potocki-Lupski syndrome  | chr17:15081549-18771879  | 13561.p1 | Dup | De novo | 9  | 10 | 0 | 0.023697 | Inf      | 1.017395 | Inf      |
| 17q12                    | chr17:31355103-33660562  | 11353.p1 | Del | De novo | 14 | 16 | 2 | 0.048292 | 3.631974 | 0.853704 | 32.5675  |
| 2q12.1                   | chr2:103280257-108770547 | 12735.p1 | Del | De novo | 0  | 1  | 0 | 0.687865 | Inf      | 0.011651 | Inf      |
| 22q11.21                 | chr22:16925000-20075000  | 12239.p1 | Del | De novo | 96 | 98 | 0 | 1.10E-16 | Inf      | 11.88983 | Inf      |
| 22q11.21                 | chr22:16925000-20075000  | 13859.p1 | Del | De novo | 96 | 98 | 0 | 1.10E-16 | Inf      | 11.88983 | Inf      |
| 3q29                     | chr3:196789663-198943245 | 13064.p1 | Del | De novo | 6  | 7  | 0 | 0.07284  | Inf      | 0.6541   | Inf      |
| Williams syndrome region | chr7:72220564-73910955   | 12594.p1 | Dup | De novo | 16 | 20 | 0 | 0.000561 | Inf      | 2.241991 | Inf      |
| Williams syndrome region | chr7:72220564-73910955   | AU030804 | Dup | De novo | 16 | 20 | 0 | 0.000561 | Inf      | 2.241991 | Inf      |
| Williams syndrome region | chr7:72385594-73774582   | 11154.p1 | Dup | De novo | 16 | 20 | 0 | 0.000561 | Inf      | 2.241991 | Inf      |

|                          |                          |           |     |          |    |    |    |          |          |          |          |
|--------------------------|--------------------------|-----------|-----|----------|----|----|----|----------|----------|----------|----------|
| distal WBS               | chr7:74603980-76604725   | 14484.p1  | Del | De novo  | 2  | 3  | 0  | 0.325453 | Inf      | 0.187491 | Inf      |
| Williams syndrome region | chr7:74930136-75918119   | 14032.p1  | Dup | De novo  | 0  | 1  | 0  | 0.687865 | Inf      | 0.011651 | Inf      |
| 1q21.1                   | chr1:144103100-144330084 | 14181.p1  | Dup | Maternal | 25 | 26 | 1  | 0.000541 | 11.81294 | 1.939977 | 483.4222 |
| 1q21.1                   | chr1:144825000-146075000 | 13507.p1  | Del | Maternal | 47 | 48 | 2  | 2.04E-06 | 10.91607 | 2.860587 | 92.76115 |
| 1q21.1                   | chr1:144825000-146075000 | 14473.p1  | Dup | Maternal | 26 | 33 | 1  | 4.87E-05 | 14.999   | 2.51006  | 608.7073 |
| 15q13.1                  | chr15:26996715-28157315  | 14074.p1  | Del | Maternal | 2  | 4  | 0  | 0.223856 | Inf      | 0.299537 | Inf      |
| 15q25.3                  | chr15:82625000-83675000  | 11348.p1  | Del | Maternal | 5  | 6  | 0  | 0.105903 | Inf      | 0.534307 | Inf      |
| 16p13.11_12.1            | chr16:14301502-18700753  | AU079803  | Del | Maternal | 6  | 7  | 3  | 0.616996 | 1.058823 | 0.241623 | 6.347529 |
| 16p13.11_12.1            | chr16:15074999-16725000  | 14165.p1  | Dup | Maternal | 24 | 28 | 10 | 0.323242 | 1.270934 | 0.598885 | 2.933867 |
| 16p13.11_12.1            | chr16:15074999-16725000  | AU1039302 | Dup | Maternal | 24 | 28 | 10 | 0.323242 | 1.270934 | 0.598885 | 2.933867 |
| 16p11.2                  | chr16:29425000-30275000  | 12010.p1  | Del | Maternal | 64 | 70 | 3  | 8.48E-09 | 10.62435 | 3.487421 | 52.7974  |
| 16p11.2                  | chr16:29425000-30275000  | 11629.p1  | Dup | Maternal | 28 | 37 | 2  | 7.81E-05 | 8.409517 | 2.168339 | 71.89444 |
| 16p11.2                  | chr16:29425000-30275000  | 12417.p1  | Dup | Maternal | 28 | 37 | 2  | 7.81E-05 | 8.409517 | 2.168339 | 71.89444 |
| 16p11.2                  | chr16:29425000-30275000  | 13487.p1  | Dup | Maternal | 28 | 37 | 2  | 7.81E-05 | 8.409517 | 2.168339 | 71.89444 |
| HNPP                     | chr17:14109882-15367164  | 14491.p1  | Del | Maternal | 3  | 6  | 0  | 0.105903 | Inf      | 0.534307 | Inf      |
| 8p22                     | chr8:12594361-14327206   | 13700.p1  | Dup | Maternal | 0  | 1  | 0  | 0.687865 | Inf      | 0.011651 | Inf      |
| 9p24.3                   | chr9:207823-1674250      | 14349.p1  | Dup | Maternal | 1  | 2  | 0  | 0.473151 | Inf      | 0.085193 | Inf      |
| 9p24.3                   | chr9:207823-316999       | 12590.p1  | Del | Maternal | 3  | 4  | 0  | 0.223856 | Inf      | 0.299537 | Inf      |
| CMT1A                    | chr17:14109882-15367164  | AU070705  | Dup | n/a      | 9  | 12 | 2  | 0.138459 | 2.723681 | 0.606156 | 25.06131 |

|                          |                          |           |     |          |    |    |    |          |          |          |          |
|--------------------------|--------------------------|-----------|-----|----------|----|----|----|----------|----------|----------|----------|
| HNPP                     | chr17:14109882-15367164  | AU3006301 | Del | n/a      | 3  | 6  | 0  | 0.105903 | Inf      | 0.534307 | Inf      |
| Williams syndrome region | chr7:72220564-73910955   | AU022704  | Dup | n/a      | 16 | 20 | 0  | 0.000561 | Inf      | 2.241991 | Inf      |
| 1q21.1                   | chr1:144825000-146075000 | 12265.p1  | Dup | Paternal | 26 | 33 | 1  | 4.87E-05 | 14.999   | 2.51006  | 608.7073 |
| 1q21.1                   | chr1:144825000-146075000 | 12891.p1  | Dup | Paternal | 26 | 33 | 1  | 4.87E-05 | 14.999   | 2.51006  | 608.7073 |
| 10q11.23                 | chr10:49086581-50679930  | 13465.p1  | Dup | Paternal | 2  | 3  | 0  | 0.325453 | Inf      | 0.187491 | Inf      |
| 15q13.1                  | chr15:26996715-28160880  | 13585.p1  | Del | Paternal | 2  | 4  | 0  | 0.223856 | Inf      | 0.299537 | Inf      |
| 15q25.3                  | chr15:82625000-83675000  | 14252.p1  | Dup | Paternal | 1  | 2  | 0  | 0.473151 | Inf      | 0.085193 | Inf      |
| 16p13.11_12.1            | chr16:15074999-16725000  | 11450.p1  | Del | Paternal | 18 | 21 | 3  | 0.032409 | 3.178647 | 0.948773 | 16.64716 |
| 16p13.11_12.1            | chr16:15074999-16725000  | 12861.p1  | Del | Paternal | 18 | 21 | 3  | 0.032409 | 3.178647 | 0.948773 | 16.64716 |
| 16p13.11_12.1            | chr16:15074999-16725000  | 14169.p1  | Del | Paternal | 18 | 21 | 3  | 0.032409 | 3.178647 | 0.948773 | 16.64716 |
| 16p13.11_12.1            | chr16:15074999-16725000  | 13534.p1  | Dup | Paternal | 24 | 28 | 10 | 0.323242 | 1.270934 | 0.598885 | 2.933867 |
| 16p11.2                  | chr16:29425000-30275000  | 13509.p1  | Dup | Paternal | 28 | 37 | 2  | 7.81E-05 | 8.409517 | 2.168339 | 71.89444 |
| 16q22                    | chr16:68832773-70006429  | AU1551302 | Dup | Paternal | 0  | 1  | 0  | 0.687865 | Inf      | 0.011651 | Inf      |
| CMT1A                    | chr17:14109882-15367164  | 13328.p1  | Dup | Paternal | 9  | 12 | 2  | 0.138459 | 2.723681 | 0.606156 | 25.06131 |
| 17q12                    | chr17:31355103-33660562  | 13085.p1  | Del | Paternal | 14 | 16 | 2  | 0.048292 | 3.631974 | 0.853704 | 32.5675  |
| 2q11.2                   | chr2:96113899-97049810   | 12550.p1  | Del | Paternal | 2  | 4  | 0  | 0.223856 | Inf      | 0.299537 | Inf      |
| 2q11.2                   | chr2:96113899-97049810   | 14043.p1  | Del | Paternal | 2  | 4  | 0  | 0.223856 | Inf      | 0.299537 | Inf      |
| 5p15.33                  | chr5:369328-725118       | 12376.p1  | Dup | Paternal | 5  | 6  | 0  | 0.105903 | Inf      | 0.534307 | Inf      |
| 7q36.2                   | chr7:152199145-153299935 | 12185.p1  | Dup | Paternal | 0  | 1  | 0  | 0.687865 | Inf      | 0.011651 | Inf      |

**Table S4. Comparison of head circumferences in individuals with specific CNVs**

| CNVs        | N | Mean  | Std. Deviation | Std. Error Mean | Significance            | Percentile within ASD sample using normed HC z score <sup>a</sup> | Z score within only ASD sample |
|-------------|---|-------|----------------|-----------------|-------------------------|-------------------------------------------------------------------|--------------------------------|
| 1q21.1 dup  | 6 | 1.63  | 0.50           | 0.20            | t=4.176, df=5, p=.009   | 76.1                                                              | 0.71                           |
| 1q21.1 del  | 1 | -0.62 | .              | .               |                         | 16.3                                                              | -0.98                          |
| 16p11.2 dup | 8 | -0.22 | 0.92           | 0.33            | t=-3.565; df=11; p=.004 | 23.6                                                              | -0.72                          |
| 16p11.2 del | 5 | 2.30  | 1.66           | 0.74            |                         | 88.9                                                              | 1.22                           |
| WBS dups    | 3 | 1.58  | 0.84           | 0.48            | t=1.287; df=2; p=.327   | 74.8                                                              | 0.67                           |
| WBS del     | 1 | 0.33  | .              | .               |                         | 39.3                                                              | -0.27                          |

<sup>a</sup>From analysis of 1,962 SSC samples; Mean=0.69, Std. Deviation=1.32.

**Table S5. Relationship between CNV size and proband characteristics**

| <b>Region</b>       | <b>N (with data)</b> | <b>Autism Severity (mean=6.95, sd=1.61)</b> | <b>Nonverbal IQ (mean=81.43, sd=28.15)</b> | <b>Size of the CNV</b> |
|---------------------|----------------------|---------------------------------------------|--------------------------------------------|------------------------|
| <i>Duplications</i> |                      |                                             |                                            |                        |
| 16p11.2             | 9                    | 7.33                                        | 74.22                                      | 555,168                |
| 1q21.1              | 7                    | 7.00                                        | 88.83                                      | 821,359                |
| 16p13.11            | 3                    | 6.33                                        | 108.33                                     | 790,319                |
| WBS                 | 3                    | 7.67                                        | 75.00                                      | 1,400,792              |
| 15q11.2q13          | 1                    | <b>10.00 (z=1.89)</b>                       | 54.00                                      | 3,730,036              |
| 17p12               | 0                    | No Data                                     | No Data                                    |                        |
| 16p12.1             | 0                    | No Data                                     | No Data                                    |                        |
| 15q13.3             | 0                    | No Data                                     | No Data                                    |                        |
| <i>Deletions</i>    |                      |                                             |                                            |                        |
| 16p11.2             | 6                    | 6.67                                        | 80.00                                      | 555,168                |
| 15q13.3             | 6                    | 6.50                                        | 103.50                                     | 1,344,798              |
| 16p13.11            | 5                    | 6.00                                        | 72.60                                      | 790,319                |
| 17p12               | 0                    | No Data                                     | No Data                                    |                        |
| 17p13.3             | 0                    | No Data                                     | No Data                                    |                        |
| 17q12               | 3                    | 6.67                                        | 90.67                                      | 1,415,741              |
| 1q21.1              | 2                    | 8.00                                        | 78.50                                      | 821,359                |
| 2q23.1              | 3                    | 7.33                                        | 79.00                                      | 570,781                |
| 3q29                | 2                    | 6.00                                        | 67.50                                      | 1,616,303              |
| DiGeorge/VCFS       | 5                    | 7.00                                        | 95.60                                      | 1,273,719              |
| Phelan-McDermid     | 4                    | 6.25                                        | <b>51.00 (z=-1.08)</b>                     | <b>8,184,170</b>       |
| 15q24               | 0                    | No Data                                     | No Data                                    |                        |
| 15q25.2q25.3        | 1                    | 8.00                                        | 84.00                                      | 661,819                |
| 16p12.1             | 0                    | No Data                                     | No Data                                    |                        |
| 19p13.12            | 2                    | 8.00                                        | <b>110.00 (z=1.01)</b>                     | <b>3,617,438</b>       |
| 9q34                | 1                    | 6.00                                        | <b>34.00 (z=-1.68)</b>                     | <b>3,254,880</b>       |

Note: Bolded items indicate >1 sd (standard deviation) difference from mean. N is number of samples with available phenotypic data.

The table presents average severity and NVIQ data for each region identified in Figure 1. For several regions there are no participants with phenotype data. The mean severity and NVIQ for all participants in these regions are presented. Those regions with average scores greater than or less than one standard deviation from the mean are bolded.

**Table S6. CNVs within microhotspots**

| chr   | start     | end       | CNV counts overlapping with microhotspot |
|-------|-----------|-----------|------------------------------------------|
| chr1  | 7364271   | 7395148   | 0                                        |
| chr1  | 8976823   | 9005092   | 0                                        |
| chr1  | 48517241  | 48551805  | 0                                        |
| chr1  | 70123903  | 70146782  | 0                                        |
| chr1  | 75615354  | 75621731  | 0                                        |
| chr1  | 91610085  | 91630324  | 0                                        |
| chr1  | 117100144 | 117102740 | 0                                        |
| chr1  | 117100486 | 117103082 | 0                                        |
| chr1  | 151295641 | 151310022 | 0                                        |
| chr1  | 152231482 | 152274169 | 0                                        |
| chr1  | 152552014 | 152561190 | 0                                        |
| chr1  | 153186191 | 153189030 | 0                                        |
| chr1  | 155335552 | 155372086 | 0                                        |
| chr1  | 172828150 | 172865894 | 0                                        |
| chr1  | 172828372 | 172866119 | 0                                        |
| chr1  | 172829309 | 172867087 | 0                                        |
| chr1  | 172830878 | 172868674 | 0                                        |
| chr1  | 172848824 | 172866877 | 0                                        |
| chr1  | 172870327 | 172874539 | 0                                        |
| chr1  | 177431856 | 177437100 | 0                                        |
| chr1  | 178538364 | 178572179 | 0                                        |
| chr1  | 178538772 | 178572497 | 0                                        |
| chr1  | 184184053 | 184189911 | 0                                        |
| chr1  | 237853754 | 237868301 | 0                                        |
| chr1  | 237854606 | 237869118 | 0                                        |
| chr1  | 242722735 | 242753992 | 0                                        |
| chr1  | 244836101 | 244865464 | 0                                        |
| chr1  | 244837037 | 244866471 | 0                                        |
| chr1  | 246530714 | 246557246 | 0                                        |
| chr10 | 53463684  | 53469260  | 0                                        |
| chr10 | 59981745  | 59983758  | 0                                        |
| chr10 | 60617824  | 60631115  | 0                                        |
| chr10 | 74423617  | 74455521  | 0                                        |
| chr10 | 74510721  | 74512838  | 0                                        |
| chr10 | 100533137 | 100552776 | 0                                        |
| chr10 | 100738654 | 100765039 | 0                                        |
| chr10 | 103259025 | 103267954 | 0                                        |
| chr10 | 134985485 | 135031148 | 0                                        |
| chr11 | 6123628   | 6165548   | 0                                        |

|       |           |           |   |
|-------|-----------|-----------|---|
| chr11 | 6123970   | 6165874   | 0 |
| chr11 | 14134479  | 14147785  | 0 |
| chr11 | 14827088  | 14861496  | 0 |
| chr11 | 14827370  | 14861771  | 0 |
| chr11 | 33681701  | 33686085  | 0 |
| chr11 | 59963321  | 59998246  | 0 |
| chr11 | 69864582  | 69869185  | 0 |
| chr11 | 84395963  | 84401047  | 0 |
| chr11 | 86631362  | 86659107  | 0 |
| chr11 | 118054345 | 118067684 | 0 |
| chr11 | 123391562 | 123399345 | 0 |
| chr11 | 123757591 | 123771834 | 0 |
| chr11 | 123757834 | 123772109 | 0 |
| chr11 | 123880681 | 123929802 | 0 |
| chr12 | 38471546  | 38516911  | 0 |
| chr12 | 38471797  | 38517249  | 0 |
| chr12 | 51150568  | 51170218  | 0 |
| chr12 | 51153333  | 51173133  | 0 |
| chr12 | 53075478  | 53077856  | 0 |
| chr12 | 69547965  | 69558250  | 0 |
| chr12 | 99400990  | 99433443  | 0 |
| chr12 | 123469020 | 123472484 | 0 |
| chr13 | 24299655  | 24340623  | 0 |
| chr13 | 42978565  | 43004019  | 0 |
| chr13 | 69259989  | 69285049  | 0 |
| chr13 | 75182543  | 75201583  | 0 |
| chr13 | 112491063 | 112492472 | 0 |
| chr13 | 112769490 | 112771413 | 0 |
| chr13 | 112769764 | 112771559 | 0 |
| chr13 | 112770051 | 112771436 | 0 |
| chr14 | 22929079  | 22959287  | 0 |
| chr14 | 23543760  | 23588920  | 0 |
| chr15 | 47435042  | 47477114  | 0 |
| chr15 | 47435962  | 47477982  | 0 |
| chr15 | 47436231  | 47478198  | 0 |
| chr15 | 47436583  | 47478625  | 0 |
| chr15 | 47437256  | 47479238  | 0 |
| chr15 | 47437817  | 47479786  | 0 |
| chr15 | 47439033  | 47481054  | 0 |
| chr15 | 51576574  | 51624618  | 0 |
| chr15 | 69175228  | 69214481  | 0 |

|       |          |          |   |
|-------|----------|----------|---|
| chr15 | 79288589 | 79308826 | 0 |
| chr15 | 86882379 | 86890362 | 0 |
| chr15 | 88199427 | 88213677 | 0 |
| chr15 | 97735681 | 97776759 | 0 |
| chr16 | 143252   | 154715   | 0 |
| chr16 | 159495   | 164074   | 0 |
| chr16 | 159922   | 164398   | 0 |
| chr16 | 159922   | 164516   | 0 |
| chr16 | 3042772  | 3062645  | 0 |
| chr16 | 3043582  | 3063493  | 0 |
| chr16 | 22811888 | 22816741 | 0 |
| chr16 | 31200976 | 31228116 | 0 |
| chr16 | 60374504 | 60394122 | 0 |
| chr16 | 60374941 | 60394557 | 0 |
| chr16 | 60376426 | 60396086 | 0 |
| chr16 | 60376719 | 60397072 | 0 |
| chr16 | 60377692 | 60397860 | 0 |
| chr16 | 60378807 | 60398526 | 0 |
| chr16 | 65526299 | 65539554 | 0 |
| chr17 | 422781   | 449731   | 0 |
| chr17 | 10346988 | 10374106 | 0 |
| chr17 | 36456710 | 36469798 | 0 |
| chr17 | 36469492 | 36475654 | 0 |
| chr17 | 38257155 | 38273328 | 0 |
| chr17 | 38261925 | 38280009 | 0 |
| chr17 | 38525490 | 38562663 | 0 |
| chr17 | 42830670 | 42853654 | 0 |
| chr18 | 22073182 | 22094166 | 0 |
| chr18 | 45827188 | 45865368 | 0 |
| chr18 | 75132722 | 75146377 | 0 |
| chr19 | 5782575  | 5795118  | 0 |
| chr19 | 5782620  | 5818001  | 0 |
| chr19 | 5794889  | 5817965  | 0 |
| chr19 | 8875565  | 8878756  | 0 |
| chr19 | 10135596 | 10138605 | 0 |
| chr19 | 11888320 | 11929833 | 0 |
| chr19 | 11901548 | 11941690 | 0 |
| chr19 | 21461011 | 21485491 | 0 |
| chr19 | 23335331 | 23336464 | 0 |
| chr19 | 42334457 | 42368355 | 0 |
| chr19 | 42334724 | 42368667 | 0 |



|       |           |           |   |
|-------|-----------|-----------|---|
| chr19 | 46945194  | 46984233  | 0 |
| chr19 | 46945520  | 46984672  | 0 |
| chr19 | 46945876  | 46984961  | 0 |
| chr19 | 50366996  | 50368560  | 0 |
| chr19 | 51402994  | 51419041  | 0 |
| chr19 | 58291427  | 58321626  | 0 |
| chr19 | 58291886  | 58322334  | 0 |
| chr19 | 58570764  | 58597264  | 0 |
| chr19 | 61648068  | 61649205  | 0 |
| chr19 | 62409873  | 62453240  | 0 |
| chr19 | 63024549  | 63055549  | 0 |
| chr19 | 63655559  | 63671398  | 0 |
| chr19 | 63658985  | 63674864  | 0 |
| chr2  | 33253017  | 33278697  | 0 |
| chr2  | 47180932  | 47189002  | 0 |
| chr2  | 98965844  | 98989349  | 0 |
| chr2  | 135881357 | 135890782 | 0 |
| chr2  | 141508628 | 141518911 | 0 |
| chr2  | 144111946 | 144141073 | 0 |
| chr2  | 144112266 | 144141464 | 0 |
| chr2  | 158084022 | 158113015 | 0 |
| chr2  | 158084244 | 158113218 | 0 |
| chr2  | 160056200 | 160060196 | 0 |
| chr2  | 160564161 | 160613887 | 0 |
| chr2  | 171181026 | 171184176 | 0 |
| chr2  | 178423694 | 178431616 | 0 |
| chr2  | 178424123 | 178432060 | 0 |
| chr2  | 185138588 | 185181127 | 0 |
| chr2  | 187938931 | 187948270 | 0 |
| chr2  | 201867609 | 201877336 | 0 |
| chr2  | 218608123 | 218642503 | 0 |
| chr2  | 232953667 | 232982184 | 0 |
| chr2  | 232954104 | 232982388 | 0 |
| chr2  | 236959540 | 236983723 | 0 |
| chr2  | 240617916 | 240633955 | 0 |
| chr20 | 51523021  | 51554524  | 0 |
| chr20 | 51523382  | 51554819  | 0 |
| chr20 | 51524227  | 51555673  | 0 |
| chr20 | 51527055  | 51558726  | 0 |
| chr21 | 44818451  | 44845630  | 0 |
| chr21 | 45195222  | 45196532  | 0 |

|       |           |           |   |
|-------|-----------|-----------|---|
| chr22 | 29217699  | 29251694  | 0 |
| chr22 | 37763827  | 37800887  | 0 |
| chr22 | 47355632  | 47366768  | 0 |
| chr3  | 13975593  | 14008330  | 0 |
| chr3  | 16972149  | 16982369  | 0 |
| chr3  | 40236388  | 40256174  | 0 |
| chr3  | 58807688  | 58815903  | 0 |
| chr3  | 99334315  | 99370532  | 0 |
| chr3  | 113078632 | 113096190 | 0 |
| chr3  | 122505180 | 122517007 | 0 |
| chr3  | 125568579 | 125569666 | 0 |
| chr3  | 131440186 | 131456384 | 0 |
| chr3  | 132562425 | 132582402 | 0 |
| chr3  | 132797905 | 132837629 | 0 |
| chr3  | 136204564 | 136230131 | 0 |
| chr3  | 136204866 | 136230393 | 0 |
| chr3  | 136206054 | 136231649 | 0 |
| chr3  | 136455683 | 136483609 | 0 |
| chr3  | 143574634 | 143580161 | 0 |
| chr3  | 172082382 | 172128964 | 0 |
| chr3  | 189984770 | 189985788 | 0 |
| chr3  | 189984821 | 189985970 | 0 |
| chr4  | 26216166  | 26261075  | 0 |
| chr4  | 70928350  | 70950564  | 0 |
| chr4  | 81078567  | 81108348  | 0 |
| chr4  | 81079160  | 81108741  | 0 |
| chr4  | 81079897  | 81109455  | 0 |
| chr4  | 81080267  | 81110214  | 0 |
| chr4  | 81081026  | 81110830  | 0 |
| chr4  | 81081646  | 81111182  | 0 |
| chr4  | 81082017  | 81111928  | 0 |
| chr4  | 81082755  | 81112327  | 0 |
| chr4  | 81083143  | 81112586  | 0 |
| chr4  | 81083400  | 81113020  | 0 |
| chr4  | 87280465  | 87312728  | 0 |
| chr4  | 90035826  | 90065368  | 0 |
| chr4  | 94733589  | 94753051  | 0 |
| chr4  | 94749620  | 94779906  | 0 |
| chr4  | 94750735  | 94780976  | 0 |
| chr4  | 94751238  | 94781463  | 0 |
| chr4  | 94751464  | 94781681  | 0 |

|      |           |           |   |
|------|-----------|-----------|---|
| chr4 | 94751739  | 94782002  | 0 |
| chr4 | 94753601  | 94783808  | 0 |
| chr4 | 165242758 | 165284068 | 0 |
| chr4 | 165244301 | 165285561 | 0 |
| chr4 | 184478009 | 184480485 | 0 |
| chr5 | 11724567  | 11729088  | 0 |
| chr5 | 43641104  | 43651008  | 0 |
| chr5 | 140188720 | 140202246 | 0 |
| chr5 | 140456670 | 140462803 | 0 |
| chr5 | 140517413 | 140561507 | 0 |
| chr5 | 140537787 | 140574332 | 0 |
| chr5 | 140538286 | 140574571 | 0 |
| chr5 | 140548722 | 140585108 | 0 |
| chr5 | 140553938 | 140561372 | 0 |
| chr5 | 140553938 | 140585108 | 0 |
| chr5 | 140561151 | 140585102 | 0 |
| chr5 | 140584905 | 140607233 | 0 |
| chr5 | 140705710 | 140735978 | 0 |
| chr5 | 140711652 | 140721853 | 0 |
| chr5 | 140747591 | 140758328 | 0 |
| chr5 | 156017294 | 156025739 | 0 |
| chr5 | 156017528 | 156026339 | 0 |
| chr5 | 167901028 | 167933856 | 0 |
| chr5 | 169574284 | 169600754 | 0 |
| chr5 | 170418132 | 170444346 | 0 |
| chr5 | 170419582 | 170445669 | 0 |
| chr6 | 3099938   | 3122867   | 0 |
| chr6 | 3101155   | 3124985   | 0 |
| chr6 | 3101686   | 3125544   | 0 |
| chr6 | 3122411   | 3170825   | 0 |
| chr6 | 3122657   | 3171036   | 0 |
| chr6 | 16722062  | 16723535  | 0 |
| chr6 | 26476890  | 26514705  | 0 |
| chr6 | 29650348  | 29664610  | 0 |
| chr6 | 31891506  | 31905415  | 0 |
| chr6 | 35212306  | 35213386  | 0 |
| chr6 | 44947756  | 44962098  | 0 |
| chr6 | 44962221  | 44977866  | 0 |
| chr6 | 57019532  | 57064336  | 0 |
| chr6 | 64848481  | 64860922  | 0 |
| chr6 | 64848726  | 64861129  | 0 |

|      |           |           |   |
|------|-----------|-----------|---|
| chr6 | 69459326  | 69464703  | 0 |
| chr6 | 72041915  | 72085031  | 0 |
| chr6 | 119459218 | 119499070 | 0 |
| chr6 | 123808102 | 123840182 | 0 |
| chr6 | 125651768 | 125684597 | 0 |
| chr7 | 14288126  | 14322660  | 0 |
| chr7 | 14288389  | 14322865  | 0 |
| chr7 | 14289503  | 14324024  | 0 |
| chr7 | 34805846  | 34823910  | 0 |
| chr7 | 38245643  | 38265928  | 0 |
| chr7 | 38246008  | 38266313  | 0 |
| chr7 | 38246333  | 38266728  | 0 |
| chr7 | 65737838  | 65775229  | 0 |
| chr7 | 65738122  | 65775444  | 0 |
| chr7 | 65738736  | 65776215  | 0 |
| chr7 | 83547822  | 83589191  | 0 |
| chr7 | 86489826  | 86530372  | 0 |
| chr7 | 88323782  | 88341905  | 0 |
| chr7 | 92792961  | 92814821  | 0 |
| chr7 | 103947905 | 103987846 | 0 |
| chr7 | 103948143 | 103988091 | 0 |
| chr7 | 133873079 | 133912213 | 0 |
| chr7 | 146238702 | 146261723 | 0 |
| chr7 | 147276949 | 147280392 | 0 |
| chr7 | 148885320 | 148926792 | 0 |
| chr7 | 148937414 | 148971628 | 0 |
| chr8 | 13195491  | 13198821  | 0 |
| chr8 | 18653394  | 18659079  | 0 |
| chr8 | 48486461  | 48492639  | 0 |
| chr8 | 56537388  | 56553515  | 0 |
| chr8 | 69493708  | 69539903  | 0 |
| chr8 | 81060262  | 81081490  | 0 |
| chr8 | 85495657  | 85540471  | 0 |
| chr8 | 85495874  | 85540875  | 0 |
| chr8 | 85496370  | 85541322  | 0 |
| chr8 | 85497645  | 85542449  | 0 |
| chr8 | 85643362  | 85691145  | 0 |
| chr8 | 88458946  | 88503303  | 0 |
| chr8 | 100133397 | 100165415 | 0 |
| chr8 | 104834321 | 104866887 | 0 |
| chr8 | 133161672 | 133167273 | 0 |

|      |           |           |   |
|------|-----------|-----------|---|
| chr8 | 143955598 | 143993844 | 0 |
| chr9 | 3462171   | 3466988   | 0 |
| chr9 | 3462402   | 3467191   | 0 |
| chr9 | 98603551  | 98627238  | 0 |
| chr9 | 98603877  | 98627503  | 0 |
| chr9 | 118315809 | 118338398 | 0 |
| chr9 | 120936425 | 120975899 | 0 |
| chr9 | 123592315 | 123598854 | 0 |
| chr9 | 124526518 | 124552590 | 0 |
| chr9 | 124668954 | 124669998 | 0 |
| chrX | 26089560  | 26123017  | 0 |
| chrX | 26090420  | 26123958  | 0 |
| chrX | 26091009  | 26124663  | 0 |
| chrX | 26091909  | 26125434  | 0 |
| chrX | 26092330  | 26125807  | 0 |
| chrX | 26093404  | 26126882  | 0 |
| chrX | 31439771  | 31459337  | 0 |
| chrX | 46781053  | 46817576  | 0 |
| chrX | 54759986  | 54804258  | 0 |
| chrX | 57160421  | 57176358  | 0 |
| chrX | 57163088  | 57179350  | 0 |
| chrX | 57163383  | 57180040  | 0 |
| chrX | 63391120  | 63435577  | 0 |
| chrX | 63391868  | 63436313  | 0 |
| chrX | 63392187  | 63436660  | 0 |
| chrX | 65274020  | 65318107  | 0 |
| chrX | 67366634  | 67406710  | 0 |
| chrX | 68920960  | 68960594  | 0 |
| chrX | 68923507  | 68963190  | 0 |
| chrX | 74647426  | 74674859  | 0 |
| chrX | 102766360 | 102780561 | 0 |
| chrX | 107452563 | 107454539 | 0 |
| chrX | 117028299 | 117055503 | 0 |
| chrX | 140795773 | 140811886 | 0 |
| chrX | 146147750 | 146149743 | 0 |
| chrX | 149713749 | 149733646 | 0 |
| chrX | 150531647 | 150547271 | 0 |
| chrX | 150574425 | 150586165 | 0 |
| chrY | 5069123   | 5103983   | 0 |
| chrY | 9967798   | 10009069  | 0 |
| chrY | 15167127  | 15193190  | 0 |

|       |           |           |   |
|-------|-----------|-----------|---|
| chrY  | 15167675  | 15193829  | 0 |
| chr1  | 31181042  | 31195047  | 1 |
| chr13 | 51122056  | 51164168  | 1 |
| chr13 | 66471619  | 66500012  | 1 |
| chr15 | 60083019  | 60098128  | 1 |
| chr16 | 87956630  | 87986100  | 1 |
| chr17 | 11690163  | 11706471  | 1 |
| chr2  | 213918176 | 213941138 | 1 |
| chr3  | 58776011  | 58807951  | 1 |
| chr3  | 58776031  | 58815772  | 1 |
| chr3  | 58779367  | 58805501  | 1 |
| chr3  | 58782388  | 58816295  | 1 |
| chr3  | 58782526  | 58808613  | 1 |
| chr3  | 162176742 | 162205106 | 1 |
| chr4  | 38475250  | 38506096  | 1 |
| chr4  | 54796337  | 54814034  | 1 |
| chr11 | 107736766 | 107753751 | 2 |
| chr11 | 107737766 | 107754732 | 2 |
| chr11 | 125749831 | 125771417 | 2 |
| chr16 | 68924327  | 68963148  | 2 |
| chr19 | 58600470  | 58647878  | 2 |
| chr19 | 61401731  | 61432513  | 2 |
| chr19 | 62572652  | 62598491  | 2 |
| chr2  | 116264115 | 116287283 | 2 |
| chr2  | 232722656 | 232752016 | 2 |
| chr2  | 232724406 | 232752723 | 2 |
| chr2  | 232725283 | 232753281 | 2 |
| chr2  | 232726222 | 232754154 | 2 |
| chr20 | 63848     | 91170     | 2 |
| chr3  | 144248009 | 144287782 | 2 |
| chr6  | 26514226  | 26552479  | 2 |
| chr9  | 17248979  | 17277215  | 2 |
| chr9  | 17254976  | 17277216  | 2 |
| chr9  | 95891470  | 95916186  | 2 |
| chr9  | 95892664  | 95917517  | 2 |
| chr9  | 95895726  | 95920532  | 2 |
| chr11 | 94398668  | 94422793  | 3 |
| chr13 | 66213547  | 66248610  | 3 |
| chr6  | 52729617  | 52771620  | 3 |
| chr11 | 56075176  | 56113063  | 4 |
| chr11 | 56100952  | 56136937  | 4 |

|       |           |           |    |
|-------|-----------|-----------|----|
| chr12 | 51130292  | 51152169  | 4  |
| chr12 | 51131038  | 51153030  | 4  |
| chr12 | 51131713  | 51153641  | 4  |
| chr12 | 51131713  | 51173092  | 4  |
| chr6  | 52758032  | 52797115  | 8  |
| chr17 | 36756663  | 36775230  | 10 |
| chr1  | 70146799  | 70164769  | 11 |
| chr6  | 52738196  | 52778804  | 11 |
| chr6  | 52739527  | 52780178  | 11 |
| chr8  | 71771170  | 71811746  | 12 |
| chr8  | 71772142  | 71812740  | 12 |
| chr11 | 93541125  | 93550334  | 13 |
| chr8  | 15459053  | 15479728  | 14 |
| chr8  | 15459644  | 15480527  | 14 |
| chr8  | 15460924  | 15481502  | 14 |
| chr8  | 15461520  | 15482427  | 14 |
| chr8  | 15462411  | 15483151  | 14 |
| chr19 | 58635421  | 58673115  | 17 |
| chr19 | 58637062  | 58674821  | 17 |
| chr22 | 26920578  | 26939753  | 17 |
| chr22 | 26922186  | 26940238  | 17 |
| chr6  | 71702475  | 71713033  | 18 |
| chr6  | 71703270  | 71713808  | 18 |
| chr6  | 71703672  | 71714238  | 18 |
| chr6  | 71704421  | 71715059  | 18 |
| chr6  | 71705104  | 71715710  | 18 |
| chr5  | 126254342 | 126268089 | 26 |
| chr5  | 126254994 | 126268755 | 26 |
| chr5  | 126255360 | 126269105 | 26 |
| chr5  | 126255700 | 126269427 | 26 |
| chr5  | 126257139 | 126271113 | 26 |
| chr5  | 126257577 | 126271311 | 26 |
| chr9  | 71282100  | 71313721  | 42 |
| chr9  | 71284957  | 71314452  | 42 |
| chr9  | 71285631  | 71314852  | 42 |
| chr9  | 71286629  | 71315881  | 42 |
| chr9  | 5292794   | 5329656   | 43 |
| chr16 | 74090198  | 74130702  | 51 |
| chr16 | 74090525  | 74131014  | 51 |
| chr16 | 74096080  | 74137424  | 51 |
| chr1  | 86178391  | 86186818  | 60 |

|       |          |          |    |
|-------|----------|----------|----|
| chr17 | 36456655 | 36475593 | 82 |
| chr17 | 36464664 | 36475593 | 82 |

Overlap with microhotspot is based on 50% reciprocal overlap.

**Table S7. List of CNVs within minihotspots**

| chr   | start     | end       | No of events within minihotspot |
|-------|-----------|-----------|---------------------------------|
| chr1  | 2469724   | 2499885   | 0                               |
| chr1  | 2472668   | 2491592   | 0                               |
| chr1  | 12917368  | 12975585  | 0                               |
| chr1  | 12970110  | 13031697  | 0                               |
| chr1  | 92368743  | 92384138  | 0                               |
| chr1  | 143326372 | 143333769 | 0                               |
| chr1  | 179200022 | 179286898 | 0                               |
| chr1  | 179203479 | 179298725 | 0                               |
| chr1  | 194925159 | 195016547 | 0                               |
| chr1  | 204082120 | 204091133 | 0                               |
| chr1  | 224141032 | 224195718 | 0                               |
| chr1  | 244835333 | 244866508 | 0                               |
| chr10 | 26944305  | 27026530  | 0                               |
| chr10 | 26951716  | 27007191  | 0                               |
| chr10 | 27424752  | 27436385  | 0                               |
| chr10 | 96759116  | 96795997  | 0                               |
| chr10 | 101682117 | 101713759 | 0                               |
| chr11 | 297319    | 316827    | 0                               |
| chr11 | 1638691   | 1668697   | 0                               |
| chr11 | 69864258  | 69869377  | 0                               |
| chr11 | 70914580  | 70954897  | 0                               |
| chr11 | 116509420 | 116587255 | 0                               |
| chr11 | 118033832 | 118066537 | 0                               |
| chr11 | 118053959 | 118067914 | 0                               |
| chr11 | 125748401 | 125772450 | 0                               |
| chr12 | 2660503   | 2722138   | 0                               |
| chr12 | 2674271   | 2723629   | 0                               |
| chr12 | 10924360  | 10976655  | 0                               |
| chr12 | 39557392  | 39562725  | 0                               |
| chr12 | 51127117  | 51154381  | 0                               |
| chr12 | 69486558  | 69489734  | 0                               |
| chr12 | 92410418  | 92417415  | 0                               |
| chr13 | 18433321  | 18523994  | 0                               |
| chr15 | 43190117  | 43215922  | 0                               |
| chr15 | 73300670  | 73356714  | 0                               |
| chr15 | 79287785  | 79309283  | 0                               |



|       |          |          |   |
|-------|----------|----------|---|
| chr16 | 142720   | 155198   | 0 |
| chr16 | 2601585  | 2687324  | 0 |
| chr16 | 2804128  | 2817953  | 0 |
| chr16 | 3042159  | 3066812  | 0 |
| chr16 | 31280833 | 31330347 | 0 |
| chr16 | 65526140 | 65541618 | 0 |
| chr16 | 73433985 | 73501309 | 0 |
| chr16 | 73796065 | 73815693 | 0 |
| chr17 | 1422235  | 1439016  | 0 |
| chr17 | 2985602  | 3070764  | 0 |
| chr17 | 16754112 | 16817813 | 0 |
| chr17 | 20333775 | 20371591 | 0 |
| chr17 | 25940403 | 25988412 | 0 |
| chr17 | 36831120 | 36849242 | 0 |
| chr17 | 37623684 | 37707008 | 0 |
| chr17 | 38256993 | 38274423 | 0 |
| chr17 | 55436696 | 55529713 | 0 |
| chr19 | 5782442  | 5796073  | 0 |
| chr19 | 5814345  | 5828859  | 0 |
| chr19 | 15699716 | 15766768 | 0 |
| chr19 | 21347870 | 21381429 | 0 |
| chr19 | 40532345 | 40546777 | 0 |
| chr19 | 42333940 | 42370269 | 0 |
| chr19 | 49604409 | 49612307 | 0 |
| chr19 | 51390726 | 51457278 | 0 |
| chr19 | 51408914 | 51430672 | 0 |
| chr19 | 57983031 | 58070109 | 3 |
| chr19 | 58150519 | 58176482 | 0 |
| chr19 | 58460834 | 58512214 | 0 |
| chr19 | 58472882 | 58500946 | 0 |
| chr19 | 58612185 | 58697001 | 0 |
| chr19 | 58616887 | 58700918 | 0 |
| chr19 | 58621084 | 58710505 | 0 |
| chr19 | 59776560 | 59801094 | 0 |
| chr19 | 59793199 | 59836638 | 0 |
| chr19 | 60142339 | 60186642 | 0 |
| chr19 | 63010931 | 63046050 | 1 |
| chr19 | 63022929 | 63057804 | 1 |
| chr2  | 73679654 | 73757822 | 9 |
| chr2  | 73728987 | 73794760 | 0 |
| chr2  | 85394272 | 85425835 | 0 |

|       |           |           |   |
|-------|-----------|-----------|---|
| chr2  | 178123722 | 178192420 | 0 |
| chr2  | 232899346 | 232938956 | 0 |
| chr2  | 232937816 | 233013878 | 0 |
| chr2  | 232950578 | 232984396 | 0 |
| chr2  | 234158915 | 234230618 | 1 |
| chr2  | 240617598 | 240634311 | 0 |
| chr20 | 5399985   | 5433107   | 0 |
| chr20 | 23701289  | 23789231  | 0 |
| chr20 | 23709603  | 23799725  | 0 |
| chr21 | 44782773  | 44824908  | 0 |
| chr21 | 44782778  | 44858062  | 0 |
| chr21 | 44783579  | 44872395  | 0 |
| chr21 | 44794095  | 44873311  | 0 |
| chr21 | 44795241  | 44882308  | 0 |
| chr21 | 44817995  | 44846077  | 0 |
| chr21 | 44818057  | 44836784  | 0 |
| chr21 | 44835730  | 44846042  | 0 |
| chr21 | 44899080  | 44930665  | 0 |
| chr21 | 44910115  | 44926641  | 0 |
| chr22 | 28086303  | 28150882  | 0 |
| chr22 | 34950608  | 34995068  | 0 |
| chr22 | 41172142  | 41254394  | 0 |
| chr22 | 43632564  | 43642175  | 1 |
| chr3  | 2543406   | 2552203   | 0 |
| chr3  | 9997452   | 10042081  | 0 |
| chr3  | 10002598  | 10043470  | 0 |
| chr3  | 10004270  | 10066016  | 0 |
| chr3  | 50433413  | 50472473  | 0 |
| chr3  | 127283237 | 127331288 | 0 |
| chr3  | 130286773 | 130330598 | 0 |
| chr3  | 140206973 | 140246402 | 0 |
| chr3  | 140221400 | 140246599 | 0 |
| chr3  | 181868737 | 181890801 | 0 |
| chr3  | 187109666 | 187192347 | 1 |
| chr4  | 54795931  | 54816976  | 0 |
| chr4  | 69764187  | 69860146  | 0 |
| chr4  | 73625313  | 73693774  | 0 |
| chr4  | 77019036  | 77028180  | 0 |
| chr5  | 68806945  | 68812625  | 1 |
| chr5  | 115593843 | 115608240 | 0 |
| chr5  | 139347842 | 139432547 | 0 |

|      |           |           |   |
|------|-----------|-----------|---|
| chr5 | 140168129 | 140190184 | 0 |
| chr5 | 140187910 | 140203418 | 0 |
| chr5 | 140455788 | 140462884 | 0 |
| chr5 | 140455788 | 140484070 | 0 |
| chr5 | 140455788 | 140512338 | 0 |
| chr5 | 140455802 | 140540105 | 0 |
| chr5 | 140455807 | 140497509 | 0 |
| chr5 | 140455809 | 140544640 | 0 |
| chr5 | 140455812 | 140534913 | 0 |
| chr5 | 140461510 | 140512338 | 0 |
| chr5 | 140461630 | 140518007 | 0 |
| chr5 | 140461644 | 140540105 | 0 |
| chr5 | 140461662 | 140534913 | 0 |
| chr5 | 140461693 | 140544640 | 0 |
| chr5 | 140482877 | 140554618 | 0 |
| chr5 | 140482952 | 140544624 | 0 |
| chr5 | 140482953 | 140512322 | 0 |
| chr5 | 140482958 | 140497503 | 0 |
| chr5 | 140482958 | 140540121 | 0 |
| chr5 | 140482967 | 140534903 | 0 |
| chr5 | 140482992 | 140518007 | 0 |
| chr5 | 140496286 | 140544630 | 0 |
| chr5 | 140496389 | 140576191 | 0 |
| chr5 | 140496391 | 140540063 | 0 |
| chr5 | 140496421 | 140512328 | 0 |
| chr5 | 140496421 | 140570935 | 0 |
| chr5 | 140496424 | 140518007 | 0 |
| chr5 | 140496442 | 140534855 | 0 |
| chr5 | 140511210 | 140518007 | 0 |
| chr5 | 140511231 | 140549386 | 0 |
| chr5 | 140511267 | 140596617 | 0 |
| chr5 | 140511277 | 140544655 | 0 |
| chr5 | 140516957 | 140570905 | 0 |
| chr5 | 140516970 | 140601903 | 0 |
| chr5 | 140516973 | 140607572 | 0 |
| chr5 | 140516975 | 140554570 | 0 |
| chr5 | 140516990 | 140561773 | 0 |
| chr5 | 140517008 | 140534849 | 0 |
| chr5 | 140533845 | 140554627 | 0 |
| chr5 | 140533845 | 140561846 | 0 |
| chr5 | 140533845 | 140607606 | 0 |

|      |           |           |   |
|------|-----------|-----------|---|
| chr5 | 140533854 | 140544637 | 0 |
| chr5 | 140539013 | 140561837 | 0 |
| chr5 | 140539029 | 140607606 | 0 |
| chr5 | 140539057 | 140596613 | 0 |
| chr5 | 140543562 | 140596617 | 0 |
| chr5 | 140543569 | 140561846 | 0 |
| chr5 | 140543579 | 140585579 | 0 |
| chr5 | 140548290 | 140607603 | 0 |
| chr5 | 140548297 | 140561813 | 0 |
| chr5 | 140548297 | 140596617 | 0 |
| chr5 | 140553533 | 140561928 | 0 |
| chr5 | 140553533 | 140596613 | 0 |
| chr5 | 140559529 | 140570936 | 0 |
| chr5 | 140560706 | 140607628 | 0 |
| chr5 | 140560746 | 140576194 | 0 |
| chr5 | 140560750 | 140601979 | 0 |
| chr5 | 140569878 | 140576202 | 0 |
| chr5 | 140569882 | 140601964 | 0 |
| chr5 | 140569885 | 140607606 | 0 |
| chr5 | 140575106 | 140607636 | 0 |
| chr5 | 140575118 | 140601965 | 0 |
| chr5 | 140575124 | 140596617 | 0 |
| chr5 | 140584373 | 140596617 | 0 |
| chr5 | 140584485 | 140607603 | 0 |
| chr5 | 140595561 | 140601965 | 0 |
| chr5 | 140595561 | 140607606 | 0 |
| chr5 | 140600784 | 140607606 | 0 |
| chr5 | 148395217 | 148475903 | 0 |
| chr5 | 150255197 | 150291579 | 2 |
| chr5 | 168075710 | 168102572 | 0 |
| chr5 | 177092919 | 177105825 | 0 |
| chr6 | 2943089   | 3002381   | 0 |
| chr6 | 2948262   | 2997963   | 0 |
| chr6 | 3099557   | 3125799   | 0 |
| chr6 | 27883284  | 27891179  | 0 |
| chr6 | 29170622  | 29251227  | 5 |
| chr6 | 29649385  | 29664662  | 5 |
| chr6 | 31357342  | 31439187  | 0 |
| chr6 | 31359708  | 31444438  | 0 |
| chr6 | 31890981  | 31905640  | 0 |
| chr6 | 32125017  | 32144424  | 0 |

|      |           |           |   |
|------|-----------|-----------|---|
| chr6 | 32125018  | 32138191  | 0 |
| chr6 | 32131597  | 32144424  | 0 |
| chr6 | 32131599  | 32138191  | 0 |
| chr6 | 32137145  | 32144424  | 0 |
| chr6 | 41273124  | 41326004  | 0 |
| chr6 | 57019262  | 57064537  | 8 |
| chr6 | 73999317  | 74017295  | 0 |
| chr6 | 150354339 | 150428016 | 0 |
| chr6 | 160800000 | 160880088 | 0 |
| chr7 | 23592668  | 23685917  | 0 |
| chr7 | 63323409  | 63399303  | 0 |
| chr7 | 65735947  | 65777648  | 2 |
| chr7 | 99791060  | 99810042  | 0 |
| chr7 | 148884150 | 148927431 | 0 |
| chr7 | 148922048 | 148994099 | 0 |
| chr7 | 149931381 | 150010719 | 0 |
| chr8 | 43328990  | 43346982  | 0 |
| chr8 | 82709110  | 82769536  | 0 |
| chr8 | 133390938 | 133400130 | 0 |
| chr8 | 143910899 | 143916979 | 0 |
| chr8 | 143951581 | 143996301 | 0 |
| chr9 | 21356566  | 21431942  | 0 |
| chr9 | 34234189  | 34265006  | 0 |
| chr9 | 93926381  | 94008385  | 0 |
| chr9 | 95125471  | 95169379  | 0 |
| chr9 | 135093007 | 135175242 | 0 |
| chr9 | 135099431 | 135170543 | 0 |
| chrX | 15573874  | 15633339  | 0 |
| chrX | 15592857  | 15648330  | 0 |
| chrX | 46203715  | 46279508  | 0 |
| chrX | 47698097  | 47777330  | 0 |
| chrX | 49487526  | 49530291  | 0 |
| chrX | 55261848  | 55327510  | 0 |
| chrX | 57159758  | 57180652  | 0 |
| chrX | 67766128  | 67826319  | 0 |
| chrX | 70486067  | 70553593  | 0 |
| chrX | 72132628  | 72223522  | 0 |
| chrX | 99996225  | 100030273 | 0 |
| chrX | 100637454 | 100697586 | 0 |
| chrX | 101266440 | 101284971 | 0 |
| chrX | 101791364 | 101856584 | 0 |

|      |           |           |   |
|------|-----------|-----------|---|
| chrX | 101792159 | 101888286 | 0 |
| chrX | 101801146 | 101864174 | 0 |
| chrX | 101853118 | 101888307 | 0 |
| chrX | 133983100 | 134013835 | 0 |
| chrX | 134773233 | 134858665 | 0 |
| chrX | 134790484 | 134858665 | 0 |
| chrX | 148376861 | 148417456 | 0 |
| chrX | 148392252 | 148415841 | 0 |
| chrX | 148577649 | 148650867 | 0 |
| chrX | 148578927 | 148652952 | 0 |
| chrX | 151985036 | 152003088 | 0 |
| chrX | 153465653 | 153535994 | 0 |

**Table S8. CNVs within *AluY* hotspots**

| Chr   | Start     | End       | CNVs with 50% reciprocal overlap with <i>AluY</i> |
|-------|-----------|-----------|---------------------------------------------------|
| chr10 | 12130000  | 12220000  | 4                                                 |
| chr10 | 69830000  | 69920000  | 0                                                 |
| chr10 | 70080000  | 70170000  | 0                                                 |
| chr10 | 103730000 | 103820000 | 0                                                 |
| chr10 | 103780000 | 103870000 | 0                                                 |
| chr10 | 103880000 | 103970000 | 0                                                 |
| chr10 | 126430000 | 126520000 | 0                                                 |
| chr11 | 680000    | 770000    | 0                                                 |
| chr11 | 9330000   | 9420000   | 0                                                 |
| chr11 | 9430000   | 9520000   | 0                                                 |
| chr11 | 62130000  | 62220000  | 0                                                 |
| chr11 | 62230000  | 62320000  | 0                                                 |
| chr11 | 63180000  | 63270000  | 0                                                 |
| chr11 | 65180000  | 65270000  | 0                                                 |
| chr11 | 66080000  | 66170000  | 0                                                 |
| chr11 | 66580000  | 66670000  | 0                                                 |
| chr12 | 2880000   | 2970000   | 0                                                 |
| chr12 | 7930000   | 8020000   | 155                                               |
| chr12 | 19380000  | 19470000  | 50                                                |
| chr12 | 31780000  | 31870000  | 0                                                 |
| chr12 | 47780000  | 47870000  | 0                                                 |
| chr12 | 52030000  | 52120000  | 0                                                 |
| chr12 | 54930000  | 55020000  | 0                                                 |
| chr12 | 55330000  | 55420000  | 0                                                 |
| chr12 | 103130000 | 103220000 | 0                                                 |
| chr12 | 109280000 | 109370000 | 0                                                 |

|       |           |           |   |
|-------|-----------|-----------|---|
| chr12 | 109330000 | 109420000 | 0 |
| chr12 | 109380000 | 109470000 | 0 |
| chr12 | 110480000 | 110570000 | 0 |
| chr12 | 111280000 | 111370000 | 0 |
| chr12 | 119180000 | 119270000 | 0 |
| chr12 | 119380000 | 119470000 | 0 |
| chr12 | 119430000 | 119520000 | 0 |
| chr12 | 121480000 | 121570000 | 0 |
| chr12 | 122230000 | 122320000 | 1 |
| chr12 | 122430000 | 122520000 | 0 |
| chr14 | 34080000  | 34170000  | 0 |
| chr14 | 34130000  | 34220000  | 0 |
| chr14 | 49180000  | 49270000  | 0 |
| chr14 | 72980000  | 73070000  | 0 |
| chr14 | 103380000 | 103470000 | 0 |
| chr15 | 20580000  | 20670000  | 0 |
| chr15 | 39430000  | 39520000  | 0 |
| chr15 | 39480000  | 39570000  | 0 |
| chr15 | 41830000  | 41920000  | 0 |
| chr15 | 62430000  | 62520000  | 0 |
| chr15 | 62630000  | 62720000  | 0 |
| chr15 | 64380000  | 64470000  | 1 |
| chr15 | 72980000  | 73070000  | 0 |
| chr16 | 80000     | 170000    | 0 |
| chr16 | 130000    | 220000    | 0 |
| chr16 | 180000    | 270000    | 0 |
| chr16 | 380000    | 470000    | 0 |
| chr16 | 2180000   | 2270000   | 0 |
| chr16 | 2830000   | 2920000   | 0 |
| chr16 | 4230000   | 4320000   | 0 |
| chr16 | 11780000  | 11870000  | 0 |
| chr16 | 29580000  | 29670000  | 0 |
| chr16 | 30280000  | 30370000  | 0 |
| chr16 | 57180000  | 57270000  | 0 |
| chr16 | 66130000  | 66220000  | 0 |
| chr16 | 66330000  | 66420000  | 0 |
| chr16 | 67780000  | 67870000  | 0 |
| chr16 | 68830000  | 68920000  | 0 |
| chr16 | 68880000  | 68970000  | 0 |
| chr16 | 70380000  | 70470000  | 0 |
| chr16 | 73980000  | 74070000  | 0 |

|       |          |          |   |
|-------|----------|----------|---|
| chr16 | 87780000 | 87870000 | 0 |
| chr16 | 88230000 | 88320000 | 0 |
| chr16 | 88330000 | 88420000 | 0 |
| chr16 | 88380000 | 88470000 | 0 |
| chr16 | 88430000 | 88520000 | 0 |
| chr17 | 780000   | 870000   | 0 |
| chr17 | 1080000  | 1170000  | 0 |
| chr17 | 1130000  | 1220000  | 0 |
| chr17 | 1180000  | 1270000  | 0 |
| chr17 | 1230000  | 1320000  | 0 |
| chr17 | 1480000  | 1570000  | 0 |
| chr17 | 1580000  | 1670000  | 0 |
| chr17 | 2080000  | 2170000  | 0 |
| chr17 | 2130000  | 2220000  | 0 |
| chr17 | 4630000  | 4720000  | 0 |
| chr17 | 7080000  | 7170000  | 0 |
| chr17 | 17080000 | 17170000 | 0 |
| chr17 | 17130000 | 17220000 | 0 |
| chr17 | 19680000 | 19770000 | 0 |
| chr17 | 24130000 | 24220000 | 0 |
| chr17 | 24680000 | 24770000 | 0 |
| chr17 | 27230000 | 27320000 | 0 |
| chr17 | 27280000 | 27370000 | 0 |
| chr17 | 34180000 | 34270000 | 0 |
| chr17 | 35580000 | 35670000 | 0 |
| chr17 | 38380000 | 38470000 | 0 |
| chr17 | 38480000 | 38570000 | 0 |
| chr17 | 38530000 | 38620000 | 0 |
| chr17 | 39530000 | 39620000 | 0 |
| chr17 | 40580000 | 40670000 | 0 |
| chr17 | 42930000 | 43020000 | 0 |
| chr17 | 44330000 | 44420000 | 0 |
| chr17 | 54430000 | 54520000 | 1 |
| chr17 | 70630000 | 70720000 | 0 |
| chr17 | 70680000 | 70770000 | 0 |
| chr17 | 70880000 | 70970000 | 0 |
| chr17 | 77130000 | 77220000 | 0 |
| chr17 | 77180000 | 77270000 | 0 |
| chr17 | 78030000 | 78120000 | 1 |
| chr18 | 17430000 | 17520000 | 0 |
| chr19 | 680000   | 770000   | 0 |



|       |          |          |   |
|-------|----------|----------|---|
| chr19 | 1230000  | 1320000  | 0 |
| chr19 | 1830000  | 1920000  | 0 |
| chr19 | 1930000  | 2020000  | 0 |
| chr19 | 2430000  | 2520000  | 0 |
| chr19 | 2780000  | 2870000  | 1 |
| chr19 | 2830000  | 2920000  | 0 |
| chr19 | 2980000  | 3070000  | 0 |
| chr19 | 4030000  | 4120000  | 0 |
| chr19 | 4180000  | 4270000  | 0 |
| chr19 | 4380000  | 4470000  | 0 |
| chr19 | 4680000  | 4770000  | 0 |
| chr19 | 4730000  | 4820000  | 0 |
| chr19 | 4780000  | 4870000  | 0 |
| chr19 | 5630000  | 5720000  | 0 |
| chr19 | 6230000  | 6320000  | 0 |
| chr19 | 6280000  | 6370000  | 0 |
| chr19 | 7730000  | 7820000  | 0 |
| chr19 | 8330000  | 8420000  | 0 |
| chr19 | 10180000 | 10270000 | 0 |
| chr19 | 10280000 | 10370000 | 0 |
| chr19 | 10430000 | 10520000 | 0 |
| chr19 | 10530000 | 10620000 | 0 |
| chr19 | 10780000 | 10870000 | 0 |
| chr19 | 10880000 | 10970000 | 0 |
| chr19 | 11030000 | 11120000 | 0 |
| chr19 | 11080000 | 11170000 | 0 |
| chr19 | 11530000 | 11620000 | 0 |
| chr19 | 11980000 | 12070000 | 0 |
| chr19 | 12480000 | 12570000 | 0 |
| chr19 | 12580000 | 12670000 | 0 |
| chr19 | 12730000 | 12820000 | 0 |
| chr19 | 12880000 | 12970000 | 0 |
| chr19 | 13730000 | 13820000 | 0 |
| chr19 | 41280000 | 41370000 | 0 |
| chr19 | 46330000 | 46420000 | 0 |
| chr19 | 50980000 | 51070000 | 0 |
| chr19 | 51580000 | 51670000 | 0 |
| chr19 | 52280000 | 52370000 | 0 |
| chr19 | 52330000 | 52420000 | 0 |
| chr19 | 54030000 | 54120000 | 0 |
| chr19 | 54680000 | 54770000 | 0 |

|       |           |           |   |
|-------|-----------|-----------|---|
| chr19 | 54880000  | 54970000  | 0 |
| chr19 | 58080000  | 58170000  | 0 |
| chr19 | 60080000  | 60170000  | 0 |
| chr19 | 63130000  | 63220000  | 0 |
| chr19 | 63280000  | 63370000  | 1 |
| chr2  | 32380000  | 32470000  | 0 |
| chr2  | 61580000  | 61670000  | 0 |
| chr2  | 131530000 | 131620000 | 0 |
| chr2  | 202880000 | 202970000 | 0 |
| chr20 | 3730000   | 3820000   | 1 |
| chr20 | 29630000  | 29720000  | 0 |
| chr20 | 30730000  | 30820000  | 0 |
| chr20 | 32680000  | 32770000  | 0 |
| chr20 | 33830000  | 33920000  | 0 |
| chr20 | 47180000  | 47270000  | 0 |
| chr20 | 49830000  | 49920000  | 0 |
| chr22 | 16330000  | 16420000  | 0 |
| chr22 | 16380000  | 16470000  | 0 |
| chr22 | 16430000  | 16520000  | 0 |
| chr22 | 16480000  | 16570000  | 0 |
| chr22 | 18780000  | 18870000  | 0 |
| chr22 | 19530000  | 19620000  | 0 |
| chr22 | 20030000  | 20120000  | 0 |
| chr22 | 20180000  | 20270000  | 0 |
| chr22 | 20430000  | 20520000  | 0 |
| chr22 | 20530000  | 20620000  | 0 |
| chr22 | 23480000  | 23570000  | 0 |
| chr22 | 23580000  | 23670000  | 0 |
| chr22 | 36280000  | 36370000  | 1 |
| chr22 | 36630000  | 36720000  | 0 |
| chr22 | 38830000  | 38920000  | 0 |
| chr22 | 39630000  | 39720000  | 0 |
| chr22 | 39980000  | 40070000  | 0 |
| chr22 | 40080000  | 40170000  | 0 |
| chr22 | 40380000  | 40470000  | 0 |
| chr22 | 40430000  | 40520000  | 0 |
| chr22 | 49080000  | 49189700  | 0 |
| chr22 | 49130000  | 49220000  | 0 |
| chr22 | 49380000  | 49470000  | 0 |
| chr3  | 10130000  | 10220000  | 0 |
| chr3  | 10180000  | 10270000  | 0 |

|      |           |           |   |
|------|-----------|-----------|---|
| chr3 | 32680000  | 32770000  | 0 |
| chr3 | 47480000  | 47570000  | 0 |
| chr3 | 47730000  | 47820000  | 0 |
| chr3 | 47780000  | 47870000  | 0 |
| chr3 | 48180000  | 48270000  | 0 |
| chr3 | 48880000  | 48970000  | 0 |
| chr3 | 48930000  | 49020000  | 0 |
| chr3 | 49030000  | 49120000  | 0 |
| chr3 | 49180000  | 49270000  | 0 |
| chr3 | 49330000  | 49420000  | 0 |
| chr3 | 49380000  | 49470000  | 0 |
| chr3 | 49430000  | 49520000  | 0 |
| chr3 | 49730000  | 49820000  | 0 |
| chr3 | 49930000  | 50020000  | 1 |
| chr3 | 129830000 | 129920000 | 0 |
| chr3 | 130330000 | 130420000 | 0 |
| chr4 | 2430000   | 2520000   | 0 |
| chr4 | 39380000  | 39470000  | 0 |
| chr4 | 39430000  | 39520000  | 0 |
| chr4 | 39630000  | 39720000  | 0 |
| chr4 | 140380000 | 140470000 | 0 |
| chr5 | 43180000  | 43270000  | 0 |
| chr5 | 126080000 | 126170000 | 0 |
| chr5 | 132330000 | 132420000 | 0 |
| chr5 | 172330000 | 172420000 | 0 |
| chr5 | 176330000 | 176420000 | 0 |
| chr5 | 177480000 | 177570000 | 0 |
| chr5 | 178880000 | 178970000 | 1 |
| chr5 | 178930000 | 179020000 | 1 |
| chr6 | 17380000  | 17470000  | 0 |
| chr6 | 17780000  | 17870000  | 0 |
| chr6 | 33380000  | 33470000  | 0 |
| chr6 | 42880000  | 42970000  | 0 |
| chr6 | 42930000  | 43020000  | 0 |
| chr6 | 107430000 | 107520000 | 1 |
| chr7 | 780000    | 870000    | 0 |
| chr7 | 2280000   | 2370000   | 0 |
| chr7 | 5130000   | 5220000   | 0 |
| chr7 | 5430000   | 5520000   | 0 |
| chr7 | 5530000   | 5620000   | 0 |
| chr7 | 5780000   | 5870000   | 5 |

|       |           |           |   |
|-------|-----------|-----------|---|
| chr7  | 6030000   | 6120000   | 0 |
| chr7  | 6280000   | 6370000   | 0 |
| chr7  | 6380000   | 6470000   | 0 |
| chr7  | 23480000  | 23570000  | 0 |
| chr7  | 55830000  | 55920000  | 0 |
| chr7  | 65130000  | 65220000  | 0 |
| chr7  | 65180000  | 65270000  | 0 |
| chr7  | 65230000  | 65320000  | 0 |
| chr7  | 65680000  | 65770000  | 0 |
| chr7  | 72530000  | 72620000  | 0 |
| chr7  | 73130000  | 73220000  | 0 |
| chr7  | 73630000  | 73720000  | 0 |
| chr7  | 104780000 | 104870000 | 0 |
| chr7  | 104880000 | 104970000 | 0 |
| chr7  | 139780000 | 139870000 | 0 |
| chr7  | 148330000 | 148420000 | 0 |
| chr7  | 148380000 | 148470000 | 0 |
| chr7  | 148430000 | 148520000 | 0 |
| chr8  | 42680000  | 42770000  | 0 |
| chr8  | 95780000  | 95870000  | 0 |
| chr9  | 33980000  | 34070000  | 0 |
| chr9  | 34130000  | 34220000  | 0 |
| chr9  | 36530000  | 36620000  | 0 |
| chr9  | 130430000 | 130520000 | 0 |
| chr9  | 130630000 | 130720000 | 0 |
| chr9  | 130780000 | 130870000 | 0 |
| chr9  | 131830000 | 131920000 | 0 |
| chr9  | 135930000 | 136020000 | 0 |
| chr9  | 139580000 | 139670000 | 0 |
| chr3  | 52530000  | 52620000  | 0 |
| chr17 | 34780000  | 34870000  | 0 |
| chr8  | 67680000  | 67770000  | 0 |
| chr15 | 42580000  | 42670000  | 0 |
| chr5  | 138630000 | 138720000 | 0 |
| chr7  | 99480000  | 99570000  | 0 |
| chr17 | 57330000  | 57420000  | 0 |
| chr17 | 1480000   | 1570000   | 0 |
| chr12 | 52080000  | 52170000  | 0 |
| chrX  | 23880000  | 23970000  | 0 |
| chr16 | 66180000  | 66270000  | 0 |
| chr22 | 37180000  | 37270000  | 0 |

|       |           |           |   |
|-------|-----------|-----------|---|
| chr17 | 23980000  | 24070000  | 0 |
| chr17 | 46580000  | 46670000  | 0 |
| chr20 | 33680000  | 33770000  | 0 |
| chr16 | 30580000  | 30670000  | 0 |
| chr15 | 41830000  | 41920000  | 0 |
| chr20 | 33730000  | 33820000  | 0 |
| chr17 | 34880000  | 34970000  | 0 |
| chr12 | 52880000  | 52970000  | 0 |
| chr6  | 43030000  | 43120000  | 0 |
| chr12 | 52230000  | 52320000  | 0 |
| chr16 | 70380000  | 70470000  | 0 |
| chr11 | 62130000  | 62220000  | 0 |
| chr11 | 62180000  | 62270000  | 0 |
| chr17 | 37230000  | 37320000  | 0 |
| chr16 | 30530000  | 30620000  | 0 |
| chr5  | 178930000 | 179020000 | 1 |
| chr11 | 47380000  | 47470000  | 0 |
| chr2  | 27430000  | 27520000  | 0 |
| chr2  | 47830000  | 47920000  | 0 |
| chr7  | 44830000  | 44920000  | 0 |
| chr15 | 62480000  | 62570000  | 0 |
| chr16 | 66430000  | 66520000  | 0 |
| chr12 | 52030000  | 52120000  | 0 |
| chr12 | 52930000  | 53020000  | 0 |
| chr11 | 66130000  | 66220000  | 0 |
| chr12 | 51880000  | 51970000  | 0 |
| chr11 | 118380000 | 118470000 | 0 |
| chr12 | 54680000  | 54770000  | 0 |
| chr5  | 137730000 | 137820000 | 0 |
| chr20 | 29730000  | 29820000  | 0 |
| chr12 | 54980000  | 55070000  | 0 |
| chr12 | 51930000  | 52020000  | 0 |
| chr19 | 47480000  | 47570000  | 0 |
| chr9  | 130330000 | 130420000 | 0 |
| chr12 | 54480000  | 54570000  | 0 |
| chr7  | 99880000  | 99970000  | 0 |
| chr6  | 149980000 | 150070000 | 0 |
| chr17 | 24830000  | 24920000  | 0 |
| chr16 | 30930000  | 31020000  | 0 |
| chr2  | 27380000  | 27470000  | 0 |
| chr14 | 20980000  | 21070000  | 0 |

|       |           |           |   |
|-------|-----------|-----------|---|
| chr14 | 72580000  | 72670000  | 8 |
| chr7  | 100080000 | 100170000 | 0 |
| chr20 | 3030000   | 3120000   | 0 |
| chr11 | 46680000  | 46770000  | 0 |
| chr14 | 101530000 | 101620000 | 0 |
| chr17 | 27680000  | 27770000  | 0 |
| chr9  | 127080000 | 127170000 | 0 |
| chr19 | 10630000  | 10720000  | 0 |
| chr11 | 117880000 | 117970000 | 0 |
| chr2  | 203080000 | 203170000 | 0 |
| chr11 | 62280000  | 62370000  | 0 |
| chr12 | 54930000  | 55020000  | 0 |
| chr6  | 31830000  | 31920000  | 0 |
| chr7  | 100530000 | 100620000 | 0 |
| chr5  | 137830000 | 137920000 | 0 |
| chr19 | 8380000   | 8470000   | 0 |
| chr22 | 30030000  | 30120000  | 0 |
| chr10 | 74880000  | 74970000  | 0 |
| chr17 | 35530000  | 35620000  | 0 |
| chr10 | 75030000  | 75120000  | 0 |
| chr17 | 4730000   | 4820000   | 0 |
| chr17 | 35430000  | 35520000  | 0 |
| chr17 | 2130000   | 2220000   | 0 |
| chr11 | 9380000   | 9470000   | 0 |
| chr12 | 47330000  | 47420000  | 0 |
| chr20 | 45380000  | 45470000  | 0 |
| chr12 | 47730000  | 47820000  | 0 |
| chr6  | 37180000  | 37270000  | 0 |
| chr11 | 46480000  | 46570000  | 0 |
| chr12 | 6630000   | 6720000   | 0 |
| chr16 | 30980000  | 31070000  | 0 |
| chr17 | 37380000  | 37470000  | 0 |
| chr16 | 30780000  | 30870000  | 0 |
| chr3  | 49480000  | 49570000  | 0 |
| chr12 | 121530000 | 121620000 | 0 |
| chr2  | 61530000  | 61620000  | 0 |
| chr16 | 31080000  | 31170000  | 0 |
| chr12 | 54830000  | 54920000  | 0 |
| chr10 | 93930000  | 94020000  | 0 |
| chr7  | 101630000 | 101720000 | 0 |
| chr11 | 17030000  | 17120000  | 0 |

|       |           |           |   |
|-------|-----------|-----------|---|
| chr9  | 130680000 | 130770000 | 0 |
| chr14 | 22430000  | 22520000  | 0 |
| chr3  | 187930000 | 188020000 | 0 |
| chr12 | 55280000  | 55370000  | 0 |
| chrX  | 70480000  | 70570000  | 0 |
| chr14 | 21030000  | 21120000  | 0 |
| chr17 | 40180000  | 40270000  | 0 |
| chr2  | 70230000  | 70320000  | 0 |
| chr19 | 43980000  | 44070000  | 0 |
| chr2  | 61580000  | 61670000  | 0 |
| chr15 | 39580000  | 39670000  | 0 |
| chr19 | 12630000  | 12720000  | 0 |
| chr11 | 57180000  | 57270000  | 0 |
| chr10 | 70130000  | 70220000  | 0 |
| chr19 | 50630000  | 50720000  | 0 |
| chr19 | 45530000  | 45620000  | 0 |
| chr10 | 103730000 | 103820000 | 0 |
| chr22 | 39830000  | 39920000  | 0 |
| chr6  | 30680000  | 30770000  | 0 |
| chr18 | 17330000  | 17420000  | 0 |
| chr15 | 62530000  | 62620000  | 0 |
| chr17 | 24080000  | 24170000  | 0 |
| chr17 | 33730000  | 33820000  | 0 |
| chr3  | 171530000 | 171620000 | 0 |
| chr11 | 47180000  | 47270000  | 0 |
| chr11 | 47530000  | 47620000  | 0 |
| chr10 | 69730000  | 69820000  | 0 |
| chr10 | 103980000 | 104070000 | 0 |
| chr17 | 7080000   | 7170000   | 0 |
| chr6  | 43180000  | 43270000  | 0 |
| chr11 | 122380000 | 122470000 | 0 |
| chr19 | 12680000  | 12770000  | 0 |
| chr17 | 31930000  | 32020000  | 0 |
| chr10 | 105080000 | 105170000 | 0 |
| chr19 | 39480000  | 39570000  | 0 |
| chr20 | 43880000  | 43970000  | 0 |
| chr19 | 51030000  | 51120000  | 0 |
| chr15 | 50080000  | 50170000  | 0 |
| chr17 | 38380000  | 38470000  | 0 |
| chr17 | 63330000  | 63420000  | 0 |
| chr19 | 13880000  | 13970000  | 0 |

|       |           |           |   |
|-------|-----------|-----------|---|
| chr10 | 74080000  | 74170000  | 0 |
| chr6  | 36630000  | 36720000  | 0 |
| chrX  | 48280000  | 48370000  | 0 |
| chr17 | 40080000  | 40170000  | 0 |
| chr12 | 55080000  | 55170000  | 0 |
| chr5  | 134030000 | 134120000 | 0 |
| chr12 | 52180000  | 52270000  | 0 |
| chr20 | 47230000  | 47320000  | 0 |
| chr10 | 70280000  | 70370000  | 0 |
| chr11 | 64280000  | 64370000  | 0 |
| chr19 | 43630000  | 43720000  | 1 |
| chr14 | 30580000  | 30670000  | 0 |
| chr12 | 51980000  | 52070000  | 0 |
| chr22 | 39880000  | 39970000  | 0 |
| chr16 | 29730000  | 29820000  | 0 |
| chr17 | 44680000  | 44770000  | 0 |
| chrX  | 135730000 | 135820000 | 0 |
| chr10 | 69280000  | 69370000  | 0 |
| chr5  | 176430000 | 176520000 | 0 |
| chr12 | 110930000 | 111020000 | 0 |
| chr17 | 2080000   | 2170000   | 0 |
| chr3  | 49780000  | 49870000  | 0 |
| chr11 | 3630000   | 3720000   | 0 |
| chr12 | 119430000 | 119520000 | 0 |
| chr15 | 42530000  | 42620000  | 0 |
| chr16 | 70430000  | 70520000  | 0 |
| chr11 | 60880000  | 60970000  | 0 |
| chr17 | 38430000  | 38520000  | 0 |
| chr9  | 130480000 | 130570000 | 0 |
| chr10 | 104030000 | 104120000 | 0 |
| chr16 | 28780000  | 28870000  | 0 |
| chr16 | 29780000  | 29870000  | 0 |
| chr2  | 38780000  | 38870000  | 0 |
| chr6  | 107630000 | 107720000 | 0 |
| chrX  | 100180000 | 100270000 | 0 |
| chr19 | 54730000  | 54820000  | 0 |
| chrX  | 48780000  | 48870000  | 0 |
| chr17 | 38080000  | 38170000  | 0 |
| chr12 | 56080000  | 56170000  | 0 |
| chr17 | 57380000  | 57470000  | 0 |
| chr16 | 69030000  | 69120000  | 0 |



|       |           |           |   |
|-------|-----------|-----------|---|
| chrX  | 70380000  | 70470000  | 0 |
| chr7  | 5330000   | 5420000   | 0 |
| chr17 | 55230000  | 55320000  | 0 |
| chr19 | 12780000  | 12870000  | 0 |
| chr17 | 4630000   | 4720000   | 0 |
| chr17 | 8080000   | 8170000   | 0 |
| chr6  | 42880000  | 42970000  | 0 |
| chr12 | 111080000 | 111170000 | 0 |
| chr16 | 11830000  | 11920000  | 0 |
| chr22 | 30130000  | 30220000  | 0 |
| chr19 | 19580000  | 19670000  | 0 |
| chr17 | 18130000  | 18220000  | 0 |
| chr4  | 57430000  | 57520000  | 0 |
| chr19 | 12880000  | 12970000  | 0 |
| chrX  | 122880000 | 122970000 | 0 |
| chr12 | 97430000  | 97520000  | 0 |
| chr9  | 130780000 | 130870000 | 0 |
| chr11 | 66080000  | 66170000  | 0 |
| chr14 | 20830000  | 20920000  | 0 |
| chrX  | 70280000  | 70370000  | 0 |
| chr17 | 54580000  | 54670000  | 0 |
| chr22 | 40130000  | 40220000  | 0 |
| chr19 | 14030000  | 14120000  | 0 |
| chr17 | 59130000  | 59220000  | 0 |
| chr10 | 94180000  | 94270000  | 0 |
| chr12 | 122330000 | 122420000 | 0 |
| chr9  | 127480000 | 127570000 | 0 |
| chr16 | 66380000  | 66470000  | 0 |
| chr17 | 24180000  | 24270000  | 0 |
| chr16 | 69080000  | 69170000  | 1 |
| chr2  | 172480000 | 172570000 | 0 |
| chr14 | 73430000  | 73520000  | 0 |
| chr16 | 11730000  | 11820000  | 0 |
| chr11 | 47680000  | 47770000  | 0 |
| chr6  | 90580000  | 90670000  | 0 |
| chr12 | 121330000 | 121420000 | 0 |
| chr22 | 37230000  | 37320000  | 0 |
| chr19 | 40980000  | 41070000  | 0 |
| chr17 | 24980000  | 25070000  | 0 |
| chr7  | 99830000  | 99920000  | 0 |
| chr8  | 38180000  | 38270000  | 1 |

|       |           |           |   |
|-------|-----------|-----------|---|
| chr20 | 43930000  | 44020000  | 0 |
| chr7  | 99530000  | 99620000  | 0 |
| chr3  | 49880000  | 49970000  | 0 |
| chr12 | 6580000   | 6670000   | 0 |
| chr11 | 47130000  | 47220000  | 0 |
| chr10 | 104180000 | 104270000 | 0 |
| chr20 | 30330000  | 30420000  | 0 |
| chr7  | 101180000 | 101270000 | 0 |
| chr16 | 30880000  | 30970000  | 0 |
| chr5  | 159430000 | 159520000 | 0 |
| chr17 | 54130000  | 54220000  | 0 |
| chr12 | 109030000 | 109120000 | 0 |
| chr12 | 49730000  | 49820000  | 0 |
| chr5  | 134130000 | 134220000 | 0 |
| chr14 | 38680000  | 38770000  | 0 |
| chr5  | 138930000 | 139020000 | 0 |
| chr9  | 130730000 | 130820000 | 0 |
| chr17 | 1930000   | 2020000   | 0 |
| chr17 | 1230000   | 1320000   | 0 |
| chr16 | 67730000  | 67820000  | 0 |
| chr19 | 12730000  | 12820000  | 0 |
| chr17 | 63380000  | 63470000  | 0 |
| chr16 | 23430000  | 23520000  | 0 |
| chr16 | 4780000   | 4870000   | 0 |
| chr7  | 75730000  | 75820000  | 0 |
| chr6  | 43580000  | 43670000  | 0 |
| chr17 | 7980000   | 8070000   | 0 |
| chr17 | 1330000   | 1420000   | 0 |
| chr17 | 37180000  | 37270000  | 0 |
| chr16 | 66230000  | 66320000  | 0 |
| chr12 | 119530000 | 119620000 | 0 |
| chr19 | 50980000  | 51070000  | 0 |

**Table S9. List of all smaller hotspot CNVs**

| Genomic region (hg18)    | Cases<br>n=2,588 | Controls<br>n=580 | Description | P-value  | Odd ratio | Lower    | Upper    |
|--------------------------|------------------|-------------------|-------------|----------|-----------|----------|----------|
| chr12:7930000-8020000    | 22               | 4                 | AluYDels    | 0.468897 | 1.234528  | 0.417056 | 4.946843 |
| chr14:72580000-72670000  | 5                | 3                 | AluYDels    | 0.958152 | 0.372458  | 0.072246 | 2.405182 |
| chr7:5738853-5871832     | 2                | 0                 | AluYDels    | 0.66731  | Inf       | 0.042067 | Inf      |
| chr10:12130000-12220000  | 1                | 0                 | AluYDels    | 0.816919 | Inf       | 0.005762 | Inf      |
| chr12:19380000-19470000  | 1                | 0                 | AluYDels    | 0.816919 | Inf       | 0.005762 | Inf      |
| chr19:2769955-3461478    | 1                | 0                 | AluYDels    | 0.816919 | Inf       | 0.005762 | Inf      |
| chr19:2777247-2838715    | 1                | 0                 | AluYDels    | 0.816919 | Inf       | 0.005762 | Inf      |
| chr19:43630000-43720000  | 1                | 0                 | AluYDels    | 0.816919 | Inf       | 0.005762 | Inf      |
| chr22:36277660-36330258  | 1                | 0                 | AluYDels    | 0.816919 | Inf       | 0.005762 | Inf      |
| chr22:38773641-39148257  | 1                | 0                 | AluYDels    | 0.816919 | Inf       | 0.005762 | Inf      |
| chr6:107430000-107518731 | 1                | 0                 | AluYDels    | 0.816919 | Inf       | 0.005762 | Inf      |
| chr7:5120000-5170000     | 1                | 0                 | AluYDels    | 0.816919 | Inf       | 0.005762 | Inf      |
| chr7:5790188-5870000     | 1                | 0                 | AluYDels    | 0.816919 | Inf       | 0.005762 | Inf      |
| chr16:69080000-69170000  | 0                | 1                 | AluYDels    | 1        | 0         | 0        | 8.740345 |
| chr15:64375665-64479422  | 1                | 0                 | AluYDups    | 0.816919 | Inf       | 0.005762 | Inf      |
| chr17:78030000-78250000  | 1                | 0                 | AluYDups    | 0.816919 | Inf       | 0.005762 | Inf      |
| chr17:902154-1567639     | 1                | 0                 | AluYDups    | 0.816919 | Inf       | 0.005762 | Inf      |
| chr17:987984-1250631     | 1                | 0                 | AluYDups    | 0.816919 | Inf       | 0.005762 | Inf      |
| chr19:63295548-63370953  | 1                | 0                 | AluYDups    | 0.816919 | Inf       | 0.005762 | Inf      |
| chr20:33776065-33833342  | 1                | 0                 | AluYDups    | 0.816919 | Inf       | 0.005762 | Inf      |
| chr20:33839309-34020687  | 1                | 0                 | AluYDups    | 0.816919 | Inf       | 0.005762 | Inf      |
| chr20:3725594-3842583    | 1                | 0                 | AluYDups    | 0.816919 | Inf       | 0.005762 | Inf      |
| chr3:49900360-50063973   | 1                | 0                 | AluYDups    | 0.816919 | Inf       | 0.005762 | Inf      |
| chr5:178871628-179015299 | 1                | 0                 | AluYDups    | 0.816919 | Inf       | 0.005762 | Inf      |
| chr7:5595608-5889320     | 1                | 0                 | AluYDups    | 0.816919 | Inf       | 0.005762 | Inf      |
| chr8:38158036-38286608   | 1                | 0                 | AluYDups    | 0.816919 | Inf       | 0.005762 | Inf      |
| chr9:129863151-130919094 | 1                | 0                 | AluYDups    | 0.816919 | Inf       | 0.005762 | Inf      |
| chr7:5738853-5871832     | 2                | 0                 | AluYDups    | 0.66731  | Inf       | 0.042067 | Inf      |

|                           |     |    |             |          |          |          |          |
|---------------------------|-----|----|-------------|----------|----------|----------|----------|
| chr10:12127247-12207883   | 3   | 0  | AluYDups    | 0.545061 | Inf      | 0.09253  | Inf      |
| chr12:19380000-19470000   | 43  | 6  | AluYDups    | 0.180159 | 1.616148 | 0.68047  | 4.668758 |
| chr12:7930000-8020000     | 106 | 23 | AluYDups    | 0.498171 | 1.034263 | 0.647082 | 1.718025 |
| chr12:122230000-122320000 | 0   | 1  | AluYDups    | 1        | 0        | 0        | 8.740345 |
| chr17:54430000-54520000   | 0   | 1  | AluYDups    | 1        | 0        | 0        | 8.740345 |
| chr17:77975000-78100000   | 0   | 1  | AluYDups    | 1        | 0        | 0        | 8.740345 |
| chr10:100703151-100940746 | 1   | 0  | MicroHSDels | 0.816919 | Inf      | 0.005762 | Inf      |
| chr11:125746831-125774417 | 1   | 0  | MicroHSDels | 0.816919 | Inf      | 0.005762 | Inf      |
| chr16:74087525-74134014   | 1   | 1  | MicroHSDels | 0.966529 | 0.223961 | 0.002858 | 17.59861 |
| chr19:58288427-58600264   | 1   | 0  | MicroHSDels | 0.816919 | Inf      | 0.005762 | Inf      |
| chr2:178421751-178469907  | 1   | 0  | MicroHSDels | 0.816919 | Inf      | 0.005762 | Inf      |
| chr2:213915176-213944138  | 1   | 0  | MicroHSDels | 0.816919 | Inf      | 0.005762 | Inf      |
| chr3:162173742-162208106  | 1   | 0  | MicroHSDels | 0.816919 | Inf      | 0.005762 | Inf      |
| chr4:38475453-38505894    | 1   | 0  | MicroHSDels | 0.816919 | Inf      | 0.005762 | Inf      |
| chr4:54793337-54817034    | 1   | 0  | MicroHSDels | 0.816919 | Inf      | 0.005762 | Inf      |
| chr4:54793337-54838343    | 1   | 0  | MicroHSDels | 0.816919 | Inf      | 0.005762 | Inf      |
| chr6:26511226-26555479    | 1   | 1  | MicroHSDels | 0.966529 | 0.223961 | 0.002858 | 17.59861 |
| chr8:15141259-16659481    | 1   | 0  | MicroHSDels | 0.816919 | Inf      | 0.005762 | Inf      |
| chr19:58597470-58650878   | 2   | 0  | MicroHSDels | 0.66731  | Inf      | 0.042067 | Inf      |
| chr19:62569652-62601491   | 2   | 0  | MicroHSDels | 0.66731  | Inf      | 0.042067 | Inf      |
| chr2:232719656-232757154  | 2   | 0  | MicroHSDels | 0.66731  | Inf      | 0.042067 | Inf      |
| chr20:60848-94170         | 2   | 0  | MicroHSDels | 0.66731  | Inf      | 0.042067 | Inf      |
| chr6:52726617-52774620    | 2   | 1  | MicroHSDels | 0.911807 | 0.447936 | 0.023283 | 26.46388 |
| chr9:17251976-17280216    | 2   | 0  | MicroHSDels | 0.66731  | Inf      | 0.042067 | Inf      |
| chr11:56097952-56139937   | 3   | 1  | MicroHSDels | 0.844715 | 0.67205  | 0.053856 | 35.33607 |
| chr11:56072176-56116063   | 4   | 0  | MicroHSDels | 0.445176 | Inf      | 0.14783  | Inf      |
| chr12:51128713-51156641   | 4   | 0  | MicroHSDels | 0.445176 | Inf      | 0.14783  | Inf      |
| chr19:58634062-58677821   | 4   | 1  | MicroHSDels | 0.771601 | 0.896294 | 0.08846  | 44.21515 |
| chr6:52755032-52800115    | 7   | 1  | MicroHSDels | 0.553835 | 1.570119 | 0.201096 | 70.87615 |
| chr17:36753663-36778230   | 9   | 0  | MicroHSDels | 0.161623 | Inf      | 0.442469 | Inf      |
| chr8:71769142-71815740    | 11  | 1  | MicroHSDels | 0.325397 | 2.470979 | 0.357849 | 106.5229 |

|                           |    |    |             |          |          |          |          |
|---------------------------|----|----|-------------|----------|----------|----------|----------|
| chr9:5289794-5332656      | 24 | 8  | MicroHSDels | 0.884644 | 0.669363 | 0.289077 | 1.73274  |
| chr17:36461664-36478593   | 63 | 17 | MicroHSDels | 0.800902 | 0.826354 | 0.473191 | 1.518468 |
| chr8:48483461-48750000    | 0  | 1  | MicroHSDels | 1        | 0        | 0        | 8.740345 |
| chr1:172813690-172929227  | 1  | 0  | MicroHSDups | 0.816919 | Inf      | 0.005762 | Inf      |
| chr1:31178042-31198047    | 1  | 0  | MicroHSDups | 0.816919 | Inf      | 0.005762 | Inf      |
| chr11:125746831-125774417 | 1  | 0  | MicroHSDups | 0.816919 | Inf      | 0.005762 | Inf      |
| chr11:86628362-87450467   | 1  | 0  | MicroHSDups | 0.816919 | Inf      | 0.005762 | Inf      |
| chr13:51119056-51167168   | 1  | 0  | MicroHSDups | 0.816919 | Inf      | 0.005762 | Inf      |
| chr13:66468619-66503012   | 1  | 0  | MicroHSDups | 0.816919 | Inf      | 0.005762 | Inf      |
| chr15:97274780-97826232   | 1  | 0  | MicroHSDups | 0.816919 | Inf      | 0.005762 | Inf      |
| chr16:68923105-68964107   | 1  | 0  | MicroHSDups | 0.816919 | Inf      | 0.005762 | Inf      |
| chr16:68924395-68961849   | 1  | 0  | MicroHSDups | 0.816919 | Inf      | 0.005762 | Inf      |
| chr17:11687163-11709471   | 1  | 0  | MicroHSDups | 0.816919 | Inf      | 0.005762 | Inf      |
| chr17:36753663-36778230   | 1  | 0  | MicroHSDups | 0.816919 | Inf      | 0.005762 | Inf      |
| chr19:58288427-58600264   | 1  | 0  | MicroHSDups | 0.816919 | Inf      | 0.005762 | Inf      |
| chr3:58773011-58810951    | 1  | 0  | MicroHSDups | 0.816919 | Inf      | 0.005762 | Inf      |
| chr8:88455946-88680000    | 1  | 0  | MicroHSDups | 0.816919 | Inf      | 0.005762 | Inf      |
| chr9:93399807-95962364    | 1  | 0  | MicroHSDups | 0.816919 | Inf      | 0.005762 | Inf      |
| chr11:107733766-107757732 | 2  | 0  | MicroHSDups | 0.66731  | Inf      | 0.042067 | Inf      |
| chr17:36461664-36478593   | 2  | 0  | MicroHSDups | 0.66731  | Inf      | 0.042067 | Inf      |
| chr19:61398731-61435513   | 2  | 0  | MicroHSDups | 0.66731  | Inf      | 0.042067 | Inf      |
| chr2:116261115-116290283  | 2  | 0  | MicroHSDups | 0.66731  | Inf      | 0.042067 | Inf      |
| chr3:144245009-144290782  | 2  | 0  | MicroHSDups | 0.66731  | Inf      | 0.042067 | Inf      |
| chr9:95888470-95919186    | 2  | 0  | MicroHSDups | 0.66731  | Inf      | 0.042067 | Inf      |
| chr11:94395668-94425793   | 3  | 0  | MicroHSDups | 0.545061 | Inf      | 0.09253  | Inf      |
| chr2:116241694-116394317  | 3  | 0  | MicroHSDups | 0.545061 | Inf      | 0.09253  | Inf      |
| chr19:58634062-58677821   | 8  | 4  | MicroHSDups | 0.948148 | 0.446652 | 0.119177 | 2.033917 |
| chr9:5289794-5332656      | 10 | 1  | MicroHSDups | 0.374287 | 2.245512 | 0.318355 | 97.60173 |
| chr16:74087525-74134014   | 41 | 8  | MicroHSDups | 0.445431 | 1.150912 | 0.528909 | 2.858146 |
| chr15:60080019-60101128   | 0  | 1  | MicroHSDups | 1        | 0        | 0        | 8.740345 |
| chr22:43632564-43642175   | 1  | 0  | MiniHSDels  | 0.816919 | Inf      | 0.005762 | Inf      |

|                          |   |   |            |          |          |          |          |
|--------------------------|---|---|------------|----------|----------|----------|----------|
| chr3:187109666-187192347 | 1 | 0 | MiniHSDels | 0.816919 | Inf      | 0.005762 | Inf      |
| chr5:150255197-150291579 | 1 | 1 | MiniHSDels | 0.966529 | 0.223961 | 0.002858 | 17.59861 |
| chr6:29150022-29251227   | 1 | 0 | MiniHSDels | 0.816919 | Inf      | 0.005762 | Inf      |
| chr6:57016532-57067336   | 1 | 0 | MiniHSDels | 0.816919 | Inf      | 0.005762 | Inf      |
| chr7:149750000-149955000 | 1 | 0 | MiniHSDels | 0.816919 | Inf      | 0.005762 | Inf      |
| chr6:29170622-29251227   | 3 | 1 | MiniHSDels | 0.844715 | 0.67205  | 0.053856 | 35.33607 |
| chr6:29649385-29664662   | 3 | 2 | MiniHSDels | 0.954387 | 0.335569 | 0.038372 | 4.025953 |
| chr6:57019262-57064537   | 3 | 1 | MiniHSDels | 0.844715 | 0.67205  | 0.053856 | 35.33607 |
| chr2:73679654-73757822   | 9 | 0 | MiniHSDels | 0.161623 | Inf      | 0.442469 | Inf      |
| chr19:63022929-63057804  | 1 | 0 | MiniHSDups | 0.816919 | Inf      | 0.005762 | Inf      |
| chr6:57019262-57064537   | 1 | 0 | MiniHSDups | 0.816919 | Inf      | 0.005762 | Inf      |
| chr6:57016532-57067336   | 8 | 1 | MiniHSDups | 0.487144 | 1.80006  | 0.240627 | 80.02642 |
| chr7:65735947-65777648   | 2 | 0 | MiniHSDups | 0.66731  | Inf      | 0.042067 | Inf      |
| chr19:58021000-58078109  | 3 | 0 | MiniHSDups | 0.545061 | Inf      | 0.09253  | Inf      |
| chr2:234158915-234230618 | 0 | 1 | MiniHSDups | 1        | 0        | 0        | 8.740345 |

Note that none of the non-SD hotspot events were significantly enriched in cases compared to controls. Burden for smaller hotspot CNVs in cases versus controls: total in cases=490/2,588 versus 94/580; Fisher's exact test,  $p=0.13$ , OR=1.2.

**Table S10. Novel gene-disrupting smaller hotspot events exclusive to autism cases**

| Chr  | Start     | End       | Size   | Sample    | Region  | Breaking genes        | Event | Inheritance | Control probes | Control CNVs |
|------|-----------|-----------|--------|-----------|---------|-----------------------|-------|-------------|----------------|--------------|
| chr1 | 31178042  | 31198047  | 20005  | AU020705  | 1p35.2  | <i>PUM1</i>           | Dup   | Paternal    | 9              | 0            |
| chr1 | 172813690 | 172929227 | 115537 | 14019.p1  | 1q25.1  | <i>RABGAP1L</i>       | Dup   | Maternal    | 35             | 0            |
| chr1 | 237850754 | 237872118 | 21364  | 12162.p1  | 1q43    | <i>CHRM3</i>          | Del   | Paternal    | 12             | 1            |
| chr2 | 213921245 | 213939591 | 18346  | 12239.p1  | 2q34    | <i>SPAG16</i>         | Dup   | Maternal    | 7              | 0            |
| chr2 | 232719656 | 232757154 | 37498  | 13551.p1  | 2q37.1  | <i>DIS3L2</i>         | Del   | Paternal    | 10             | 0            |
| chr2 | 232719656 | 232757154 | 37498  | 12392.p1  | 2q37.1  | <i>DIS3L2</i>         | Del   | n/a         | 10             | 0            |
| chr3 | 49900360  | 50063973  | 163613 | 11415.p1  | 3p21.31 | <i>MONA, RBM6</i>     | Dup   | Maternal    | 84             | 0            |
| chr3 | 58773011  | 58810951  | 37940  | 14265.p1  | 3p14.2  | <i>C3Orf67</i>        | Dup   | Maternal    | 12             | 0            |
| chr3 | 144245009 | 144290782 | 45773  | 12831.p1  | 3q23    | <i>U2SURP</i>         | Dup   | Paternal    | 11             | 0            |
| chr3 | 144245009 | 144290782 | 45773  | 11948.p1  | 3q23    | <i>U2SURP</i>         | Dup   | Paternal    | 11             | 0            |
| chr4 | 38475453  | 38505894  | 30441  | 14059.p1  | 4p14    | <i>TLR1, TLR6</i>     | Del   | Paternal    | 35             | 0            |
| chr4 | 54793337  | 54838343  | 45006  | AU055005  | 4q12    | <i>PDGFRA</i>         | Del   | Maternal    | 10             | 0            |
| chr5 | 178871628 | 179015299 | 143671 | 13341.p1  | 5q35.3  | <i>RUFY1</i>          | Dup   | Maternal    | 62             | 0            |
| chr6 | 64845481  | 64864129  | 18648  | AU029303  | 6q12    | <i>EYS</i>            | Del   | Maternal    | 2              | 1            |
| chr6 | 107250000 | 107630000 | 380000 | 12212.p1  | 6q21    | <i>PDSS2</i>          | Del   | Paternal    | 182            | 0            |
| chr6 | 107250000 | 107630000 | 88731  | AU0039301 | 6q21    | <i>BEND3</i>          | Del   | Maternal    | 37             | 0            |
| chr7 | 5595608   | 5889320   | 293712 | 11121.p1  | 7p22.1  | <i>RNF216</i>         | Dup   | Maternal    | 113            | 0            |
| chr7 | 5738853   | 5871832   | 132979 | 12894.p1  | 7p22.1  | <i>RNF216</i>         | Dup   | Maternal    | 54             | 0            |
| chr7 | 5738853   | 5871832   | 132979 | 13651.p1  | 7p22.1  | <i>RNF216</i>         | Dup   | Paternal    | 54             | 0            |
| chr7 | 5738853   | 5871832   | 132979 | 13906.p1  | 7p22.1  | <i>RNF216</i>         | Del   | De novo     | 54             | 0            |
| chr7 | 5738853   | 5871832   | 132979 | 13995.p1  | 7p22.1  | <i>RNF216</i>         | Del   | Paternal    | 54             | 0            |
| chr7 | 5790188   | 5870000   | 79812  | AU2157301 | 7p22.1  | <i>No gene breaks</i> | Del   | Paternal    | 40             | 0            |
| chr7 | 133870079 | 133915213 | 45134  | 13503.p1  | 7q33    | <i>AKR1B10</i>        | Dup   | Maternal    | 17             | 0            |
| chr7 | 133870079 | 133915213 | 45134  | 13174.p1  | 7q33    | <i>AKR1B10</i>        | Dup   | Maternal    | 17             | 0            |
| chr8 | 38158036  | 38286608  | 128572 | AU1631301 | 8p12    | <i>WHSC1L1, BAG4</i>  | Dup   | Maternal    | 60             | 0            |
| chr9 | 95888470  | 95919186  | 30716  | 13671.p1  | 9q22.31 | <i>PTPDC1</i>         | Dup   | Maternal    | 15             | 0            |
| chr9 | 95888470  | 95919186  | 30716  | 14486.p1  | 9q22.32 | <i>PTPDC1</i>         | Dup   | Paternal    | 15             | 0            |

|       |           |           |        |           |          |                       |     |          |     |   |
|-------|-----------|-----------|--------|-----------|----------|-----------------------|-----|----------|-----|---|
| chr10 | 12127247  | 12207883  | 80636  | 13990.p1  | 10p14    | <i>DHTKD1</i>         | Dup | Paternal | 35  | 0 |
| chr10 | 12127247  | 12207883  | 80636  | 14209.p1  | 10p14    | <i>DHTKD1</i>         | Dup | Maternal | 35  | 0 |
| chr10 | 12127247  | 12207883  | 80636  | AU022704  | 10p14    | <i>DHTKD1</i>         | Dup | n/a      | 35  | 0 |
| chr11 | 94395668  | 94425793  | 30125  | 11227.p1  | 11q21    | <i>KDM4DL</i>         | Dup | Maternal | 18  | 0 |
| chr11 | 94395668  | 94425793  | 30125  | 14354.p1  | 11q21    | <i>KDM4DL</i>         | Dup | Maternal | 18  | 0 |
| chr11 | 94395668  | 94425793  | 30125  | 13612.p1  | 11q21    | <i>KDM4DL</i>         | Dup | Paternal | 18  | 0 |
| chr11 | 107733766 | 107757732 | 23966  | 11044.p1  | 11q22.3  | <i>ATM</i>            | Dup | Paternal | 9   | 0 |
| chr11 | 107733766 | 107757732 | 23966  | 11433.p1  | 11q22.3  | <i>ATM</i>            | Dup | Paternal | 9   | 0 |
| chr11 | 107733766 | 107757732 | 23966  | 12211.p1  | 11q22.3  | <i>ATM</i>            | Dup | Paternal | 9   | 0 |
| chr11 | 125746831 | 125774417 | 27586  | AU1686301 | 11q24.2  | <i>ST3GAL4</i>        | Dup | Paternal | 11  | 0 |
| chr11 | 125746831 | 125774417 | 27586  | AU2050301 | 11q24.2  | <i>ST3GAL4</i>        | Del | Maternal | 11  | 0 |
| chr12 | 54935839  | 55210466  | 274627 | 13006.p1  | 12q13.2  | <i>RBMS2, CS</i>      | Dup | Paternal | 153 | 0 |
| chr15 | 64375665  | 64479422  | 103757 | 11734.p1  | 15q22.31 | <i>DIS3L, MAP2K1</i>  | Dup | Maternal | 46  | 0 |
| chr16 | 68923105  | 68964107  | 41002  | AU1699302 | 16q22.1  | <i>DDX19A</i>         | Dup | Maternal | 26  | 0 |
| chr16 | 68924395  | 68961849  | 37454  | AU1300302 | 16q22.1  | <i>DDX19</i>          | Dup | Paternal | 22  | 0 |
| chr17 | 902154    | 1567639   | 665485 | 14226.p1  | 17p13.3  | <i>TLCD2, ABR</i>     | Dup | De novo  | 471 | 0 |
| chr17 | 987984    | 1250631   | 262647 | AU1575302 | 17p13.3  | <i>YWHAE, ABR</i>     | Dup | Paternal | 147 | 0 |
| chr19 | 2769955   | 3461478   | 691523 | 14458.p1  | 19p13.3  | <i>GNA15, ZNF556</i>  | Del | n/a      | 401 | 0 |
| chr19 | 2777247   | 2838715   | 61468  | 14491.p1  | 19p13.3  | <i>ZNF554</i>         | Del | Paternal | 42  | 0 |
| chr19 | 58288427  | 58600264  | 311837 | 11233.p1  | 19q13.41 | <i>ZNF415</i>         | Dup | Paternal | 190 | 0 |
| chr19 | 58288427  | 58600264  | 311837 | AU1400301 | 19q13.41 | <i>ZNF415</i>         | Del | Maternal | 190 | 0 |
| chr19 | 60121654  | 60273674  | 152020 | 12960.p1  | 19q13.42 | <i>RDH13</i>          | Dup | De novo  | 124 | 0 |
| chr19 | 61398731  | 61435513  | 36782  | 14046.p1  | 19q13.42 | <i>No gene breaks</i> | Dup | Paternal | 12  | 0 |
| chr19 | 61398731  | 61435513  | 36782  | AU1107301 | 19q13.42 | <i>No gene breaks</i> | Dup | n/a      | 12  | 0 |
| chr19 | 63295548  | 63370953  | 75405  | 12716.p1  | 19p13.42 | <i>ZSCAN18</i>        | Dup | Paternal | 30  | 0 |
| chr20 | 3725594   | 3842583   | 116989 | 13664.p1  | 20p13    | <i>CDC25B, PANK2</i>  | Dup | Maternal | 95  | 0 |
| chr20 | 3725594   | 3842583   | 116989 | AU022704  | 20p13    | <i>SIGLEC1, PANK2</i> | Dup | n/a      | 95  | 0 |
| chr20 | 33776065  | 33833342  | 57277  | 14473.p1  | 20q11.22 | <i>RBM39, PHF20</i>   | Dup | n/a      | 17  | 0 |
| chr20 | 33839309  | 34020687  | 181378 | 13782.p1  | 20q11.22 | <i>PHF20</i>          | Dup | Maternal | 51  | 0 |



| q11.23             |           |           |         |           |                  |                           |     |          |      |   |
|--------------------|-----------|-----------|---------|-----------|------------------|---------------------------|-----|----------|------|---|
| chr20              | 51520021  | 51561726  | 41705   | AU1512301 | 20q13.2          | <i>TSHZ2</i>              | Dup | Maternal | 15   | 0 |
| chr22              | 36230567  | 36730248  | 499681  | 14440.p1  | 22q13            | <i>CARD10</i>             | Dup | Paternal | 290  | 0 |
| chr22              | 36277660  | 36330258  | 52598   | AU3068301 | 22q13            | <i>No gene breaks</i>     | Dup | Paternal |      |   |
| chr10 <sup>a</sup> | 100703151 | 100940746 | 237595  | AU1959302 | 10q24.2          | <i>HPSE2</i>              | Del | Paternal | 62   | 0 |
| chr11 <sup>a</sup> | 86628362  | 87450467  | 822105  | 13631.p1  | 11q14.2          | <i>TMEM135</i>            | Dup | De novo  | 321  | 0 |
| chr15 <sup>a</sup> | 97274780  | 97826232  | 551452  | 14443.p1  | 15q26.3          | <i>IGF1R</i>              | Dup | De novo  | 327  | 1 |
| chr17 <sup>a</sup> | 5962718   | 7286326   | 1323608 | 11532.p1  | 17p13.1p<br>13.2 | <i>NLGN2</i>              | Dup | De novo  | 869  | 0 |
| chr19 <sup>a</sup> | 7970001   | 8780000   | 809999  | 12426.p1  | 19p13.2          | <i>FBN1, MYO1F</i>        | Del | Maternal | 442  | 0 |
| chr2 <sup>a</sup>  | 116241694 | 116394317 | 152623  | 13103.p1  | 2q14.2           | <i>DPP10</i>              | Dup | Paternal | 56   | 0 |
| chr2 <sup>a</sup>  | 116241694 | 116394317 | 152623  | 13418.p1  | 2q14.2           | <i>DPP10</i>              | Dup | Paternal | 56   | 0 |
| chr2 <sup>a</sup>  | 116241694 | 116394317 | 152623  | 14013.p1  | 2q14.2           | <i>DPP10</i>              | Dup | Paternal | 56   | 0 |
| chr2 <sup>a</sup>  | 116261115 | 116290283 | 29168   | 11324.p1  | 2q14.2           | <i>DPP10</i>              | Dup | Maternal | 8    | 0 |
| chr2 <sup>a</sup>  | 178421751 | 178469907 | 48156   | 12529.p1  | 2q31.2           | <i>PDE11A</i>             | Del | Paternal | 14   | 0 |
| chr20 <sup>a</sup> | 60848     | 94170     | 33322   | 11558.p1  | 20p13            | <i>DEFB125 cluster</i>    | Del | Paternal | 25   | 0 |
| chr20 <sup>a</sup> | 60848     | 94170     | 33322   | 13014.p1  | 20p13            | <i>DEFB125 cluster</i>    | Del | Paternal | 25   | 0 |
| chr22 <sup>a</sup> | 38773641  | 39148257  | 374616  | 12224.p1  | 22q13            | <i>SGSM3, GRAP2</i>       | Del | De novo  | 143  | 0 |
| chr5 <sup>a</sup>  | 1.37E+08  | 1.38E+08  | 691037  | 14478.p1  | 5q31.2           | <i>CTNNA1, NME5</i>       | Dup | De novo  | 307  | 0 |
| chr8 <sup>a</sup>  | 15141259  | 16659481  | 1518222 | 11501.p1  | 8p22             | <i>TUSC3</i>              | Del | Maternal | 941  | 0 |
| chr9 <sup>a</sup>  | 93399807  | 95962364  | 2562557 | 13727.p1  | 9q22.31          | <i>PTPDC1</i>             | Dup | De novo  | 1095 | 0 |
| chr9 <sup>a</sup>  | 129863151 | 130919094 | 1055943 | 12235.p1  | 9q34             | <i>CRAT,<br/>SLC25A25</i> | Dup | De novo  | 660  | 0 |

<sup>a</sup>Indicates hotspot-associated rearrangements. None of the events were observed in controls assayed using our hotspot-targeted array (N=580). Control events, defined here as CNVs that appear to be mediated by the repeat sequences of the hotspot, were identified from population controls ran on Illumina 1M SNP array platform (N=2,090) (Cooper et al., 2011).

**Table S11. Exon-disrupting CNVs for autism candidate genes**

| Candidate gene(s) | Genomic coordinates (hg18) | Size (bp) | Samples   | Gene breaking | CNV | Inheritance <sup>a</sup> | WTCCC Control Probes |
|-------------------|----------------------------|-----------|-----------|---------------|-----|--------------------------|----------------------|
| <i>A2BP1</i>      | chr16:6926113-7087773      | 161,660   | AU1393301 | yes           | Del | Maternal                 | 88                   |
| <i>A2BP1</i>      | chr16:7049351-7151263      | 101,912   | AU015903  | yes           | Del | Maternal                 | 97                   |
| <i>A2BP1</i>      | chr16:6745494-6846684      | 101190    | 11464.p1  | yes           | Del | Maternal                 | 74                   |
| <i>A2BP1</i>      | chr16:7506551-7592706      | 86,155    | 13861.p1  | yes           | Del | Maternal                 | 95                   |
| <i>A2BP1</i>      | chr16:7044796-7066958      | 22,162    | 14073.p1  | yes           | Del | Maternal                 | 12                   |
| <i>A2BP1</i>      | chr16:6306867-6328849      | 21,982    | 13414.p1  | yes           | Del | Maternal                 | 13                   |
| <i>ANOS</i>       | chr11:21806758-26716891    | 4,910,133 | 12066.p1  | no            | Dup | Maternal                 | 2036                 |
| <i>CACNA2D3</i>   | chr3:54575478-54781732     | 206,254   | 13358.p1  | yes           | Del | Maternal                 | 92                   |
| <i>CADPS2</i>     | chr7:121509923-121938724   | 428,801   | 11026.p1  | yes           | Dup | Paternal                 | 143                  |
| <i>CNR1</i>       | chr6:88898857-88923579     | 24,722    | 12279.p1  | yes           | Dup | n/a                      | 21                   |
| <i>CNR1</i>       | chr6:88898857-88923579     | 24,722    | AU2831301 | yes           | Dup | Maternal                 | 21                   |
| <i>CNR1</i>       | chr6:88898857-88910225     | 11,368    | 13890.p1  | yes           | Dup | Maternal                 | 13                   |
| <i>CNR1</i>       | chr6:88898857-88923579     | 24,722    | 11368.p1  | yes           | Dup | Maternal                 | 21                   |
| <i>CNR1</i>       | chr6:88898857-88923579     | 24,722    | AU1379301 | yes           | Dup | Maternal                 | 21                   |
| <i>CNR1</i>       | chr6:88898857-88923579     | 24,722    | 13481.p1  | yes           | Dup | Paternal                 | 21                   |
| <i>CNR1</i>       | chr6:88898857-88923579     | 24,722    | 13822.p1  | yes           | Dup | Paternal                 | 21                   |
| <i>CNR1</i>       | chr6:88898857-88923579     | 24,722    | control   | yes           | Dup | n/a                      | 21                   |
| <i>CNTNAP2</i>    | chr7:144778600-145608237   | 829,637   | 13568.p1  | yes           | Dup | Maternal                 | 269                  |
| <i>CNTNAP2</i>    | chr7:147660726-147707361   | 46,635    | 13395.p1  | yes           | Del | Paternal                 | 45                   |
| <i>CTNNA3</i>     | chr10:67981151-68126494    | 145,343   | 13001.p1  | yes           | Del | De novo                  | 72                   |
| <i>CTNNA3</i>     | chr10:67726795-67869383    | 142,588   | 12108.p1  | yes           | Del | Maternal                 | 80                   |
| <i>CTNNA3</i>     | chr10:67726795-67869383    | 142,588   | 13557.p1  | yes           | Del | Maternal                 | 80                   |
| <i>CTNNA3</i>     | chr10:67981151-68085796    | 104,645   | 13494.p1  | yes           | Del | Maternal                 | 46                   |
| <i>CTNNA3</i>     | chr10:67953343-68029641    | 76,298    | AU1391302 | yes           | Del | Maternal                 | 30                   |
| <i>CTNNA3</i>     | chr10:68186325-68228806    | 42,481    | 11232.p1  | yes           | Del | Maternal                 | 20                   |
| <i>CTNNA3</i>     | chr10:67953343-68167013    | 213670    | 11711.p1  | yes           | Del | Paternal                 | 100                  |
| <i>CTNNA3</i>     | chr10:67992425-68186725    | 194,300   | 13619.p1  | yes           | Del | Paternal                 | 95                   |
| <i>CTNNA3</i>     | chr10:67953343-68114041    | 160,698   | 13043.p1  | yes           | Del | Paternal                 | 79                   |
| <i>CTNNA3</i>     | chr10:67726795-67869383    | 142,588   | 11463.p1  | yes           | Del | Paternal                 | 80                   |
| <i>CTNNA3</i>     | chr10:67726795-67869383    | 142,588   | 12153.p1  | yes           | Del | Paternal                 | 80                   |
| <i>CTNNA3</i>     | chr10:68029241-68126494    | 97,253    | 11156.p1  | yes           | Del | Paternal                 | 51                   |
| <i>CTNNA3</i>     | chr10:67932135-68018603    | 86,468    | 11299.p1  | yes           | Del | Paternal                 | 37                   |
| <i>CTNNA3</i>     | chr10:67992425-68064617    | 72,192    | 13005.p1  | yes           | Del | Paternal                 | 33                   |

|                          |                           |           |           |     |     |          |      |
|--------------------------|---------------------------|-----------|-----------|-----|-----|----------|------|
| <i>CTNNA3</i>            | chr10:68018203-68085796   | 67,593    | 13541.p1  | yes | Del | Paternal | 29   |
| <i>CTNNA3</i>            | chr10:67525235-67568916   | 43,681    | 13526.p1  | yes | Del | Paternal | 17   |
| <i>CTNNA3</i>            | chr10:67992425-68283921   | 291,496   | 14487.p1  | yes | Del | Paternal | 149  |
| <i>CTNNA3</i>            | chr10:67881357-68018603   | 137,246   | AU0911301 | yes | Dup | n/a      | 58   |
| <i>CTNNA3</i>            | chr10:68046321-68155756   | 109,435   | AU0946302 | yes | Del | Paternal | 57   |
| <i>CTNNA3</i>            | chr10:67843269-67932535   | 89,266    | 14260.p1  | yes | Del | Paternal | 34   |
| <i>CTNNA3</i>            | chr10:67992425-68077952   | 85,527    | 13997.p1  | yes | Del | Maternal | 40   |
| <i>CTNNA3</i>            | chr10:68029241-68064617   | 35,376    | 13658.p1  | yes | Del | Paternal | 17   |
| <i>CTNNA3</i>            | chr10:67726795-67921741   | 194,946   | control   | yes | Del | n/a      | 101  |
| <i>CTNNA3</i>            | chr10:67953343-68018603   | 65,260    | control   | yes | Del | n/a      | 26   |
| <i>CTNNA3</i>            | chr10:68029241-68064617   | 35,376    | control   | yes | Del | n/a      | 17   |
| <i>CTNNA3</i>            | chr10:68097560-68316501   | 218,941   | control   | yes | Del | n/a      | 117  |
| <i>CTNND2</i>            | chr5:11398907-11491980    | 93073     | 12289.p1  | yes | Del | De novo  | 63   |
| <i>DIAPH3</i>            | chr13:59572895-59589781   | 16,886    | 12628.p1  | yes | Del | Maternal | 5    |
| <i>DISC1</i>             | chr1:229898644-229999798  | 101,154   | 11712.p1  | yes | Del | Maternal | 45   |
| <i>DISC1</i>             | chr1:228187721-230201264  | 2,013,543 | 12162.p1  | yes | Del | Paternal | 1066 |
| <i>DNAH5</i>             | chr5:13855108-14232579    | 377,471   | 11710.p1  | yes | Dup | Paternal | 242  |
| <i>DOCK1</i>             | chr10:128130613-135228892 | 7,098,279 | 14091.p1  | no  | Del | De novo  | 4385 |
| <i>DOCK1</i>             | chr10:128775742-128905024 | 129,282   | 14002.p1  | yes | Del | Paternal | 67   |
| <i>DPP10</i>             | chr2:115810880-116702422  | 891,542   | 11033.p1  | yes | Dup | Maternal | 291  |
| <i>DPP10<sup>b</sup></i> | chr2:116261115-116290283  | 29,168    | 11324.p1  | yes | Dup | Maternal | 8    |
| <i>DPP10<sup>b</sup></i> | chr2:116241694-116394317  | 152,623   | 13103.p1  | yes | Dup | Paternal | 56   |
| <i>DPP10<sup>b</sup></i> | chr2:116241694-116394317  | 152,623   | 13418.p1  | yes | Dup | Paternal | 56   |
| <i>DPP10<sup>b</sup></i> | chr2:116241694-116394317  | 152,623   | 14013.p1  | yes | Dup | Paternal | 56   |
| <i>DPP6</i>              | chr7:153590919-154251382  | 660,463   | 11843.p1  | yes | Del | Maternal | 404  |
| <i>DPP6</i>              | chr7:153084786-153282406  | 197,620   | AU079104  | yes | Dup | Maternal | 73   |
| <i>DPP6</i>              | chr7:153388658-153569013  | 180,355   | 12351.p1  | yes | Dup | Maternal | 61   |
| <i>DPP6<sup>b</sup></i>  | chr7:152168193-153286018  | 1,117,825 | 12185.p1  | yes | Dup | Paternal | 504  |
| <i>DPP6</i>              | chr7:153117996-153291033  | 173,037   | AU025803  | yes | Dup | Maternal | 72   |
| <i>DPP6</i>              | chr7:153095638-153385049  | 289,411   | control   | yes | Dup | n/a      | 84   |
| <i>EML1</i>              | chr14:99464769-99483955   | 19,186    | AU012204  | yes | Dup | n/a      | 10   |
| <i>EML1</i>              | chr14:99464769-99483955   | 19,186    | AU022203  | yes | Dup | Paternal | 10   |
| <i>EML1</i>              | chr14:99464769-99483955   | 19,186    | AU071803  | yes | Dup | Paternal | 10   |
| <i>EML1</i>              | chr14:99464769-99483955   | 19,186    | AU1053302 | yes | Dup | n/a      | 10   |
| <i>EPHA6</i>             | chr3:96570608-100896278   | 4,325,670 | 14204.p1  | no  | Dup | Maternal | 1384 |
| <i>ERBB4</i>             | chr2:212770528-213122490  | 351,962   | 11811.p1  | yes | Del | Maternal | 181  |

|                             |                          |           |           |     |     |          |      |
|-----------------------------|--------------------------|-----------|-----------|-----|-----|----------|------|
| <i>F13A1</i>                | chr6:5840343-6112556     | 272,213   | 14442.p1  | yes | Dup | De novo  | 161  |
| <i>FHIT</i>                 | chr3:60530016-60800676   | 270,660   | 12058.p1  | yes | Del | De novo  | 186  |
| <i>FHIT</i>                 | chr3:58463257-60148958   | 1,685,701 | AU2554301 | yes | Dup | Maternal | 948  |
| <i>FHIT</i>                 | chr3:60768687-66402436   | 5,633,749 | 13830.p1  | yes | Del | De novo  | 2735 |
| <i>FOXP1</i>                | chr3:71209239-71450066   | 240,827   | AU1718301 | yes | Del | n/a      | 110  |
| <i>FOXP1, SUCLG2</i>        | chr3:67226398-72324318   | 5,097,920 | 12032.p1  | no  | Del | Maternal | 2068 |
| <i>GABRB3</i>               | chr15:24521070-25133204  | 612,134   | 13355.p1  | yes | Dup | De novo  | 308  |
| <i>GALNT13</i>              | chr2:154968071-154990525 | 22,454    | 14184.p1  | yes | Del | Paternal | 8    |
| <i>GIMAP8</i>               | chr7:149764636-149968584 | 203,948   | AU016204  | no  | Del | Paternal | 90   |
| <i>GPC6</i>                 | chr13:93475099-93551130  | 76,031    | AU1165302 | yes | Del | n/a      | 24   |
| <i>GRID2</i>                | chr4:93501225-94634131   | 1,132,906 | AU1286301 | yes | Dup | De novo  | 328  |
| <i>GRID2</i>                | chr4:93607735-93750838   | 143,104   | 13638.p1  | yes | Del | Paternal | 44   |
| <i>GRIN2A</i>               | chr16:9999349-10427936   | 428,587   | AU063004  | yes | Dup | Maternal | 217  |
| <i>HYDIN<sup>b</sup></i>    | chr16:68859156-72903506  | 4,044,350 | 12691.p1  | no  | Del | De novo  | 1811 |
| <i>HYDIN<sup>b</sup></i>    | chr16:68832773-70006429  | 1,173,656 | AU1551302 | no  | Dup | Paternal | 512  |
| <i>HYDIN<sup>b</sup></i>    | chr16:68883052-69808186  | 925,134   | 13769.p1  | yes | Dup | De novo  | 395  |
| <i>IARS</i>                 | chr9:93459971-95893617   | 2,433,646 | 13727.p1  | no  | Dup | De novo  | 1008 |
| <i>IARS</i>                 | chr9:94077839-94124216   | 46,377    | 14039.p1  | yes | Dup | Paternal | 21   |
| <i>ICAI, NXPPI</i>          | chr7:8148775-8495272     | 346,497   | 14195.p1  | yes | Dup | Paternal | 205  |
| <i>ICAI, NXPPI</i>          | chr7:8148775-8495272     | 346,497   | AU003705  | yes | Dup | Paternal | 205  |
| <i>ICAI, NXPPI</i>          | chr7:8159219-8461473     | 302,254   | AU1081301 | yes | Dup | Paternal | 183  |
| <i>IQGAP2</i>               | chr5:75865663-75950687   | 85,024    | AU0980302 | yes | Del | Paternal | 50   |
| <i>KANK1<sup>b</sup></i>    | chr9:193904-1655435      | 1,461,531 | 14349.p1  | no  | Dup | Maternal | 1206 |
| <i>KANK1</i>                | chr9:418382-593694       | 175,312   | 13879.p1  | yes | Del | Maternal | 176  |
| <i>KANK1</i>                | chr9:425727-499569       | 73,842    | AU1483302 | yes | Del | Maternal | 62   |
| <i>KANK1</i>                | chr9:329883-524731       | 194,848   | 11630.p1  | yes | Dup | Maternal | 189  |
| <i>KANK1</i>                | chr9:622915-1053928      | 431,013   | 12316.p1  | yes | Dup | Paternal | 330  |
| <i>KANK1</i>                | chr9:162164-546825       | 384,661   | AU1496302 | yes | Dup | Paternal | 351  |
| <i>KANK1</i>                | chr9:524331-730114       | 205,783   | 11909.p1  | yes | Dup | Paternal | 240  |
| <i>KANK1</i>                | chr9:406092-607282       | 201,190   | AU001505  | yes | Dup | Paternal | 214  |
| <i>KANK1</i>                | chr9:524331-803740       | 279,409   | control   | yes | Dup | n/a      | 293  |
| <i>KHDRBS2</i>              | chr6:57643044-62975372   | 5,332,328 | 13521.p1  | yes | Dup | Maternal | 511  |
| <i>KHDRBS2</i>              | chr6:57591164-62500813   | 4,909,649 | 12430.p1  | yes | Dup | Maternal | 400  |
| <i>KHDRBS2</i>              | chr6:62694594-62985285   | 290,691   | AU062003  | yes | Dup | Paternal | 88   |
| <i>KIAA1586<sup>b</sup></i> | chr6:57019780-57064460   | 44,680    | AU1559301 | yes | Del | Maternal | 16   |
| <i>KIAA1586<sup>b</sup></i> | chr6:57019780-57064460   | 44,680    | 11933.p1  | yes | Dup | n/a      | 16   |

|                             |                          |           |           |     |     |          |      |
|-----------------------------|--------------------------|-----------|-----------|-----|-----|----------|------|
| <i>KIAA1586<sup>b</sup></i> | chr6:57019780-57064460   | 44,680    | 11425.p1  | yes | Dup | Paternal | 16   |
| <i>KIAA1586<sup>b</sup></i> | chr6:57019780-57064460   | 44,680    | 11468.p1  | yes | Dup | Paternal | 16   |
| <i>KIAA1586<sup>b</sup></i> | chr6:57019780-57064460   | 44,680    | 12106.p1  | yes | Dup | Paternal | 16   |
| <i>KIAA1586<sup>b</sup></i> | chr6:57019780-57064460   | 44,680    | 13415.p1  | yes | Del | Paternal | 16   |
| <i>KIAA1586<sup>b</sup></i> | chr6:57019780-57064460   | 44,680    | AU1187301 | yes | Dup | Paternal | 16   |
| <i>KIAA1586<sup>b</sup></i> | chr6:57019780-57064460   | 44,680    | 13865.p1  | yes | Del | Maternal | 16   |
| <i>KIAA1586<sup>b</sup></i> | chr6:57019780-57064460   | 44,680    | control   | yes | Del | n/a      | 16   |
| <i>MBD5</i>                 | chr2:148438643-148546784 | 108,141   | 13595.p1  | yes | Del | De novo  | 40   |
| <i>MBD5</i>                 | chr2:148538759-148686256 | 147,497   | 11917.p1  | yes | Dup | Maternal | 33   |
| <i>MBD5</i>                 | chr2:148566978-148768357 | 201,379   | 12390.p1  | yes | Del | Paternal | 45   |
| <i>MCC</i>                  | chr5:112383353-112468610 | 85,257    | 14013.p1  | yes | Del | Paternal | 53   |
| <i>MCC</i>                  | chr5:112486865-112516303 | 29,438    | 13833.p1  | yes | Del | Maternal | 22   |
| <i>MCPH1</i>                | chr8:6117093-6290589     | 173,496   | 12861.p1  | yes | Dup | Maternal | 147  |
| <i>MCPH1</i>                | chr8:6254308-6267453     | 13,145    | 13930.p1  | yes | Del | Maternal | 13   |
| <i>MCPH1</i>                | chr8:6274682-6277754     | 3,072     | 11818.p1  | yes | Del | Maternal | 6    |
| <i>MCPH1</i>                | chr8:6117093-6290589     | 173,496   | 13802.p1  | yes | Dup | Paternal | 147  |
| <i>MCPH1, DLGAP2</i>        | chr8:166252-6913476      | 6,747,224 | 13700.p1  | no  | Del | Maternal | 6259 |
| <i>MET</i>                  | chr7:114451937-116143324 | 1,691,387 | 12053.p1  | yes | Dup | Maternal | 483  |
| <i>MKL2</i>                 | chr16:13460682-14687836  | 1,227,154 | 13691.p1  | no  | Dup | Maternal | 520  |
| <i>MLL3</i>                 | chr7:151635262-151686760 | 51,498    | 12957.p1  | yes | Del | De novo  | 24   |
| <i>MLL5</i>                 | chr7:104379293-104510086 | 130,793   | 14255.p1  | yes | Dup | Maternal | 30   |
| <i>MPHOSPH8</i>             | chr13:19027522-19503622  | 476,100   | AU1744301 | no  | Dup | Maternal | 115  |
| <i>MPHOSPH8</i>             | chr13:18991146-19470342  | 479,196   | 14044.p1  | no  | Dup | Paternal | 117  |
| <i>MPHOSPH8</i>             | chr13:19133515-19223738  | 90,223    | 13784.p1  | yes | Dup | De novo  | 20   |
| <i>NLGN1</i>                | chr3:175418372-175993222 | 574,850   | 13697.p1  | yes | Dup | Maternal | 236  |
| <i>NRXN1</i>                | chr2:50645921-51105202   | 459,281   | 13962.p1  | yes | Del | De novo  | 198  |
| <i>NRXN1</i>                | chr2:51099065-51161671   | 62606     | 13580.p1  | yes | Del | De novo  | 16   |
| <i>NRXN1</i>                | chr2:50886326-51115410   | 229,084   | AU2681301 | yes | Del | Maternal | 88   |
| <i>NRXN1</i>                | chr2:50882413-51256102   | 373,689   | AU1495303 | yes | Del | Maternal | 135  |
| <i>NRXN1</i>                | chr2:50996153-51079874   | 83,721    | 12232.p1  | yes | Del | Maternal | 32   |
| <i>NRXN1</i>                | chr2:51001812-51105202   | 103,390   | 14443.p1  | yes | Del | Paternal | 42   |
| <i>NRXN1</i>                | chr2:51090304-51182095   | 91,791    | 13609.p1  | yes | Del | Paternal | 28   |
| <i>NRXN3</i>                | chr14:78505420-78574596  | 69,176    | 13367.p1  | yes | Del | Paternal | 21   |
| <i>NTRK3</i>                | chr15:86443548-86546448  | 102,900   | 11944.p1  | yes | Del | Paternal | 48   |
| <i>NXPPI</i>                | chr7:8751880-8791093     | 39,213    | 14240.p1  | yes | Del | Paternal | 40   |
| <i>PARK2</i>                | chr6:162641150-162832556 | 191,406   | 14091.p1  | yes | Dup | De novo  | 100  |

|              |                          |           |           |     |     |          |     |
|--------------|--------------------------|-----------|-----------|-----|-----|----------|-----|
| <i>PARK2</i> | chr6:162488727-162771149 | 282,422   | 12996.p1  | yes | Del | Maternal | 159 |
| <i>PARK2</i> | chr6:162641150-162832556 | 191,406   | 11577.p1  | yes | Dup | Maternal | 100 |
| <i>PARK2</i> | chr6:162304379-162481364 | 176,985   | 12937.p1  | yes | Del | Maternal | 73  |
| <i>PARK2</i> | chr6:162677927-162787382 | 109,455   | AU0039301 | yes | Del | Maternal | 55  |
| <i>PARK2</i> | chr6:162256999-162711888 | 454,889   | 12864.p1  | yes | Del | Paternal | 224 |
| <i>PARK2</i> | chr6:162623916-162979393 | 355,477   | AU079605  | yes | Dup | Paternal | 168 |
| <i>PARK2</i> | chr6:162168121-162496425 | 328,304   | 13151.p1  | yes | Dup | Paternal | 154 |
| <i>PARK2</i> | chr6:162692702-162951135 | 258,433   | 11947.p1  | yes | Dup | Paternal | 136 |
| <i>PARK2</i> | chr6:162374443-162614988 | 240,545   | AU1056301 | yes | Del | Paternal | 144 |
| <i>PARK2</i> | chr6:162598188-162762550 | 164,362   | AU1340302 | yes | Del | Paternal | 74  |
| <i>PARK2</i> | chr6:162781786-162841793 | 60,007    | AU0839301 | yes | Del | Paternal | 37  |
| <i>PARK2</i> | chr6:162605130-162661068 | 55,938    | AU011704  | yes | Del | Paternal | 24  |
| <i>PARK2</i> | chr6:162545343-162795400 | 250,057   | 12389.p1  | yes | Dup | Paternal | 116 |
| <i>PARK2</i> | chr6:162641150-162832556 | 191,406   | 13115.p1  | yes | Dup | Paternal | 100 |
| <i>PARK2</i> | chr6:162641150-162832556 | 191,406   | 13874.p1  | yes | Dup | Maternal | 100 |
| <i>PARK2</i> | chr6:162641150-162832556 | 191,406   | 14268.p1  | yes | Dup | Paternal | 100 |
| <i>PARK2</i> | chr6:162291421-162414184 | 122,763   | 13407.p1  | yes | Del | Paternal | 50  |
| <i>PARK2</i> | chr6:162248070-162366075 | 118,005   | 13058.p1  | yes | Dup | Paternal | 43  |
| <i>PARK2</i> | chr6:162556092-162657434 | 101,342   | 14153.p1  | yes | Del | Paternal | 38  |
| <i>PARK2</i> | chr6:162734379-162816234 | 81,855    | 11236.p1  | yes | Dup | Maternal | 51  |
| <i>PARK2</i> | chr6:162978993-163060311 | 81,318    | 14056.p1  | yes | Del | Maternal | 14  |
| <i>PARK2</i> | chr6:162568520-162614988 | 46,468    | 13559.p1  | yes | Dup | Paternal | 18  |
| <i>PARK2</i> | chr6:162545343-162568920 | 23,577    | 14234.p1  | yes | Del | Maternal | 10  |
| <i>PARK2</i> | chr6:162641150-162832556 | 191,406   | control   | yes | Dup | n/a      | 100 |
| <i>PARK2</i> | chr6:162641150-162826779 | 185,629   | control   | yes | Dup | n/a      | 98  |
| <i>PARK2</i> | chr6:162677927-162787382 | 109,455   | control   | yes | Del | n/a      | 55  |
| <i>PCDH9</i> | chr13:66380470-66595448  | 214,978   | 13708.p1  | yes | Dup | Paternal | 75  |
| <i>PDE4A</i> | chr19:10437100-10447425  | 10,325    | 14075.p1  | yes | Dup | Maternal | 3   |
| <i>PLCBI</i> | chr20:8043384-8523661    | 480,277   | 13817.p1  | yes | Del | Maternal | 265 |
| <i>PLCBI</i> | chr20:8043384-8523661    | 480,277   | 14249.p1  | yes | Del | Maternal | 265 |
| <i>PLCBI</i> | chr20:8043384-8523661    | 480,277   | AU2689306 | yes | Dup | Maternal | 265 |
| <i>PLCBI</i> | chr20:7514079-8271234    | 757,155   | 11013.p1  | yes | Dup | Maternal | 358 |
| <i>PLCBI</i> | chr20:8043384-8523661    | 480,277   | AU1887301 | yes | Dup | Paternal | 265 |
| <i>PLCBI</i> | chr20:7065537-8523661    | 1,458,124 | 13085.p1  | yes | Dup | Paternal | 696 |
| <i>POGZ</i>  | chr1:149599548-149673824 | 74,276    | 12691.p1  | yes | Dup | Maternal | 39  |
| <i>RGS7</i>  | chr1:239564337-239904109 | 339,772   | 14240.p1  | yes | Dup | Maternal | 173 |

|                |                          |           |           |     |     |          |      |
|----------------|--------------------------|-----------|-----------|-----|-----|----------|------|
| <i>ROBO1</i>   | chr3:77925115-84485593   | 6,560,478 | 13877.p1  | no  | Del | De novo  | 1736 |
| <i>ROBO1</i>   | chr3:78300538-78990968   | 690,430   | 13094.p1  | yes | Dup | Paternal | 226  |
| <i>RSRC1</i>   | chr3:159632251-160281110 | 648,859   | 12215.p1  | yes | Dup | Paternal | 249  |
| <i>SEMA5A</i>  | chr5:9152479-9300739     | 148,260   | 13642.p1  | yes | Del | De novo  | 89   |
| <i>SLCIA1</i>  | chr9:4313244-5015973     | 702,730   | 14363.p1  | yes | Dup | Maternal | 504  |
| <i>SLCIA1</i>  | chr9:4461017-4735859     | 274,843   | 13572.p1  | yes | Dup | Paternal | 226  |
| <i>TBC1D4</i>  | chr13:74826997-74918087  | 91,090    | AU1565302 | yes | Del | Paternal | 39   |
| <i>THSD7A</i>  | chr7:11167884-12440226   | 1,272,342 | 11398.p1  | yes | Dup | Paternal | 780  |
| <i>ZMYND11</i> | chr10:109596-245317      | 135,721   | 12843.p1  | yes | Dup | De novo  | 41   |
| <i>ZMYND11</i> | chr10:109596-245317      | 135,721   | 12956.p1  | yes | Dup | Paternal | 41   |

<sup>a</sup>Inheritance information could not be assessed in controls as well a subset of autistic probands in which parental DNA samples were unavailable or the CNV call was unclear. <sup>b</sup>Hotspot-mediated or -associated CNV.

**Table S12. List of CNVs identified in the genomic backbone (non-hotspot regions)**

| SSC ID   | Chr   | Start (kbp) | Stop (kbp) | Size (kbp) | #Probes | Score | Gene Names                                                                                                                                                                                                                                                                                                                                                                                                                                                                                                                    |
|----------|-------|-------------|------------|------------|---------|-------|-------------------------------------------------------------------------------------------------------------------------------------------------------------------------------------------------------------------------------------------------------------------------------------------------------------------------------------------------------------------------------------------------------------------------------------------------------------------------------------------------------------------------------|
| 11000.p1 | chr1  | 920.5       | 923.5      | 3          | 49      | Dup   | <i>TGFBR3, BRDT, EPHX4, BTBD8</i>                                                                                                                                                                                                                                                                                                                                                                                                                                                                                             |
| 11008.p1 | chr18 | 3.6         | 6.5        | 2.9        | 41      | Dup   | <i>COLEC12, CETN1, CLUL1, C18orf56, TYMS</i>                                                                                                                                                                                                                                                                                                                                                                                                                                                                                  |
| 11014.p1 | chr4  | 570.5       | 573.1      | 2.55       | 21      | Dup   | <i>SRP72, ARL9, HOPX</i>                                                                                                                                                                                                                                                                                                                                                                                                                                                                                                      |
| 11026.p1 | chr7  | 1215.1      | 1219.4     | 4.29       | 74      | Dup   | <i>AASS, FEZF1, CADPS2</i>                                                                                                                                                                                                                                                                                                                                                                                                                                                                                                    |
| 11033.p1 | chr2  | 1158.1      | 1167       | 8.92       | 137     | Dup   | <i>DPP10</i>                                                                                                                                                                                                                                                                                                                                                                                                                                                                                                                  |
| 11046.p1 | chr3  | 41.4        | 48.4       | 7.08       | 75      | Del   | <i>SETMAR, SUMF1, ITPR1, EGO</i>                                                                                                                                                                                                                                                                                                                                                                                                                                                                                              |
| 11047.p1 | chr14 | 937.1       | 945.8      | 8.76       | 59      | Dup   | <i>PPP4R4, SERPINA10, SERPINA6, SERPINA1, SERPINA9, SERPINA12, SERPINA4, SERPINA5, SERPINA3, SERPINA13, GSC</i>                                                                                                                                                                                                                                                                                                                                                                                                               |
| 11064.p1 | chr2  | 336         | 343.5      | 7.53       | 60      | Dup   | <i>RASGRP3, FAM98A, MYADML</i>                                                                                                                                                                                                                                                                                                                                                                                                                                                                                                |
| 11141.p1 | chr1  | 2264        | 2268       | 3.99       | 66      | Dup   | <i>GUK1, GJC2, C1orf69, OBSCN, TRIM11, TRIM17, HIST3H3, HIST3H2A, HIST3H2BB, RNF187</i>                                                                                                                                                                                                                                                                                                                                                                                                                                       |
| 11141.p1 | chr2  | 2406.2      | 2425.7     | 19.52      | 402     | Dup   | <i>OR6B2, LOC643905, OR6B3, MYEOV2, OTOS, GPC1, PP14571, ANKMY1, DUSP28, RNPEPL1, CAPN10, GPR35, AQP12B, AQP12A, KIF1A, AGXT, C2orf54, SNED1, MTERFD2, PASK, PPP1R7, ANO7, HDLBP, SEPT2, FARP2, STK25, BOK, THAP4, ATG4B, DTYMK, ING5, D2HGDH, GAL3ST2, NEU4, PDCD1, C2orf85</i>                                                                                                                                                                                                                                              |
| 11141.p1 | chr8  | 134         | 147.1      | 13.01      | 108     | Dup   | <i>DLC1, C8orf48, SGCZ</i>                                                                                                                                                                                                                                                                                                                                                                                                                                                                                                    |
| 11141.p1 | chr8  | 433.3       | 476.6      | 43.24      | 98      | Dup   | <i>POTEA</i>                                                                                                                                                                                                                                                                                                                                                                                                                                                                                                                  |
| 11141.p1 | chr8  | 1438.2      | 1456.7     | 18.41      | 286     | Dup   | <i>LYPD2, LYNX1, LY6D, GML, CYP11B1, CYP11B2, LOC100133669, LY6E, C8orf31, LY6H, GPIHBP1, ZFP41, GLI4, ZNF696, TOP1MT, C8orf51, RHPN1, MAFA, ZC3H3, GSDMD, C8orf73, NAPRT1, EEF1D, TIGD5, PYCRL, TSTA3, ZNF623, ZNF707, BREA2, MAPK15, FAM83H, SCRIB, PUF60, NRBP2, EPPK1, PLEC1, PARP10, GRINA, SPATC1, OPLAH, EXOSC4, GPA1, CYC1, SHARPIN, MAF1, KIAA1875, C8orf30A, HEATR7A, SCXB, SCXA, C8orf30A, BOPI, SCXB, SCXA, HSF1, DGAT1, SCRT1, C8ORFK29, FBXL6, GPR172A, ADCK5, CPSF1, SLC39A4, VPS28, NFKBIL2, CYHR1, KIFC2</i> |
| 11161.p1 | chr1  | 2454.6      | 2467.9     | 13.3       | 206     | Del   | <i>LOC441931, VNIR5, ZNF496, NLRP3, OR2B11, OR2W5, LOC148824, OR2C3, C1orf150, OR2G2, OR2G3, OR13G1, OR6F1, OR1C1, OR14A16, OR11L1, TRIM58, OR2W3, OR2T8, OR2L13, OR2L8, OR2AK2, OR2L1P, OR2L2, OR2L3, OR2M1P, OR2M5, OR2M2, OR2M3, OR2M4, OR2T33, OR2T12, OR2M7, OR14C36, OR2T4, OR2T6, OR2T1, OR2T2, OR2T3, OR2T5, OR2G6</i>                                                                                                                                                                                                |
| 11181.p1 | chr14 | 882.4       | 885.3      | 2.94       | 22      | Dup   | <i>EML5, TTC8</i>                                                                                                                                                                                                                                                                                                                                                                                                                                                                                                             |
| 11190.p1 | chr4  | 1087.2      | 1090.9     | 3.75       | 29      | Dup   | <i>PAPSS1, SGMS2, CYP2U1</i>                                                                                                                                                                                                                                                                                                                                                                                                                                                                                                  |



|          |       |        |        |       |       |     |                                                                                                                                                                                                                                                                                                                                                                 |
|----------|-------|--------|--------|-------|-------|-----|-----------------------------------------------------------------------------------------------------------------------------------------------------------------------------------------------------------------------------------------------------------------------------------------------------------------------------------------------------------------|
| 11198.p1 | chr8  | 133.9  | 136.5  | 2.61  | 21    | Dup | <i>DLCL1, C8orf48</i>                                                                                                                                                                                                                                                                                                                                           |
| 11219.p1 | chr4  | 28.8   | 31.6   | 2.79  | 53    | Dup | <i>ADD1, MFSD10, C4orf10, NOP14, GRK4, HTT</i>                                                                                                                                                                                                                                                                                                                  |
| 11225.p1 | chr8  | 39.9   | 43.5   | 3.59  | 175   | Del | <i>CSMD1</i>                                                                                                                                                                                                                                                                                                                                                    |
| 11233.p1 | chr15 | 668.9  | 719.4  | 50.48 | 2,102 | Del | <i>ANP32A, NOX5, SPESP1, TMEM84, GLCE, PAQR5KIF23, RPLP1, LOC145837, C15orf50, TLE3, UACA, LARP6, THAP10, LRRC49, LOC196993, THSD4, NR2E3, MYO9A, SENP8, GRAMD2, PKM2, PARP6, BRUNOL6, HEXA, C15orf34, TMEM202, ARIH1, GOLGA6B, HIGD2B, BBS4, ADPGK, NEO1, HCN4, C15orf60, NPTN, CD276, C15orf59</i>                                                            |
| 11242.p1 | chr14 | 211.9  | 214.8  | 2.94  | 29    | Dup | <i>OR4E2</i>                                                                                                                                                                                                                                                                                                                                                    |
| 11299.p1 | chr6  | 1187.1 | 1192.3 | 5.16  | 68    | Dup | <i>SLC35F1, C6orf204, BRD7P3, PLN</i>                                                                                                                                                                                                                                                                                                                           |
| 11301.p1 | chr1  | 2434.5 | 2438   | 3.48  | 27    | Del | <i>KIF26B</i>                                                                                                                                                                                                                                                                                                                                                   |
| 11353.p1 | chr17 | 318.4  | 333.5  | 15.18 | 2,570 | Del | <i>TBC1D3C, TBC1D3G, ZNHIT3, MYO19, PIGW, GGNBP2, DHRS11, MRM1, LHX1, AATF, ACACA, C17orf78, TADA2L, DUSP14, AP1GBP1, DDX52, HNF1B, LOC284100</i>                                                                                                                                                                                                               |
| 11415.p1 | chr3  | 112.1  | 114.9  | 2.74  | 58    | Dup | <i>HRH1, ATG7</i>                                                                                                                                                                                                                                                                                                                                               |
| 11444.p1 | chr17 | 99.2   | 103.6  | 4.32  | 114   | Dup | <i>GAS7, MYH13, MYH8, MYH4, MYH1</i>                                                                                                                                                                                                                                                                                                                            |
| 11464.p1 | chr3  | 650.9  | 653.7  | 2.76  | 28    | Dup | <i>MAG11</i>                                                                                                                                                                                                                                                                                                                                                    |
| 11469.p1 | chr1  | 1737   | 1740.3 | 3.28  | 48    | Dup | <i>TNR</i>                                                                                                                                                                                                                                                                                                                                                      |
| 11480.p1 | chr6  | 260.8  | 263.9  | 3.1   | 25    | Dup | <i>TRIM38, HIST1H1A, HIST1H3A, HIST1H4A, HIST1H4B, HIST1H3B, HIST1H2AB, HIST1H2BB, HIST1H3C, HIST1H1C, HFE, HIST1H4C, HIST1H1T, HIST1H2BC, HIST1H2AC, HIST1H1E, HIST1H2BD, HIST1H2BD, HIST1H2BE, HIST1H4D, HIST1H3D, HIST1H2AD, HIST1H2BF, HIST1H4E, HIST1H2BG, HIST1H2AE, HIST1H3E, HIST1H1D, HIST1H4F, HIST1H4G, HIST1H3F, HIST1H2BH, HIST1H3G, HIST1H2BI</i> |
| 11483.p1 | chr12 | 1233.4 | 1236.7 | 3.31  | 80    | Dup | <i>FAM101A, NCOR2</i>                                                                                                                                                                                                                                                                                                                                           |
| 11483.p1 | chr22 | 363.4  | 367    | 3.63  | 52    | Dup | <i>GGA1, SH3BP1, PDXP, LGALS1, NOL12, TRIOBP, HIF0, GCAT, GALR3, ANKRD54, EIF3L, MICALL1, C22orf23, POLR2F, SOX10</i>                                                                                                                                                                                                                                           |
| 11483.p1 | chr4  | 234.7  | 237.3  | 2.54  | 20    | Dup | <i>PPARGC1A</i>                                                                                                                                                                                                                                                                                                                                                 |
| 11483.p1 | chr5  | 1389.9 | 1392.7 | 2.75  | 28    | Dup | <i>CXXC5, PSD2, NRG2</i>                                                                                                                                                                                                                                                                                                                                        |
| 11496.p1 | chr14 | 651.2  | 654.7  | 3.59  | 24    | Dup | <i>FUT8</i>                                                                                                                                                                                                                                                                                                                                                     |
| 11519.p1 | chr10 | 1218.1 | 1224.8 | 6.72  | 51    | Del | <i>PPAPDC1A</i>                                                                                                                                                                                                                                                                                                                                                 |
| 11519.p1 | chr6  | 1689.9 | 1695.4 | 5.45  | 51    | Dup | <i>THBS2</i>                                                                                                                                                                                                                                                                                                                                                    |
| 11532.p1 | chr17 | 60.4   | 72.6   | 12.2  | 137   | Dup | <i>AIPL1, FAM64A, PITPNM3, KIAA0753, TXNDC17, MED31, C17orf100, SLC13A5, XAF1, FBXO39, TEK1, ALOX12P2, ALOX12, RNASEK, C17orf49,</i>                                                                                                                                                                                                                            |

|          |       |        |        |       |       |     |                                                                                                                                                                                                                                                                                                                                                                                                                                                                                                                                                                                                                                                                                                                                                                                             |
|----------|-------|--------|--------|-------|-------|-----|---------------------------------------------------------------------------------------------------------------------------------------------------------------------------------------------------------------------------------------------------------------------------------------------------------------------------------------------------------------------------------------------------------------------------------------------------------------------------------------------------------------------------------------------------------------------------------------------------------------------------------------------------------------------------------------------------------------------------------------------------------------------------------------------|
|          |       |        |        |       |       |     | <i>BCL6B, SLC16A13, SLC16A11, CLEC10A, ASGR2, ASGR1, DLG4, ACADVL, DVL2, PHF23, GABARAP, DULLARD, C17orf81, CLDN7, SLC2A4, YBX2, EIF5A, GPS2, NEURL4, ACAP1, KCTD11, TMEM95, TNK1, PLSCR3, C17orf61, NLGN2</i>                                                                                                                                                                                                                                                                                                                                                                                                                                                                                                                                                                              |
| 11542.p1 | chr11 | 1070.5 | 1073.5 | 3.04  | 58    | Dup | <i>SLN, SLC35F2, RAB39</i>                                                                                                                                                                                                                                                                                                                                                                                                                                                                                                                                                                                                                                                                                                                                                                  |
| 11544.p1 | chr6  | 1689.9 | 1695.4 | 5.45  | 51    | Dup | <i>THBS2</i>                                                                                                                                                                                                                                                                                                                                                                                                                                                                                                                                                                                                                                                                                                                                                                                |
| 11581.p1 | chr16 | 752.1  | 763.2  | 11.07 | 118   | Dup | <i>MON1B, LOC100130958, ADAMTS18, NUDT7</i>                                                                                                                                                                                                                                                                                                                                                                                                                                                                                                                                                                                                                                                                                                                                                 |
| 11651.p1 | chr21 | 434.7  | 437.5  | 2.75  | 12    | Dup | <i>SIK1, C21orf125, C21orf84</i>                                                                                                                                                                                                                                                                                                                                                                                                                                                                                                                                                                                                                                                                                                                                                            |
| 11651.p1 | chr9  | 1047.5 | 1050.3 | 2.82  | 30    | Dup | <i>CYLC2</i>                                                                                                                                                                                                                                                                                                                                                                                                                                                                                                                                                                                                                                                                                                                                                                                |
| 11689.p1 | chr10 | 9      | 13.8   | 4.76  | 58    | Dup | <i>LARP5, GTPBP4, IDI2, C10orf110, IDI1, WDR37, C10orf139, ADARB2</i>                                                                                                                                                                                                                                                                                                                                                                                                                                                                                                                                                                                                                                                                                                                       |
| 11756.p1 | chr6  | 577.7  | 621.8  | 44.05 | 62    | Dup | <i>GUSBL2</i>                                                                                                                                                                                                                                                                                                                                                                                                                                                                                                                                                                                                                                                                                                                                                                               |
| 11756.p1 | chr6  | 1003.9 | 1007.5 | 3.64  | 29    | Dup | <i>MCHR2</i>                                                                                                                                                                                                                                                                                                                                                                                                                                                                                                                                                                                                                                                                                                                                                                                |
| 11843.p1 | chr7  | 1535.9 | 1542.5 | 6.6   | 51    | Del | <i>DPP6</i>                                                                                                                                                                                                                                                                                                                                                                                                                                                                                                                                                                                                                                                                                                                                                                                 |
| 11851.p1 | chr3  | 5.5    | 14.3   | 8.84  | 75    | Dup | <i>CNTN6</i>                                                                                                                                                                                                                                                                                                                                                                                                                                                                                                                                                                                                                                                                                                                                                                                |
| 11878.p1 | chr3  | 605.1  | 608    | 2.86  | 21    | Del | <i>FHIT</i>                                                                                                                                                                                                                                                                                                                                                                                                                                                                                                                                                                                                                                                                                                                                                                                 |
| 11905.p1 | chr3  | 124.5  | 128.3  | 3.76  | 57    | Dup | <i>TSEN2, MKRN2, RAF1, TMEM40, CAND2</i>                                                                                                                                                                                                                                                                                                                                                                                                                                                                                                                                                                                                                                                                                                                                                    |
| 11944.p1 | chr17 | 153.8  | 165.3  | 11.49 | 131   | Dup | <i>FAM18B2, CDRT1, TRIM16, ZNF286A, TBC1D26, MEIS3P1, ADORA2B, ZSWIM7, TTC19, NCOR1, PIGL, CENPV, UBB, TRPV2, C17orf45, SNORD49B, SNORD49A, SNORD65, C17orf76, ZNF287, ZNF624</i>                                                                                                                                                                                                                                                                                                                                                                                                                                                                                                                                                                                                           |
| 11962.p1 | chr10 | 527    | 544.2  | 17.23 | 252   | Dup | <i>PRKG1, CSTF2T, DKK1, MBL2</i>                                                                                                                                                                                                                                                                                                                                                                                                                                                                                                                                                                                                                                                                                                                                                            |
| 11986.p1 | chr20 | 126.9  | 132.8  | 5.89  | 46    | Del | <i>SPTLC3, ISM1</i>                                                                                                                                                                                                                                                                                                                                                                                                                                                                                                                                                                                                                                                                                                                                                                         |
| 11989.p1 | chr5  | 151.6  | 159.2  | 7.63  | 61    | Dup | <i>FBXL7</i>                                                                                                                                                                                                                                                                                                                                                                                                                                                                                                                                                                                                                                                                                                                                                                                |
| 11999.p1 | chr3  | 5.5    | 14.3   | 8.84  | 75    | Dup | <i>CNTN6</i>                                                                                                                                                                                                                                                                                                                                                                                                                                                                                                                                                                                                                                                                                                                                                                                |
| 12007.p1 | chr15 | 184.3  | 267.5  | 83.13 | 3,479 | Dup | <i>LOC727832, GOLGA8C, LOC646214, CXADRP2, POTE8, LOC727924, OR4M2, OR4N4, LOC650137, GOLGA8D, LOC283767, TUBGCP5, CYFIP1, NIPA2, NIPA1, WHAMML1, GOLGA9P, HERC2P2, GOLGA8E, MKRN3, MAGEL2, NDN, PWRN2, PWRN1, C15orf2, SNRPN, SNURF, SNORD107, PAR-SN, PAR5, SNORD64, SNORD108, SNORD109A, SNORD109B, SNORD116-1, SNORD116-2, SNORD116-9, SNORD116-3, SNORD116-4, SNORD116-5, SNORD116-6, SNORD116-2, SNORD116-7, SNORD116-5, SNORD116-8, SNORD116-10, SNORD116-11, SNORD116-12, SNORD116-13, SNORD116-14, SNORD116-15, SNORD116-16, SNORD116-19, SNORD116-17, SNORD116-18, SNORD116-19, SNORD116-17, SNORD116-20, SNORD116-21, SNORD116-22, SNORD116-23, SNORD116-24, SNORD116-25, SNORD116-26, SNORD116-27, SNORD116-28, SNORD116-29, IPW, PARI, SNORD115-1, SNORD115-2, SNORD115-3,</i> |

|          |       |        |        |       |     |     |                                                                                                                                                                                                                                                                                                                                                                                                                                                                                                                                                                                                                                                                                                                                                                                                                                                                                                                                                                                                                                        |
|----------|-------|--------|--------|-------|-----|-----|----------------------------------------------------------------------------------------------------------------------------------------------------------------------------------------------------------------------------------------------------------------------------------------------------------------------------------------------------------------------------------------------------------------------------------------------------------------------------------------------------------------------------------------------------------------------------------------------------------------------------------------------------------------------------------------------------------------------------------------------------------------------------------------------------------------------------------------------------------------------------------------------------------------------------------------------------------------------------------------------------------------------------------------|
|          |       |        |        |       |     |     | <i>SNORD115-4, SNORD115-5, SNORD115-12, SNORD115-10, SNORD115-9, SNORD115-6, SNORD115-7, SNORD115-8, SNORD115-12, SNORD115-10, SNORD115-9, SNORD115-5, SNORD115-10, SNORD115-11, SNORD115-29, SNORD115-36, SNORD115-43, SNORD115-12, SNORD115-10, SNORD115-9, SNORD115-5, SNORD115-13, SNORD115-14, SNORD115-15, SNORD115-16, SNORD115-19, SNORD115-18, SNORD115-17, SNORD115-19, SNORD115-18, SNORD115-17, SNORD115-19, SNORD115-18, SNORD115-17, SNORD115-21, SNORD115-20, SNORD115-22, PAR4, SNORD115-23, HBII-52-24, SNORD115-25, SNORD115-26, HBII-52-27, HBII-52-28, SNORD115-11, SNORD115-29, SNORD115-36, SNORD115-30, SNORD115-31, SNORD115-32, SNORD115-33, SNORD115-34, SNORD115-35, SNORD115-11, SNORD115-29, SNORD115-37, SNORD115-38, SNORD115-39, SNORD115-40, SNORD115-41, SNORD115-42, SNORD115-10, SNORD115-15, SNORD115-11, SNORD115-36, SNORD115-29, SNORD115-43, SNORD115-44, HBII-52-45, HBII-52-46, SNORD115-48, SNORD109A, SNORD109B, UBE3A, ATP10A, GABRB3, GABRA5, GABRG3, OCA2, HERC2, GOLGA8F, GOLGA8G</i> |
| 12032.p1 | chr3  | 672.3  | 723.2  | 50.98 | 587 | Del | <i>SUCLG2, FAM19A1, FAM19A4, C3orf64, TMF1, UBA3, ARL6IP5, LMOD3, FRMD4B, MITF, FOXP1, EIF4E3, GPR27, PROK2</i>                                                                                                                                                                                                                                                                                                                                                                                                                                                                                                                                                                                                                                                                                                                                                                                                                                                                                                                        |
| 12033.p1 | chr4  | 1659.2 | 1663.6 | 4.41  | 34  | Dup | <i>TRIM61, C4orf39, TRIM60, TRIM75, TMEM192, KLHL2</i>                                                                                                                                                                                                                                                                                                                                                                                                                                                                                                                                                                                                                                                                                                                                                                                                                                                                                                                                                                                 |
| 12066.p1 | chr11 | 218.1  | 267.2  | 49.1  | 387 | Dup | <i>ANO5, SLC17A6, FANCF, GAS2, SVIP, LUZP2, ANO3, MUC15, SLC5A12</i>                                                                                                                                                                                                                                                                                                                                                                                                                                                                                                                                                                                                                                                                                                                                                                                                                                                                                                                                                                   |
| 12118.p1 | chr10 | 1334.3 | 1343.4 | 9.12  | 56  | Dup | <i>PPP2R2D, BNIP3, JAKMIP3, DPYSL4, STK32C, LRRC27, PWWP2B, C10orf91, INPP5A</i>                                                                                                                                                                                                                                                                                                                                                                                                                                                                                                                                                                                                                                                                                                                                                                                                                                                                                                                                                       |
| 12132.p1 | chr14 | 435.7  | 441.3  | 5.57  | 42  | Dup | <i>FSCB</i>                                                                                                                                                                                                                                                                                                                                                                                                                                                                                                                                                                                                                                                                                                                                                                                                                                                                                                                                                                                                                            |
| 12144.p1 | chr7  | 1580.9 | 1584.2 | 3.35  | 35  | Dup | <i>NCAPG2, FAM62B, WDR60</i>                                                                                                                                                                                                                                                                                                                                                                                                                                                                                                                                                                                                                                                                                                                                                                                                                                                                                                                                                                                                           |
| 12185.p1 | chr7  | 1521.7 | 1532.9 | 11.18 | 231 | Dup | <i>ACTR3B, DPP6</i>                                                                                                                                                                                                                                                                                                                                                                                                                                                                                                                                                                                                                                                                                                                                                                                                                                                                                                                                                                                                                    |
| 12215.p1 | chr3  | 1596.3 | 1602.8 | 6.49  | 48  | Dup | <i>RSRC1, MLF1, GFMI1, LXN, RARRES1, MFSD1, IQCJ</i>                                                                                                                                                                                                                                                                                                                                                                                                                                                                                                                                                                                                                                                                                                                                                                                                                                                                                                                                                                                   |
| 12224.p1 | chr19 | 204    | 207.8  | 3.77  | 19  | Dup | <i>ZNF826, ZNF737, ZNF626</i>                                                                                                                                                                                                                                                                                                                                                                                                                                                                                                                                                                                                                                                                                                                                                                                                                                                                                                                                                                                                          |
| 12224.p1 | chr22 | 387.8  | 391    | 3.17  | 46  | Del | <i>TNRC6B, ADSL, SGSM3</i>                                                                                                                                                                                                                                                                                                                                                                                                                                                                                                                                                                                                                                                                                                                                                                                                                                                                                                                                                                                                             |
| 12232.p1 | chr21 | 450.6  | 455.6  | 5.01  | 114 | Dup | <i>PTTG1IP, ITGB2, C21orf67, C21orf70, NCRNA00162, C21orf122, ADARBI, POFUT2, LOC642852</i>                                                                                                                                                                                                                                                                                                                                                                                                                                                                                                                                                                                                                                                                                                                                                                                                                                                                                                                                            |
| 12235.p1 | chr9  | 1299.2 | 1305.2 | 5.97  | 98  | Dup | <i>PTGES2, LOC389791, LCN2, C9orf16, CIZ1, DNMI1, GOLGA2, C9orf119, TRUB2, COQ4, SLC27A4, URM1, CERCAM, ODF2, GLE1, SPTAN1, WDR34, SET, PKN3</i>                                                                                                                                                                                                                                                                                                                                                                                                                                                                                                                                                                                                                                                                                                                                                                                                                                                                                       |
| 12239.p1 | chr22 | 174.1  | 180.6  | 6.49  | 945 | Del | <i>DGCR2, DGCR11, DGCR14, TSSK2, GSC2, SLC25A1, CLTCL1, HIRA, MRPL40, C22orf39, UFD1L, CDC45L, CLDN5, LOC150185</i>                                                                                                                                                                                                                                                                                                                                                                                                                                                                                                                                                                                                                                                                                                                                                                                                                                                                                                                    |
| 12242.p1 | chr17 | 289.9  | 299.9  | 9.99  | 62  | Dup | <i>ACCN1, CCL2, CCL7, CCL11, CCL8, CCL13, CCL1, C17orf102, TMEM132E</i>                                                                                                                                                                                                                                                                                                                                                                                                                                                                                                                                                                                                                                                                                                                                                                                                                                                                                                                                                                |

|          |       |        |        |       |       |     |                                                                                                                                                                                                                                                                   |
|----------|-------|--------|--------|-------|-------|-----|-------------------------------------------------------------------------------------------------------------------------------------------------------------------------------------------------------------------------------------------------------------------|
| 12279.p1 | chr3  | 600.6  | 603.9  | 3.23  | 24    | Del | <i>FHIT</i>                                                                                                                                                                                                                                                       |
| 12296.p1 | chr6  | 577.7  | 622.5  | 44.83 | 63    | Dup | <i>GUSBL2</i>                                                                                                                                                                                                                                                     |
| 12316.p1 | chr9  | 6.2    | 10.5   | 4.31  | 88    | Dup | <i>KANK1, DMRT1, DMRT3, DMRT2</i>                                                                                                                                                                                                                                 |
| 12323.p1 | chr12 | 1315.6 | 1318.3 | 2.74  | 19    | Dup | <i>FBRSL1, P2RX2, POLE, PXMP2, PGAM5, ANKLE2</i>                                                                                                                                                                                                                  |
| 12334.p1 | chr6  | 1188   | 1191.8 | 3.75  | 58    | Dup | <i>C6orf204, BRD7P3, PLN</i>                                                                                                                                                                                                                                      |
| 12341.p1 | chr17 | 587.3  | 596.7  | 9.41  | 95    | Dup | <i>TANC2, CYB561, CYB561, CYB561, ACE, ACE, KCNH6, KCNH6, WDR68, CCDC44, MAP3K3, LIMD2, STRADA, CCDC47, DDX42, FTSJ3, PSMC5, SMARCD2, TCAM1, CSH2, CSH2, GH2, GH2, GH2, CSH1, CSHL1, GH1, CD79B, SCN4A, C17orf72, ICAM2, ICAM2, ERN1, SNORD104, SNORA76, TEX2</i> |
| 12376.p1 | chr5  | 3.7    | 10     | 6.32  | 189   | Dup | <i>AHRR, C5orf55, EXOC3, LOC25845, SLC9A3, CEP72, TPPP, ZDHHC11, BRD9, TRIP13</i>                                                                                                                                                                                 |
| 12434.p1 | chr13 | 1137.7 | 1141.2 | 3.49  | 63    | Dup | <i>RASA3, CDC16, UPF3A, ZNF828</i>                                                                                                                                                                                                                                |
| 12465.p1 | chr6  | 10.2   | 15.6   | 5.39  | 52    | Dup | <i>LOC285768, FOXQ1, FOXF2, FOXC1</i>                                                                                                                                                                                                                             |
| 12594.p1 | chr7  | 722.6  | 738.6  | 15.99 | 511   | Dup | <i>NCF1B, GTF2IRD2P, NSUN5, TRIM50, FKBP6, FZD9, BAZ1B, BCL7B, TBL2, MLXIPL, VPS37D, DNAJC30, WBSCR22, STX1A, WBSCR26, ABHD11, CLDN3, CLDN4, WBSCR27, WBSCR28, ELN, LIMK1, EIF4H, LAT2, RFC2, CLIP2, GTF2IRD1, GTF2I, NCF1, GTF2IRD2</i>                          |
| 12604.p1 | chr10 | 160.2  | 166.2  | 5.92  | 42    | Del | <i>PTER, C1QL3</i>                                                                                                                                                                                                                                                |
| 12604.p1 | chr7  | 1429.2 | 1434.8 | 5.62  | 77    | Dup | <i>LOC441294, FAM115C, CTAGE6, LOC154761, FAM115A, OR2F2, OR2F1, OR6B1, OR2A5, OR2A25, OR2A12, OR2A2, OR2A14</i>                                                                                                                                                  |
| 12689.p1 | chr5  | 970.8  | 982.7  | 11.97 | 91    | Dup | <i>RGMB, CHD1</i>                                                                                                                                                                                                                                                 |
| 12691.p1 | chr16 | 688.4  | 715    | 26.52 | 678   | Del | <i>AARS, DDX19B, DDX19A, ST3GAL2, FUK, COG4, SF3B3, SNORD111B, SNORD111, IL34, MTSS1L, VAC14, HYDIN, FTSJD1, CALB2, ZNF23, ZNF19, CHST4, TAT, MARVELD3, PHLPL, AP1G1, SNORD71, ATXN1L, ZNF821, KIAA0174, PKD1L3, DHODH, HP, HPR, TXNL4B, DHX38, PMFBP1, ZFH3</i>  |
| 12729.p1 | chr2  | 452.7  | 458.2  | 5.56  | 133   | Dup | <i>SRBD1, PRKCE</i>                                                                                                                                                                                                                                               |
| 12735.p1 | chr2  | 1032.6 | 1087   | 54.38 | 1,229 | Del | <i>LOC150568, POU3F3, MRPS9, GPR45, TGFBRAPI, C2orf49, FHL2, NCK2, C2orf40, UXS1, PLGLA, RGPLD3, ST6GAL2, LOC729121, RGPLD4, SLC5A7, SULT1C3, SULT1C2, SULT1C4, GCC2, LIMS1</i>                                                                                   |
| 12750.p1 | chr4  | 1519   | 1522.1 | 3.1   | 51    | Del | <i>LRBA</i>                                                                                                                                                                                                                                                       |
| 12763.p1 | chr12 | 737    | 743.9  | 6.92  | 54    | Dup | <i>KCNC2, CAPS2, GLIPR1L1, GLIPR1L2, GLIPR1, KRR1</i>                                                                                                                                                                                                             |
| 12766.p1 | chr10 | 61.1   | 65     | 3.95  | 66    | Dup | <i>IL2RA, RBM17, PFKFB3</i>                                                                                                                                                                                                                                       |
| 12775.p1 | chr8  | 45.9   | 59.2   | 13.36 | 139   | Del | <i>CSMD1</i>                                                                                                                                                                                                                                                      |
| 12831.p1 | chr7  | 699.4  | 702.4  | 2.98  | 61    | Dup | <i>WBSCR17</i>                                                                                                                                                                                                                                                    |

|          |       |        |        |       |       |     |                                                                                                                                                                                                                                                                                                                                                              |
|----------|-------|--------|--------|-------|-------|-----|--------------------------------------------------------------------------------------------------------------------------------------------------------------------------------------------------------------------------------------------------------------------------------------------------------------------------------------------------------------|
| 12860.p1 | chr6  | 20     | 22.7   | 2.64  | 19    | Dup | <i>GMDS</i>                                                                                                                                                                                                                                                                                                                                                  |
| 12864.p1 | chr6  | 1622.6 | 1627.1 | 4.55  | 94    | Del | <i>PARK2</i>                                                                                                                                                                                                                                                                                                                                                 |
| 12885.p1 | chr5  | 1132.4 | 1140   | 7.62  | 60    | Del | <i>KCNN2</i>                                                                                                                                                                                                                                                                                                                                                 |
| 12892.p1 | chr11 | 994.2  | 1001.3 | 7.14  | 49    | Dup | <i>CNTN5, FLJ32810</i>                                                                                                                                                                                                                                                                                                                                       |
| 12916.p1 | chr13 | 694.8  | 704.9  | 10.16 | 85    | Dup | <i>KLHL1, ATXN8OS</i>                                                                                                                                                                                                                                                                                                                                        |
| 12940.p1 | chr3  | 22.8   | 27.9   | 5.07  | 151   | Dup | <i>CNTN4</i>                                                                                                                                                                                                                                                                                                                                                 |
| 12991.p1 | chr5  | 24.3   | 32.2   | 7.92  | 53    | Dup | <i>IRX2, C5orf38</i>                                                                                                                                                                                                                                                                                                                                         |
| 12996.p1 | chr6  | 1624.9 | 1627.7 | 2.82  | 56    | Del | <i>PARK2</i>                                                                                                                                                                                                                                                                                                                                                 |
| 13008.p1 | chr12 | 1.8    | 6.5    | 4.7   | 105   | Dup | <i>SLC6A12, SLC6A13, KDM5A, CCDC77, B4GALNT3, NINJ2</i>                                                                                                                                                                                                                                                                                                      |
| 13028.p1 | chr4  | 1231.7 | 1234.2 | 2.52  | 18    | Dup | <i>KIAA1109</i>                                                                                                                                                                                                                                                                                                                                              |
| 13038.p1 | chr2  | 1193   | 1197.4 | 4.39  | 34    | Dup | <i>EN1, MARCO, C1QL2, STEAP3</i>                                                                                                                                                                                                                                                                                                                             |
| 13064.p1 | chr15 | 964.6  | 969.9  | 5.3   | 32    | Dup | <i>FAM169B</i>                                                                                                                                                                                                                                                                                                                                               |
| 13064.p1 | chr3  | 1971.5 | 1988.8 | 17.31 | 2,387 | Del | <i>SDHALP1, TFRC, ZDHHC19, OSTalpha, PCYT1A, TCTEX1D2, TM4SF19, UBXN7, RNF168, C3orf43, WDR53, FBXO45, LRRC33, C3orf34, PIGX, PAK2, SENP5, NCBP2, LOC152217, PIGZ, MF12, DLG1, BDH1, LOC220729</i>                                                                                                                                                           |
| 13085.p1 | chr17 | 314.3  | 336.6  | 22.29 | 3,558 | Del | <i>CCL3, CCL4, TBC1D3B, CCL3L1, CCL3L3, CCL4L1, CCL4L2, TBC1D3C, CCL3L1, CCL3L3, CCL4L2, CCL4L1, TBC1D3H, TBC1D3C, TBC1D3G, ZNHIT3, MYO19, MYO19, PIGW, GGNBP2, DHRS11, MRM1, LHX1, AATF, ACACA, C17orf78, TADA2L, DUSP14, APIGBP1, DDX52, HNF1B, LOC284100, TBC1D3E, TBC1D3, TBC1D3F, TBC1D3E, TBC1D3D</i>                                                  |
| 13085.p1 | chr20 | 70.7   | 85.2   | 14.58 | 98    | Dup | <i>HAO1, TMX4, PLCB1</i>                                                                                                                                                                                                                                                                                                                                     |
| 13094.p1 | chr3  | 783    | 789.9  | 6.9   | 56    | Dup | <i>ROBO1</i>                                                                                                                                                                                                                                                                                                                                                 |
| 13106.p1 | chr17 | 99.3   | 103.6  | 4.22  | 112   | Dup | <i>GAS7, MYH13, MYH8, MYH4, MYH1</i>                                                                                                                                                                                                                                                                                                                         |
| 13119.p1 | chr22 | 460.7  | 495.6  | 34.8  | 4,710 | Del | <i>FAM19A5, FAM19A5, C22orf34, BRD1, LOC90834, ZBED4, ALG12, CRELD2, PIM3, IL17REL, TTLL8, MLC1, MOV10L1, PANX2, TRABD, SELO, TUBGCP6, HDAC10, MAPK12, MAPK11, PLXNB2, FAM116B, SAPS2, SBF1, ADM2, MIOX, LMF2, NCAPH2, NCAPH2, SCO2, TYMP, TYMP, ODF3B, KLHDC7B, C22orf41, CHKB, CPT1BCHKB, LOC100144603, MAPK8IP2, ARSA, SHANK3, ACR, RPL23AP82, RABL2B</i> |
| 13134.p1 | chr3  | 64.6   | 68.8   | 4.28  | 36    | Dup | <i>GRM7</i>                                                                                                                                                                                                                                                                                                                                                  |
| 13137.p1 | chr1  | 336.4  | 341.9  | 5.44  | 38    | Dup | <i>ZSCAN20, CSMD2, HMGB4</i>                                                                                                                                                                                                                                                                                                                                 |
| 13150.p1 | chr5  | 1303.1 | 1307.3 | 4.21  | 29    | Dup | <i>HINT1, LYRM7, CDC42SE2</i>                                                                                                                                                                                                                                                                                                                                |
| 13151.p1 | chr6  | 1621.7 | 1625   | 3.28  | 68    | Dup | <i>PARK2</i>                                                                                                                                                                                                                                                                                                                                                 |

|          |       |        |        |       |     |     |                                                                                                                                                                                                                                                           |
|----------|-------|--------|--------|-------|-----|-----|-----------------------------------------------------------------------------------------------------------------------------------------------------------------------------------------------------------------------------------------------------------|
| 13180.p1 | chr12 | 330.8  | 336.9  | 6.11  | 73  | Dup | <i>SYT10</i>                                                                                                                                                                                                                                              |
| 13214.p1 | chr10 | 815.8  | 819.6  | 3.85  | 534 | Del | <i>MBL1P1, SFTPD, LOC219347, C10orf57, PLAC9, ANXA11</i>                                                                                                                                                                                                  |
| 13287.p1 | chr13 | 185.4  | 188.4  | 3.02  | 22  | Del | <i>DKFZp686A1627, TUBA3C, LOC100101938</i>                                                                                                                                                                                                                |
| 13303.p1 | chr20 | 234.5  | 241.6  | 7.1   | 75  | Dup | <i>LOC164380, CST9L, CST9, CST3, CST4, CST1, CST2, CST5, GGTL1</i>                                                                                                                                                                                        |
| 13327.p1 | chr1  | 1194.7 | 1199.7 | 4.94  | 34  | Dup | <i>WARS2, HAO2, HSD3B2, HSD3B1, ZNF697</i>                                                                                                                                                                                                                |
| 13328.p1 | chr17 | 140.2  | 153.6  | 13.41 | 188 | Dup | <i>COX10, CDRT15, HS3ST3B1, MGC12916, PMP22, TEKT3, CDRT4, FAM18B2</i>                                                                                                                                                                                    |
| 13337.p1 | chr2  | 452.7  | 458.3  | 5.63  | 135 | Dup | <i>SRBD1, PRKCE</i>                                                                                                                                                                                                                                       |
| 13338.p1 | chr7  | 1415.8 | 1420.7 | 4.86  | 50  | Dup | <i>MOXD2, TRYX3</i>                                                                                                                                                                                                                                       |
| 13338.p1 | chr8  | 550    | 553.7  | 3.75  | 30  | Dup | <i>RGS20, TCEA1, LYPLA1, MRPL15</i>                                                                                                                                                                                                                       |
| 13346.p1 | chr1  | 933.2  | 963.3  | 30.11 | 222 | Del | <i>MTF2, TMED5, CCDC18, DR1, FNBP1L, BCAR3, DNNTIP2, GCLM, ABCA4, ARHGAP29, ABCD3, F3, SLC44A3, CNN3, ALG14, TMEM56, RWDD3</i>                                                                                                                            |
| 13346.p1 | chr1  | 990.1  | 1008.3 | 18.27 | 138 | Del | <i>PAP2D, LPPR4, PALMD, FRRS1, AGL, SLC35A3, HIAT1, SASS6, CCDC76, LRRC39, DBT, RTCD1, CDC14A, GPR88</i>                                                                                                                                                  |
| 13346.p1 | chr1  | 1123.7 | 1133.2 | 9.48  | 84  | Del | <i>CTTNBP2NL, WNT2B, ST7L, CAPZA1, MOV10, RHOC, PPM1J, FAM19A3, SLC16A1, AFAR1</i>                                                                                                                                                                        |
| 13355.p1 | chr15 | 245.2  | 251.3  | 6.12  | 95  | Dup | <i>GABRB3, GABRA5, GABRG3</i>                                                                                                                                                                                                                             |
| 13368.p1 | chr7  | 815.6  | 832.3  | 16.72 | 159 | Dup | <i>CACNA2D1, PCLO, PCLO, SEMA3E</i>                                                                                                                                                                                                                       |
| 13375.p1 | chr16 | 740.9  | 774.2  | 33.27 | 439 | Dup | <i>CHST5, FLJ22167, GABARAPL2, ADAT1, KARS, TERF2IP, CNTNAP4, MON1B, LOC100130958, ADAMTS18, NUDT7, VAT1L, CLEC3A, WWOX</i>                                                                                                                               |
| 13437.p1 | chr5  | 501.3  | 503.9  | 2.6   | 55  | Dup | <i>PARP8</i>                                                                                                                                                                                                                                              |
| 13451.p1 | chr8  | 852.3  | 931.8  | 79.51 | 796 | Del | <i>RALYL, LRRC1, E2F5, E2F5, C8orf59, CA13, CA1, CA3, CA2, REXO1L2P, REXO1L1, PSKH2, ATP6V0D2, SLC7A13, WWPI, FAM82B, CPNE3, CNGB3, CNBD1, WDR21C, MMP16, RIPK2, OSGIN2, NBN, DECR1, CALB1, TMEM64, NECAB1, TMEM55A, OTUD6B, LRRC69, SLC26A7, RUNX1T1</i> |
| 13491.p1 | chr17 | 140.2  | 154.3  | 14.12 | 199 | Dup | <i>COX10, CDRT15, HS3ST3B1, MGC12916, PMP22, TEKT3, CDRT4, FAM18B2</i>                                                                                                                                                                                    |
| 13499.p1 | chr5  | 1791.9 | 1794.4 | 2.54  | 20  | Dup | <i>SQSTM1, C5orf45, TBC1D9B, RNF130</i>                                                                                                                                                                                                                   |
| 13503.p1 | chr8  | 31.1   | 39     | 7.9   | 164 | Del | <i>CSMD1</i>                                                                                                                                                                                                                                              |
| 13508.p1 | chr18 | 729.4  | 737.7  | 8.38  | 50  | Dup | <i>MBP, GALR1</i>                                                                                                                                                                                                                                         |
| 13518.p1 | chr18 | 728.7  | 731.7  | 2.92  | 30  | Dup | <i>MBP, GALR1</i>                                                                                                                                                                                                                                         |
| 13521.p1 | chr6  | 576.4  | 626.8  | 50.4  | 129 | Dup | <i>GUSBL2, KHDRBS2</i>                                                                                                                                                                                                                                    |
| 13521.p1 | chr6  | 626.9  | 629.8  | 2.81  | 24  | Dup | <i>KHDRBS2</i>                                                                                                                                                                                                                                            |
| 13554.p1 | chr2  | 1871.6 | 1881.5 | 9.89  | 124 | Dup | <i>ITGAV, FAM171B, ZSWIM2, CALCRL, TFPI</i>                                                                                                                                                                                                               |
| 13555.p1 | chr14 | 344.3  | 347.5  | 3.17  | 44  | Dup | <i>C14orf19, SRP54, FAM177A1, PPP2R3C, KIAA0391</i>                                                                                                                                                                                                       |

|          |       |        |        |       |       |     |                                                                                                                                                                                                                                                                                                                                                 |
|----------|-------|--------|--------|-------|-------|-----|-------------------------------------------------------------------------------------------------------------------------------------------------------------------------------------------------------------------------------------------------------------------------------------------------------------------------------------------------|
| 13555.p1 | chr17 | 140.4  | 154    | 13.56 | 193   | Del | <i>COX10, CDRT15, HS3ST3B1, MGC12916, PMP22, TEKT3, CDRT4, FAM18B2</i>                                                                                                                                                                                                                                                                          |
| 13568.p1 | chr1  | 1186.2 | 1196.5 | 10.34 | 79    | Del | <i>TBX15, WARS2</i>                                                                                                                                                                                                                                                                                                                             |
| 13568.p1 | chr7  | 1447.8 | 1456.1 | 8.3   | 94    | Dup | <i>CNTNAP2</i>                                                                                                                                                                                                                                                                                                                                  |
| 13585.p1 | chr15 | 270    | 281.6  | 11.64 | 1,717 | Del | <i>APBA2, KIAA0574, NDNL2, TJP1</i>                                                                                                                                                                                                                                                                                                             |
| 13587.p1 | chr1  | 186.9  | 189.9  | 3.04  | 18    | Dup | <i>PAX7</i>                                                                                                                                                                                                                                                                                                                                     |
| 13590.p1 | chr13 | 321.9  | 339.6  | 17.73 | 139   | Dup | <i>PDS5B, KL, STARD13, RFC3</i>                                                                                                                                                                                                                                                                                                                 |
| 13601.p1 | chr2  | 1281.4 | 1290.8 | 9.45  | 64    | Dup | <i>LIMS2, SFT2D3, WDR33, POLR2D, AMMECR1L, SAP130, UGCGLI, HS6ST1</i>                                                                                                                                                                                                                                                                           |
| 13603.p1 | chr4  | 95.3   | 100.7  | 5.42  | 77    | Dup | <i>SLC2A9, WDRI, ZNF518B</i>                                                                                                                                                                                                                                                                                                                    |
| 13616.p1 | chr11 | 173.7  | 177.4  | 3.72  | 55    | Dup | <i>ABCC8, USH1C, MYOD1, KCNC1</i>                                                                                                                                                                                                                                                                                                               |
| 13616.p1 | chr7  | 977.1  | 979.9  | 2.78  | 18    | Dup | <i>TECPRI, BRI3, BAIAP2L1</i>                                                                                                                                                                                                                                                                                                                   |
| 13624.p1 | chr20 | 145.8  | 149.9  | 4.13  | 59    | Del | <i>MACROD2</i>                                                                                                                                                                                                                                                                                                                                  |
| 13641.p1 | chr19 | 620.8  | 623.5  | 2.78  | 26    | Dup | <i>USP29, ZIM3</i>                                                                                                                                                                                                                                                                                                                              |
| 13647.p1 | chr15 | 286.6  | 302.3  | 15.76 | 2,445 | Del | <i>FAM7A1, FAM7A2, ARHGAP11B, MTMR15, MTMR10, TRPM1, KLF13, OTUD7A, CHRNA7</i>                                                                                                                                                                                                                                                                  |
| 13676.p1 | chr1  | 1737   | 1740.3 | 3.28  | 48    | Dup | <i>TNR</i>                                                                                                                                                                                                                                                                                                                                      |
| 13688.p1 | chr8  | 133.9  | 136.5  | 2.61  | 21    | Dup | <i>DLCL1, C8orf48</i>                                                                                                                                                                                                                                                                                                                           |
| 13691.p1 | chr16 | 134.6  | 146.9  | 12.27 | 267   | Dup | <i>ERCC4, MKL2, PARN, BFAR, PLA2G10</i>                                                                                                                                                                                                                                                                                                         |
| 13696.p1 | chr6  | 654.8  | 660    | 5.24  | 43    | Dup | <i>EYS</i>                                                                                                                                                                                                                                                                                                                                      |
| 13697.p1 | chr3  | 1754.2 | 1759.9 | 5.75  | 45    | Dup | <i>NLGN1</i>                                                                                                                                                                                                                                                                                                                                    |
| 13700.p1 | chr8  | 1.7    | 69.1   | 67.47 | 1,103 | Del | <i>RPL23AP53, ZNF596, FBXO25, C8orf42, ERICH1, DLGAP2, CLN8, ARHGEF10, KBTBD11, MYOM2, CSMD1, MCPHI, ANGPT2, AGPAT5, XKR5, DEFBI, DEFA6, DEFA4, DEFA1, LOC728358, DEFA1, LOC728358, DEFA3, DEFA5</i>                                                                                                                                            |
| 13700.p1 | chr8  | 126.1  | 140.7  | 14.59 | 168   | Dup | <i>LONRF1, LOC340357, C8orf79, DLCL1, C8orf48, SGCZ</i>                                                                                                                                                                                                                                                                                         |
| 13716.p1 | chr7  | 249.1  | 253.3  | 4.17  | 33    | Dup | <i>OSBPL3, CYCS, C7orf31, NPVF</i>                                                                                                                                                                                                                                                                                                              |
| 13716.p1 | chr8  | 3.9    | 7      | 3.15  | 78    | Dup | <i>FBXO25, C8orf42, ERICH1</i>                                                                                                                                                                                                                                                                                                                  |
| 13722.p1 | chr3  | 1621.5 | 1626.5 | 5.04  | 85    | Del | <i>PPM1L, B3GALNT1, NMD3, C3orf57</i>                                                                                                                                                                                                                                                                                                           |
| 13724.p1 | chr9  | 1032.4 | 1056.1 | 23.65 | 213   | Dup | <i>C9orf125, RNF20, GRIN3A, PPP3R2, CYLC2</i>                                                                                                                                                                                                                                                                                                   |
| 13726.p1 | chr11 | 566    | 599.9  | 33.91 | 316   | Del | <i>LRRC55, APLNR, TNKS1BP1, SSRP1, P2RX3, PRG3, PRG2, SLC43A3, RTN4RL2, SLC43A1, TIMM10, SMTNL1, UBE2L6, SERPING1, YPEL4, CLP1, ZDHHC5, MED19, TMX2, C11orf31, LOC643376, CTNND1, OR9Q1, OR9I1, OR9Q2, OR1S2, OR1S1, OR10Q1, OR10W1, OR5B17, OR5B3, OR5B2, OR5B12, OR5B21, LPXN, ZFP91, ZFP91-CNTF, CNTF, GLYAT, GLYATL2, GLYATL1, FAM111B,</i> |

|          |       |        |        |        |     |     |                                                                                                                                                                                                                                                                                                                                                                                                                                                                                                    |
|----------|-------|--------|--------|--------|-----|-----|----------------------------------------------------------------------------------------------------------------------------------------------------------------------------------------------------------------------------------------------------------------------------------------------------------------------------------------------------------------------------------------------------------------------------------------------------------------------------------------------------|
|          |       |        |        |        |     |     | <i>FAM111A, DTX4, MPEG1, OR5AN1, OR5A2, OR5A1, OR4D6, OR4D10, OR4D11, OR4D9, OSBP, PATL1, OR10V1, STX3, MRPL16, GIF, TCN1, PLAC1L, MS4A3, MS4A2, MS4A6A, MS4A4A, MS4A6E, MS4A7, MS4A14, MS4A5, MS4A1</i>                                                                                                                                                                                                                                                                                           |
| 13739.p1 | chr3  | 22.8   | 27.9   | 5.07   | 151 | Dup | <i>CNTN4</i>                                                                                                                                                                                                                                                                                                                                                                                                                                                                                       |
| 13757.p1 | chr6  | 1187.5 | 1191.2 | 3.68   | 54  | Dup | <i>C6orf204, BRD7P3, PLN</i>                                                                                                                                                                                                                                                                                                                                                                                                                                                                       |
| 13759.p1 | chr17 | 781.8  | 785.2  | 3.45   | 29  | Dup | <i>WDR45L, RAB40B, FN3KRP, FN3K, TBCD, ZNF750, B3GNTL1</i>                                                                                                                                                                                                                                                                                                                                                                                                                                         |
| 13760.p1 | chr2  | 452.7  | 458.3  | 5.63   | 135 | Dup | <i>SRBD1, PRKCE</i>                                                                                                                                                                                                                                                                                                                                                                                                                                                                                |
| 13783.p1 | chr3  | 10.7   | 14.5   | 3.78   | 33  | Dup | <i>CNTN6</i>                                                                                                                                                                                                                                                                                                                                                                                                                                                                                       |
| 13786.p1 | chr9  | 258.9  | 269.1  | 10.17  | 80  | Dup | <i>C9orf82, PLAA</i>                                                                                                                                                                                                                                                                                                                                                                                                                                                                               |
| 13815.p1 | chr16 | 748.1  | 750.7  | 2.59   | 24  | Del | <i>CNTNAP4, CNTNAP4</i>                                                                                                                                                                                                                                                                                                                                                                                                                                                                            |
| 13817.p1 | chr20 | 80.4   | 85.2   | 4.8    | 54  | Del | <i>PLCBI</i>                                                                                                                                                                                                                                                                                                                                                                                                                                                                                       |
| 13830.p1 | chr3  | 607.7  | 664    | 56.34  | 461 | Del | <i>FHIT, PTPRG, ID2B, C3orf14, FEZF2, CADPS, LOC285401, SYNPR, S100A1L, C3orf49, THOC7, ATXN7, PSMD6, PRICKLE2, ADAMTS9, MAG11, SLC25A26</i>                                                                                                                                                                                                                                                                                                                                                       |
| 13845.p1 | chr3  | 18.8   | 25.6   | 6.79   | 153 | Dup | <i>CNTN4</i>                                                                                                                                                                                                                                                                                                                                                                                                                                                                                       |
| 13871.p1 | chr4  | 565.4  | 569.3  | 3.97   | 33  | Del | <i>CEP135, KIAA1211, AASDH</i>                                                                                                                                                                                                                                                                                                                                                                                                                                                                     |
| 13876.p1 | chr8  | 358.8  | 479.8  | 121.07 | 856 | Dup | <i>KCNU1, FKSG2, ZNF703, ERLIN2, LOC728024, PROSC, GPR124, BRF2, RAB11FIP1, GOT1L1, ADRB3, EIF4EBP1, ASH2L, ASH2L, STAR, LSM1, BAG4, DDHD2, PPAPDC1B, WHSC1L1, LETM2, FGFR1, C8orf86, RNF5P1, TACCI, PLEKHA2, HTRA4, TM2D2, ADAM9, ADAM32, ADAM5P, ADAM3A, ADAM18, ADAM2, IDO1, IDO2, C8orf4, ZMAT4, SFRP1, GOLGA7, GINS4, AGPAT6, NKX6-3, ANK1, MYST3, AP3M2, PLAT, IKBKB, POLB, DKK4, VDAC3, SLC20A2, C8orf40, CHRN3, CHRNA6, THAP1, RNF170, HOOK3, FNTA, SGK196, HGSNAT, POTE, BEYLA, BEYLA</i> |
| 13876.p1 | chr8  | 479.8  | 506    | 26.18  | 267 | Dup | <i>KIAA0146, CEBPD, PRKDC, MCM4, UBE2V2, EFCAB1, SNAI2, C8orf22</i>                                                                                                                                                                                                                                                                                                                                                                                                                                |
| 13877.p1 | chr3  | 779.3  | 844.9  | 65.6   | 534 | Del | <i>ROBO1, GBE1</i>                                                                                                                                                                                                                                                                                                                                                                                                                                                                                 |
| 13887.p1 | chr10 | 348.5  | 352.1  | 3.61   | 33  | Dup | <i>PARD3</i>                                                                                                                                                                                                                                                                                                                                                                                                                                                                                       |
| 13907.p1 | chr7  | 466.4  | 474.9  | 8.46   | 182 | Dup | <i>TNS3</i>                                                                                                                                                                                                                                                                                                                                                                                                                                                                                        |
| 13915.p1 | chr20 | 181.4  | 184.2  | 2.79   | 15  | Dup | <i>ZNF133, C20orf12, POLR3F, RBBP9</i>                                                                                                                                                                                                                                                                                                                                                                                                                                                             |
| 13926.p1 | chr11 | 312.5  | 315    | 2.51   | 24  | Del | <i>DCDC1, DNAJC24, IMMP1L, ELP4</i>                                                                                                                                                                                                                                                                                                                                                                                                                                                                |
| 13935.p1 | chr8  | 134    | 146.9  | 12.87  | 107 | Dup | <i>DLCL1, C8orf48, SGCZ</i>                                                                                                                                                                                                                                                                                                                                                                                                                                                                        |
| 13944.p1 | chr3  | 894.6  | 903.9  | 9.27   | 102 | Dup | <i>EPHA3</i>                                                                                                                                                                                                                                                                                                                                                                                                                                                                                       |
| 13945.p1 | chr12 | 425.3  | 428.9  | 3.58   | 27  | Dup | <i>TMEM117</i>                                                                                                                                                                                                                                                                                                                                                                                                                                                                                     |
| 13948.p1 | chr11 | 331.4  | 334.5  | 3.07   | 29  | Dup | <i>CSTF3, HIPK3</i>                                                                                                                                                                                                                                                                                                                                                                                                                                                                                |



|          |       |        |        |       |       |     |                                                                                                                                                                                                                                                                                                                                      |
|----------|-------|--------|--------|-------|-------|-----|--------------------------------------------------------------------------------------------------------------------------------------------------------------------------------------------------------------------------------------------------------------------------------------------------------------------------------------|
| 13949.p1 | chr3  | 20.1   | 23.6   | 3.49  | 60    | Dup | <i>CNTN4</i>                                                                                                                                                                                                                                                                                                                         |
| 13951.p1 | chr11 | 42.2   | 44.9   | 2.69  | 31    | Del | <i>OR52B4, TRIM21, OR52K2</i>                                                                                                                                                                                                                                                                                                        |
| 13962.p1 | chr2  | 506.5  | 511.1  | 4.59  | 95    | Del | <i>NRXN1</i>                                                                                                                                                                                                                                                                                                                         |
| 13982.p1 | chr5  | 993.3  | 1007.1 | 13.82 | 115   | Dup | <i>LOC100133050, FAM174A, ST8SIA4</i>                                                                                                                                                                                                                                                                                                |
| 13987.p1 | chr13 | 1097.5 | 1100.4 | 2.91  | 20    | Dup | <i>COL4A1, COL4A2, RAB20</i>                                                                                                                                                                                                                                                                                                         |
| 13988.p1 | chr3  | 0.8    | 3.9    | 3.14  | 63    | Dup | <i>CHL1</i>                                                                                                                                                                                                                                                                                                                          |
| 13988.p1 | chr6  | 1003.9 | 1007.5 | 3.64  | 29    | Dup | <i>MCHR2</i>                                                                                                                                                                                                                                                                                                                         |
| 13999.p1 | chr18 | 22.7   | 27.6   | 4.95  | 47    | Dup | <i>METTL4, NDC80, SMCHD1</i>                                                                                                                                                                                                                                                                                                         |
| 13999.p1 | chr2  | 2388   | 2393.3 | 5.3   | 60    | Del | <i>LOC151174, LOC643387, HES6, PER2, TRAF3IP1, ASB1</i>                                                                                                                                                                                                                                                                              |
| 14002.p1 | chr20 | 494.7  | 498    | 3.37  | 15    | Dup | <i>NFATC2, ATP9A</i>                                                                                                                                                                                                                                                                                                                 |
| 14016.p1 | chr6  | 14.4   | 16.9   | 2.54  | 36    | Dup | <i>FOXC1, GMDS</i>                                                                                                                                                                                                                                                                                                                   |
| 14018.p1 | chr3  | 22.6   | 27.6   | 5.03  | 150   | Dup | <i>CNTN4</i>                                                                                                                                                                                                                                                                                                                         |
| 14019.p1 | chr7  | 1576.3 | 1579.6 | 3.28  | 23    | Dup | <i>PTPRN2</i>                                                                                                                                                                                                                                                                                                                        |
| 14032.p1 | chr7  | 749.9  | 760.8  | 10.91 | 283   | Dup | <i>PMS2L3, HIP1, CCL26, CCL24, RHBDD2, POR, SNORA14A, TMEM120A, STYXL1, MDH2, FLJ37078, HSPB1, YWHAG, SRCRB4D, ZP3, DTX2, FDP2L2A, DTX2, UPK3B, POMZP3</i>                                                                                                                                                                           |
| 14044.p1 | chr13 | 189.9  | 194.7  | 4.79  | 116   | Dup | <i>TPTE2, MPHOSPH8, PSPCI, ZMYM5, ZMYM2</i>                                                                                                                                                                                                                                                                                          |
| 14046.p1 | chr11 | 1037.6 | 1046.1 | 8.51  | 154   | Dup | <i>CASP12, CASP4, CASP5, CASP1, CARD16, CARD17, CARD18</i>                                                                                                                                                                                                                                                                           |
| 14053.p1 | chr10 | 787.6  | 793.1  | 5.45  | 36    | Dup | <i>KCNMA1, KCNMA1, DLG5</i>                                                                                                                                                                                                                                                                                                          |
| 14066.p1 | chr1  | 1737   | 1740.3 | 3.28  | 48    | Dup | <i>TNR</i>                                                                                                                                                                                                                                                                                                                           |
| 14073.p1 | chr12 | 647.9  | 657.5  | 9.65  | 133   | Dup | <i>LLPH, TMBIM4, IRAK3, HELB, GRIPI</i>                                                                                                                                                                                                                                                                                              |
| 14073.p1 | chr15 | 970    | 975.4  | 5.48  | 81    | Del | <i>IGF1R, LOC145814, SYNM, TTC23</i>                                                                                                                                                                                                                                                                                                 |
| 14074.p1 | chr15 | 270    | 281.6  | 11.61 | 1,713 | Del | <i>APBA2, KIAA0574, NDNL2, TJP1</i>                                                                                                                                                                                                                                                                                                  |
| 14084.p1 | chr17 | 709.5  | 720.6  | 11.15 | 74    | Del | <i>KIAA0195, CASKIN2, TSEN54, LLGL2, MYO15B, RECQL5, LOC643008, RECQL5, SAP30BP, ITGB4GALK1, H3F3B, UNK, UNC13D, WBP2, TRIM47, TRIM65, MRPL38, FBF1, ACOX1, LOC100134934, CDK3, EVPL, SRP68, GALR2, ZACN, EXOC7, FOXJ1, RNF157, FAM100B, QRICH2, PRPSAP1, SPHK1, UBE2O, AANAT, RHBDF2, CYGB, PRCD</i>                                |
| 14091.p1 | chr10 | 1281.3 | 1352.3 | 70.98 | 764   | Del | <i>C10orf90, DOCK1, C10orf141, NPS, FOXI2, CLRN3, PTPRE, MKI67, MGMT, EBF3, GLRX3, TCERG1L, PPP2R2D, BNIP3, JAKMIP3, DPYSL4, STK32C, LRRC27, PWWP2B, C10orf91, INPP5A, NKX6-2, C10orf92, C10orf93, GPR123, KNDC1, UTF1, VENTX, ADAM8, TUBGCP2, ZNF511, CALY, PRAP1, C10orf125, ECHS1, PAOX, MTG1, SPRN, LOC619207, CYP2E1, SYCE1</i> |

|          |       |        |        |       |       |     |                                                                                                                                                                                                                                                                                                                                                                                                                                                                                                                                                                                                                                                                                                                                                                                                                                                                                                                                                                                                                                                                                                                                                                                                                                                                                                                                                                                                                                                                                                                                                                                                                                                                                                                                                                                                                                                                                        |
|----------|-------|--------|--------|-------|-------|-----|----------------------------------------------------------------------------------------------------------------------------------------------------------------------------------------------------------------------------------------------------------------------------------------------------------------------------------------------------------------------------------------------------------------------------------------------------------------------------------------------------------------------------------------------------------------------------------------------------------------------------------------------------------------------------------------------------------------------------------------------------------------------------------------------------------------------------------------------------------------------------------------------------------------------------------------------------------------------------------------------------------------------------------------------------------------------------------------------------------------------------------------------------------------------------------------------------------------------------------------------------------------------------------------------------------------------------------------------------------------------------------------------------------------------------------------------------------------------------------------------------------------------------------------------------------------------------------------------------------------------------------------------------------------------------------------------------------------------------------------------------------------------------------------------------------------------------------------------------------------------------------------|
| 14091.p1 | chr11 | 1304.1 | 1344.5 | 40.45 | 307   | Dup | <i>NTM, OPCML, OPCML, SPATA19, LOC283174, IGSF9B, LOC100128239, JAM3, NCAPD3, VPS26B, THYNI, ACAD8, GLB1L3, GLB1L2, B3GAT1</i>                                                                                                                                                                                                                                                                                                                                                                                                                                                                                                                                                                                                                                                                                                                                                                                                                                                                                                                                                                                                                                                                                                                                                                                                                                                                                                                                                                                                                                                                                                                                                                                                                                                                                                                                                         |
| 14098.p1 | chr5  | 8.7    | 11.5   | 2.79  | 59    | Dup | <i>ZDHHHC11, BRD9, TRIP13, NKD2, SLC12A7</i>                                                                                                                                                                                                                                                                                                                                                                                                                                                                                                                                                                                                                                                                                                                                                                                                                                                                                                                                                                                                                                                                                                                                                                                                                                                                                                                                                                                                                                                                                                                                                                                                                                                                                                                                                                                                                                           |
| 14112.p1 | chr11 | 853.5  | 862.6  | 9.16  | 84    | Dup | <i>PICALM, EED, C11orf73, C11orf73, CCDC81, ME3, PRSS23</i>                                                                                                                                                                                                                                                                                                                                                                                                                                                                                                                                                                                                                                                                                                                                                                                                                                                                                                                                                                                                                                                                                                                                                                                                                                                                                                                                                                                                                                                                                                                                                                                                                                                                                                                                                                                                                            |
| 14152.p1 | chr8  | 30.2   | 34.8   | 4.66  | 41    | Dup | <i>CSMD1</i>                                                                                                                                                                                                                                                                                                                                                                                                                                                                                                                                                                                                                                                                                                                                                                                                                                                                                                                                                                                                                                                                                                                                                                                                                                                                                                                                                                                                                                                                                                                                                                                                                                                                                                                                                                                                                                                                           |
| 14152.p1 | chr8  | 47.6   | 51.1   | 3.47  | 54    | Dup | <i>CSMD1</i>                                                                                                                                                                                                                                                                                                                                                                                                                                                                                                                                                                                                                                                                                                                                                                                                                                                                                                                                                                                                                                                                                                                                                                                                                                                                                                                                                                                                                                                                                                                                                                                                                                                                                                                                                                                                                                                                           |
| 14155.p1 | chr1  | 1737   | 1740.3 | 3.28  | 48    | Dup | <i>TNR</i>                                                                                                                                                                                                                                                                                                                                                                                                                                                                                                                                                                                                                                                                                                                                                                                                                                                                                                                                                                                                                                                                                                                                                                                                                                                                                                                                                                                                                                                                                                                                                                                                                                                                                                                                                                                                                                                                             |
| 14159.p1 | chr15 | 190.7  | 261.2  | 70.53 | 2,693 | Dup | <i>LOC646214, CXADRP2, POTE8, LOC727924, OR4M2, OR4N4, LOC650137, GOLGA8D, LOC283767, TUBGCP5, CYFIP1, NIPA2, NIPA1, WHAMML1, GOLGA9P, HERC2P2, GOLGA8E, MKRN3, MAGEL2, NDN, PWRN1, PWRN1, C15orf2, SNRPN, SNRPN, SNURF, SNORD107, PAR-SN, PAR5, SNORD64, SNORD108, SNORD109A, SNORD109B, SNORD116-1, SNORD116-2, SNORD116-9, SNORD116-3, SNORD116-4, SNORD116-7, SNORD116-5, SNORD116-6, SNORD116-2, SNORD116-7, SNORD116-5, SNORD116-8, SNORD116-9, SNORD116-3, SNORD116-10, SNORD116-11, SNORD116-12, SNORD116-13, SNORD116-14, SNORD116-15, SNORD116-16, SNORD116-19, SNORD116-17, SNORD116-18, SNORD116-19, SNORD116-17, SNORD116-20, SNORD116-21, SNORD116-22, SNORD116-23, SNORD116-24, SNORD116-25, SNORD116-26, SNORD116-27, SNORD116-28, SNORD116-29, IPW, PAR1, SNORD115-1, SNORD115-2, SNORD115-3, SNORD115-4, SNORD115-5, SNORD115-12, SNORD115-10, SNORD115-9, SNORD115-6, SNORD115-7, SNORD115-8, SNORD115-12, SNORD115-10, SNORD115-9, SNORD115-5, SNORD115-10, SNORD115-11, SNORD115-29, SNORD115-36, SNORD115-43, SNORD115-12, SNORD115-10, SNORD115-9, SNORD115-5, SNORD115-13, SNORD115-14, SNORD115-15, SNORD115-16, SNORD115-19, SNORD115-18, SNORD115-17, SNORD115-19, SNORD115-18, SNORD115-17, SNORD115-19, SNORD115-18, SNORD115-17, SNORD115-21, SNORD115-20, SNORD115-22, PAR4, SNORD115-23, HBII-52-24, SNORD115-25, SNORD115-26, HBII-52-27, HBII-52-28, SNORD115-11, SNORD115-29, SNORD115-36, SNORD115-43, SNORD115-30, SNORD115-31, SNORD115-32, SNORD115-33, SNORD115-34, SNORD115-35, SNORD115-11, SNORD115-29, SNORD115-36, SNORD115-43, SNORD115-37, SNORD115-38, SNORD115-39, SNORD115-40, SNORD115-41, SNORD115-42, SNORD115-10, SNORD115-15, SNORD115-11, SNORD115-36, SNORD115-29, SNORD115-43, SNORD115-44, HBII-52-45, HBII-52-46, SNORD115-48, SNORD109A, SNORD109B, UBE3A, UBE3A, ATP10A, GABRB3, GABRB3, GABRA5, GABRG3, OCA2, HERC2</i> |
| 14161.p1 | chr17 | 99.3   | 103.6  | 4.22  | 111   | Dup | <i>GAS7, MYH13, MYH8, MYH4, MYH1</i>                                                                                                                                                                                                                                                                                                                                                                                                                                                                                                                                                                                                                                                                                                                                                                                                                                                                                                                                                                                                                                                                                                                                                                                                                                                                                                                                                                                                                                                                                                                                                                                                                                                                                                                                                                                                                                                   |
| 14161.p1 | chr7  | 1575.6 | 1580.8 | 5.18  | 46    | Dup | <i>PTPRN2</i>                                                                                                                                                                                                                                                                                                                                                                                                                                                                                                                                                                                                                                                                                                                                                                                                                                                                                                                                                                                                                                                                                                                                                                                                                                                                                                                                                                                                                                                                                                                                                                                                                                                                                                                                                                                                                                                                          |

|          |       |        |        |       |       |     |                                                                                                                                                                                                                                                                                                                                              |
|----------|-------|--------|--------|-------|-------|-----|----------------------------------------------------------------------------------------------------------------------------------------------------------------------------------------------------------------------------------------------------------------------------------------------------------------------------------------------|
| 14166.p1 | chr3  | 818.7  | 833.9  | 15.13 | 126   | Del | <i>GBE1</i>                                                                                                                                                                                                                                                                                                                                  |
| 14174.p1 | chr5  | 456.9  | 461.5  | 4.64  | 54    | Dup | <i>HCN1</i>                                                                                                                                                                                                                                                                                                                                  |
| 14175.p1 | chr1  | 1737   | 1740.3 | 3.28  | 48    | Dup | <i>TNR</i>                                                                                                                                                                                                                                                                                                                                   |
| 14176.p1 | chr6  | 1188.2 | 1191.4 | 3.13  | 51    | Dup | <i>C6orf204, BRD7P3, PLN</i>                                                                                                                                                                                                                                                                                                                 |
| 14195.p1 | chr7  | 81.5   | 85     | 3.46  | 66    | Dup | <i>ICAI, NXPH1</i>                                                                                                                                                                                                                                                                                                                           |
| 14196.p1 | chr18 | 129.1  | 131.9  | 2.78  | 14    | Dup | <i>SEHIL, CEP192</i>                                                                                                                                                                                                                                                                                                                         |
| 14204.p1 | chr3  | 965.7  | 1009   | 43.26 | 372   | Dup | <i>EPHA6, ARL6, CRYBG3, MINA, GABRR3, OR5AC2, OR5H1, OR5H14, OR5H15, OR5H6, OR5H2, OR5K4, OR5K3, OR5K1, OR5K2, CLDND1, GPR15, CPOX, ST3GAL6, DCBLD2, COL8A1</i>                                                                                                                                                                              |
| 14226.p1 | chr11 | 749.7  | 755.2  | 5.49  | 41    | Dup | <i>MAP6, MOGAT2, DGAT2, UVRAG</i>                                                                                                                                                                                                                                                                                                            |
| 14232.p1 | chr22 | 465.7  | 495.7  | 30.03 | 4,084 | Del | <i>FAM19A5, C22orf34, BRD1, LOC90834, ZBED4, ALG12, CRELD2, PIM3, ILI7REL, TTLL8, MLC1, MOV10L1, PANX2, TRABD, SELO, TUBGCP6, HDAC10, MAPK12, MAPK11, PLXNB2, FAM116B, SAPS2, SBF1, ADM2, MIOX, LMF2, NCAPH2, SCO2, TYMP, ODF3B, KLHDC7B, C22orf41, CHKB, CPT1B, LOC100144603, MAPK8IP2, ARSA, SHANK3, ACR, RPL23AP82, RABL2B, RPL23AP82</i> |
| 14237.p1 | chr7  | 291.8  | 295.1  | 3.27  | 35    | Dup | <i>CHN2</i>                                                                                                                                                                                                                                                                                                                                  |
| 14238.p1 | chr18 | 92.8   | 95.4   | 2.61  | 22    | Del | <i>TWSG1, RALBP1, PPP4R1</i>                                                                                                                                                                                                                                                                                                                 |
| 14240.p1 | chr1  | 2395.6 | 2399   | 3.4   | 26    | Dup | <i>RGS7, FH, KMO, OPN3, CHML</i>                                                                                                                                                                                                                                                                                                             |
| 14249.p1 | chr20 | 80.4   | 85.2   | 4.8   | 54    | Del | <i>PLCBI</i>                                                                                                                                                                                                                                                                                                                                 |
| 14250.p1 | chr2  | 1062.6 | 1073.8 | 11.25 | 259   | Dup | <i>PLGLA, RGPD3, ST6GAL2</i>                                                                                                                                                                                                                                                                                                                 |
| 14252.p1 | chr15 | 829.4  | 835.3  | 5.85  | 897   | Dup | <i>ZSCAN2, SCAND2, WDR73, NMB, SEC11A, ZNF592, ALPK3, SLC28A1, PDE8A</i>                                                                                                                                                                                                                                                                     |
| 14254.p1 | chr9  | 710.4  | 759.1  | 48.61 | 481   | Del | <i>TJP2, C9orf61, APBA1, PTAR1, C9orf135, MAMDC2, SMC5, KLF9, TRPM3, TMEM2, FAM108B1, C9orf85, HSPBL2, C9orf57, GDA, ZFAND5, TMCI, ALDH1A1, ANXA1</i>                                                                                                                                                                                        |
| 14266.p1 | chr13 | 224.3  | 238.6  | 14.27 | 312   | Del | <i>SGCG, SACS, TNFRSF19, MIPEP, PCOTH, RP11-45B20.2, SPATA13, C1QTNF9</i>                                                                                                                                                                                                                                                                    |
| 14267.p1 | chr22 | 213.3  | 219.9  | 6.57  | 153   | Dup | <i>RTDRI, GNAZ, RAB36, BCR</i>                                                                                                                                                                                                                                                                                                               |
| 14270.p1 | chr11 | 459.2  | 470.6  | 11.39 | 148   | Del | <i>PHF21A, CREB3L1, DGKZ, MDK, CHRM4, AMBRA1, HARBII, KIAA0652, ARHGAP1, ZNF408, F2, CKAP5, SNORD67, LRP4, C11orf49</i>                                                                                                                                                                                                                      |
| 14274.p1 | chr3  | 413.1  | 416    | 2.86  | 23    | Del | <i>ULK4</i>                                                                                                                                                                                                                                                                                                                                  |
| 14286.p1 | chr2  | 2424.1 | 2427   | 2.94  | 60    | Dup | <i>NEU4, PDCD1, C2orf85, LOC728323</i>                                                                                                                                                                                                                                                                                                       |
| 14293.p1 | chr18 | 638.5  | 646.8  | 8.36  | 68    | Dup | <i>TMX3, CCDC102B, CCDC102B</i>                                                                                                                                                                                                                                                                                                              |
| 14297.p1 | chr1  | 1829.7 | 1833.9 | 4.24  | 30    | Dup | <i>EDEM3, FAM129A, RNF2, C1orf25</i>                                                                                                                                                                                                                                                                                                         |

|           |       |        |        |       |       |     |                                                                                                                                                                                                                                                           |
|-----------|-------|--------|--------|-------|-------|-----|-----------------------------------------------------------------------------------------------------------------------------------------------------------------------------------------------------------------------------------------------------------|
| 14349.p1  | chr9  | 1.9    | 16.6   | 14.62 | 229   | Dup | <i>C9orf66, DOCK8, KANK1, DMRT1, DMRT3, DMRT2</i>                                                                                                                                                                                                         |
| 14365.p1  | chr1  | 2041.5 | 2044.9 | 3.45  | 15    | Del | <i>SLC26A9, FAM72A, AVPR1B, C1orf186, CTSE</i>                                                                                                                                                                                                            |
| 14376.p1  | chr17 | 100.1  | 105.3  | 5.23  | 138   | Dup | <i>GAS7, MYH13, MYH8, MYH4, MYH1, MYH2, MYH3, SCO1</i>                                                                                                                                                                                                    |
| 14376.p1  | chr9  | 701.7  | 778    | 76.33 | 785   | Del | <i>PGM5, C9orf71, PIP5K1B, FAM122A, PRKACG, FXN, TJP2, C9orf61, APBA1, PTAR1, C9orf135, MAMDC2, SMC5, KLF9, TRPM3, TMEM2, FAM108B1, C9orf85, HSPBL2, C9orf57, GDA, ZFAND5, TMC1, ALDH1A1, ANXA1, RORB, TRPM6, C9orf40, C9orf41, C9orf95, OSTF1, PCSK5</i> |
| 14415.p1  | chr16 | 762.5  | 769.7  | 7.16  | 115   | Dup | <i>NUDT7, NUDT7, VAT1L, CLEC3A, WWOX</i>                                                                                                                                                                                                                  |
| 14438.p1  | chr2  | 1902.1 | 1907.3 | 5.27  | 41    | Del | <i>ASNSD1, ANKAR, OSGEPL1, ORMDL1, PMS1, MSTN, C2orf88</i>                                                                                                                                                                                                |
| 14438.p1  | chr5  | 654.8  | 663.1  | 8.28  | 61    | Dup | <i>SFRS12, MAST4</i>                                                                                                                                                                                                                                      |
| 14440.p1  | chr22 | 362.5  | 367.1  | 4.66  | 81    | Dup | <i>CDC42EPI, LGALS2, GGA1, SH3BP1, PDXP, LGALS1, NOL12, TRIOBP, HIF0, GCAT, GALR3, ANKRD54, EIF3L, MICALL1, C22orf23, POLR2F, SOX10</i>                                                                                                                   |
| 14442.p1  | chr6  | 58.4   | 61.1   | 2.72  | 18    | Dup | <i>NRN1, F13A1</i>                                                                                                                                                                                                                                        |
| 14443.p1  | chr15 | 973    | 978.1  | 5.15  | 81    | Dup | <i>IGF1R, LOC145814, SYNM, TTC23, LRRC28</i>                                                                                                                                                                                                              |
| 14452.p1  | chr13 | 197    | 200    | 3.04  | 67    | Del | <i>GJB6, CRYL1</i>                                                                                                                                                                                                                                        |
| 14473.p1  | chr6  | 1254.8 | 1257.5 | 2.69  | 67    | Del | <i>TPD52L1, HDDC2</i>                                                                                                                                                                                                                                     |
| 14478.p1  | chr5  | 1374.9 | 1381.6 | 6.69  | 105   | Dup | <i>NME5, BRD8, KIF20A, CDC23, GFRA3, CDC25C, FAM53C, KDM3B, REEP2, EGRI, ETF1, HSPA9, SNORD63, CTNNA1</i>                                                                                                                                                 |
| 14487.p1  | chr10 | 679.9  | 682.8  | 2.91  | 24    | Del | <i>CTNNA3</i>                                                                                                                                                                                                                                             |
| 14491.p1  | chr17 | 140.2  | 153.8  | 13.62 | 194   | Del | <i>COX10, CDRT15, HS3ST3B1, MGC12916, PMP22, TEK3, CDRT4, FAM18B2</i>                                                                                                                                                                                     |
| AU1813301 | chr1  | 59.5   | 64.9   | 5.4   | 36    | Dup | <i>NPHP4, KCNAB2, CHD5, RPL22, RNF207, ICMT, HES3, GPR153, ACOT7, HES2, ESPN, TNFRSF25, TNFRSF25, PLEKHG5</i>                                                                                                                                             |
| AU1813301 | chr12 | 1233.6 | 1236.7 | 3.2   | 79    | Dup | <i>FAM101A, NCOR2</i>                                                                                                                                                                                                                                     |
| AU1813301 | chr16 | 161.3  | 187    | 25.7  | 2,069 | Dup | <i>ABCC1, ABCC6, NOMO3, LOC339047, XYLT1, LOC339047, NOMO2, ABCC6P1</i>                                                                                                                                                                                   |
| AU062003  | chr6  | 626.9  | 629.9  | 2.91  | 25    | Dup | <i>KHDRBS2</i>                                                                                                                                                                                                                                            |
| AU083204  | chr15 | 998.5  | 1001.3 | 2.78  | 52    | Dup | <i>TM2D3, TARSL2</i>                                                                                                                                                                                                                                      |
| AU074403  | chr13 | 197    | 200    | 3.04  | 67    | Del | <i>GJB6, CRYL1</i>                                                                                                                                                                                                                                        |
| AU079605  | chr16 | 807.8  | 812.9  | 5.09  | 34    | Dup | <i>CDH13</i>                                                                                                                                                                                                                                              |
| AU028905  | chr17 | 99.3   | 103.6  | 4.22  | 112   | Dup | <i>GAS7, MYH13, MYH8, MYH4, MYH1</i>                                                                                                                                                                                                                      |
| AU026604  | chr14 | 804.7  | 870.7  | 65.95 | 518   | Dup | <i>C1orf145, TSHR, GTF2A1, SNORA79, STON2, SEL1L, FLRT2</i>                                                                                                                                                                                               |
| AU3019302 | chr19 | 496    | 503.7  | 7.66  | 136   | Del | <i>ZNF229, ZNF180, CEACAM20, PVR, PVR, CEACAM19, CEACAM16, BCL3, CBLC, BCAM, BCAM, PVRL2, PVRL2, TOMM40, APOE, APOC1, APOC4, APOC2, CLPTM1, RELB, SFRS16, ZNF296, GEMIN7, GEMIN7, NKPD1, NKPD1,</i>                                                       |

|           |       |        |        |       |     |     |                                                                                                                          |
|-----------|-------|--------|--------|-------|-----|-----|--------------------------------------------------------------------------------------------------------------------------|
|           |       |        |        |       |     |     | <i>TRAPPC6A</i>                                                                                                          |
| AU1172301 | chr6  | 1445.8 | 1448.4 | 2.59  | 23  | Dup | <i>UTRN</i>                                                                                                              |
| AU0881301 | chr3  | 1375.4 | 1379.3 | 3.85  | 38  | Dup | <i>STAG1</i>                                                                                                             |
| AU072203  | chr16 | 344.6  | 349.9  | 5.33  | 58  | Dup | <i>LOC283914, LOC146481</i>                                                                                              |
| AU1039302 | chr4  | 739.7  | 742.8  | 3.1   | 53  | Dup | <i>COX18, ANKRD17</i>                                                                                                    |
| AU0915301 | chr19 | 234.2  | 238.5  | 4.37  | 22  | Del | <i>ZNF675, ZNF681, RPSAP58</i>                                                                                           |
| AU0979301 | chr7  | 25.9   | 30.3   | 4.45  | 35  | Dup | <i>IQCE, TTYH3, AMZI, GNAI2, CARD11</i>                                                                                  |
| AU1286301 | chr4  | 935    | 946.3  | 11.33 | 131 | Dup | <i>GRID2</i>                                                                                                             |
| AU1181301 | chr4  | 1585.4 | 1595.7 | 10.26 | 79  | Dup | <i>LOC340017, C4orf18, TMEM144</i>                                                                                       |
| AU0981301 | chr10 | 949.7  | 953.5  | 3.78  | 26  | Dup | <i>MYOF, CEP55GPR120, RBP4</i>                                                                                           |
| AU1361302 | chr20 | 293    | 296.3  | 3.34  | 52  | Dup | <i>DEFB115, DEFB116, DEFB118, DEFB119, DEFB119, DEFB121, DEFB122, DEFB123, DEFB124, REM1, NCRNA00028, HM13, PSIMCT-1</i> |
| AU044004  | chr7  | 170.3  | 174.1  | 3.8   | 44  | Dup | <i>AHR</i>                                                                                                               |
| AU044004  | chr9  | 1398.9 | 1402.2 | 3.23  | 68  | Dup | <i>CACNA1B, LOC643224</i>                                                                                                |
| AU029303  | chr5  | 601.4  | 608.4  | 6.99  | 54  | Dup | <i>ELOVL7, ERCC8, NDUFAF2, C5orf43, ZSWIM6</i>                                                                           |
| AU008003  | chr5  | 373.1  | 375.7  | 2.66  | 24  | Dup | <i>NUP155, NUP155, WDR70</i>                                                                                             |
| AU1765302 | chr3  | 10.6   | 23.6   | 12.96 | 127 | Dup | <i>CNTN6, CNTN4</i>                                                                                                      |
| AU083503  | chr3  | 1290.2 | 1296.6 | 6.36  | 136 | Dup | <i>MGLL, KLHDC6, SEC61A1, RUVBL1, EEFSEC</i>                                                                             |
| AU020604  | chr4  | 1887.1 | 1898.1 | 11.02 | 82  | Dup | <i>ZFP42, TRIML2, TRIML1</i>                                                                                             |
| AU064104  | chr2  | 1214   | 1222.8 | 8.76  | 78  | Dup | <i>GLI2, TFCP2L1, CLASP1, RNU4ATAC, MKI67IP, TSN</i>                                                                     |
| AU2050301 | chr20 | 181.4  | 184.2  | 2.79  | 15  | Dup | <i>ZNF133, C20orf12, POLR3F, RBBP9</i>                                                                                   |
| AU1551302 | chr16 | 688.5  | 700    | 11.48 | 336 | Dup | <i>AARS, DDX19B, DDX19A, ST3GAL2, FUK, COG4, SF3B3, SNORD111B, SNORD111, IL34, MTSS1L, VAC14, HYDIN, FTSJD1, CALB2</i>   |
| AU1492301 | chr5  | 191.6  | 197.8  | 6.17  | 54  | Dup | <i>CDH18</i>                                                                                                             |
| AU1534301 | chr5  | 783.8  | 788    | 4.21  | 59  | Dup | <i>DMGDH, BHMT2, BHMT, JMY, HOMER1</i>                                                                                   |
| AU1379301 | chr8  | 1309.3 | 1312   | 2.67  | 52  | Dup | <i>FAM49B, ASAP1</i>                                                                                                     |
| AU1203303 | chr5  | 66.3   | 72.2   | 5.88  | 51  | Dup | <i>LOC255167, NSUN2, SRD5A1, POLS</i>                                                                                    |
| AU1482302 | chr12 | 1311.5 | 1320.3 | 8.78  | 64  | Del | <i>EP400NL, DDX51, NOC4L, GALNT9LOC100130238, FBRSL1, P2RX2, POLE, PXMP2, PGAM5, ANKLE2, GOLGA3, CHFR, ZNF605</i>        |
| AU1495303 | chr2  | 508.8  | 512.6  | 3.74  | 57  | Del | <i>NRXN1</i>                                                                                                             |
| AU1300302 | chr9  | 97.4   | 102.9  | 5.47  | 108 | Del | <i>PTPRD</i>                                                                                                             |

|           |       |        |        |       |       |     |                                                                                                                                                                                         |
|-----------|-------|--------|--------|-------|-------|-----|-----------------------------------------------------------------------------------------------------------------------------------------------------------------------------------------|
| AU2557302 | chr12 | 1006.2 | 1011.4 | 5.17  | 43    | Dup | <i>CHPT1, SYCP3, GNPTAB, DRAM, CCDC53, NUP37, C12orf48, PMCH</i>                                                                                                                        |
| AU2482301 | chr2  | 2165.6 | 2168.7 | 3.12  | 23    | Dup | <i>MREG, PECR, TMEM169, XRCC5, MARCH4</i>                                                                                                                                               |
| AU2908301 | chr4  | 1231.7 | 1234.4 | 2.7   | 19    | Dup | <i>KIAA1109</i>                                                                                                                                                                         |
| AU1536304 | chr8  | 134    | 146.9  | 12.87 | 107   | Dup | <i>DLC1, C8orf48, SGCZ</i>                                                                                                                                                              |
| AU005303  | chr3  | 35.7   | 38.6   | 2.88  | 47    | Dup | <i>LRRN1</i>                                                                                                                                                                            |
| AU063004  | chr16 | 100    | 104.3  | 4.29  | 32    | Dup | <i>GRIN2A</i>                                                                                                                                                                           |
| AU2581302 | chr4  | 482.8  | 487.8  | 4.94  | 64    | Dup | <i>FRYL, OCIAD1, OCIAD2, FLJ21511</i>                                                                                                                                                   |
| AU020103  | chr3  | 12.9   | 15.6   | 2.72  | 20    | Dup | <i>CNTN6</i>                                                                                                                                                                            |
| AU1631301 | chr7  | 178.2  | 183.3  | 5.04  | 41    | Dup | <i>SNX13, PRPS1L1</i>                                                                                                                                                                   |
| AU1887301 | chr20 | 80.4   | 85.2   | 4.8   | 54    | Dup | <i>PLCB1</i>                                                                                                                                                                            |
| AU1744301 | chr13 | 190.3  | 195    | 4.76  | 117   | Dup | <i>MPHOSPH8, PSPC1, ZMYM5, ZMYM2</i>                                                                                                                                                    |
| AU0884301 | chr3  | 1239   | 1242.3 | 3.24  | 25    | Dup | <i>PARP14, HSPBAP1, DIRC2, LOC100129550, SEMA5B</i>                                                                                                                                     |
| AU0962303 | chr4  | 1650.3 | 1656.9 | 6.62  | 104   | Dup | <i>ANP32C</i>                                                                                                                                                                           |
| AU1448301 | chr19 | 496    | 503.7  | 7.66  | 136   | Del | <i>ZNF229, ZNF180, CEACAM20, PVR, PVR, CEACAM19, CEACAM16, BCL3, CBLC, BCAM, PVRL2, TOMM40, APOE, APOC1, APOC4, APOC2, CLPTM1, RELB, SFRS16, ZNF296, GEMIN7, NKPD1, NKPD1, TRAPPC6A</i> |
| AU2372301 | chr9  | 65.6   | 70.1   | 4.47  | 107   | Dup | <i>GLDC, KDM4C</i>                                                                                                                                                                      |
| AU1081301 | chr12 | 898.3  | 901.9  | 3.59  | 30    | Del | <i>C12orf12, EPYC, KERA, LUM, DCN</i>                                                                                                                                                   |
| AU1081301 | chr7  | 81.6   | 84.6   | 3.02  | 58    | Dup | <i>ICAI, NXPH1</i>                                                                                                                                                                      |
| AU2182302 | chr10 | 426.8  | 429.4  | 2.66  | 43    | Del | <i>RET</i>                                                                                                                                                                              |
| AU2554301 | chr3  | 584.6  | 601.5  | 16.86 | 266   | Dup | <i>ACOX2, FAM107A, FAM3D, C3orf67, FHIT</i>                                                                                                                                             |
| AU2689306 | chr20 | 80.4   | 85.2   | 4.8   | 54    | Dup | <i>PLCB1</i>                                                                                                                                                                            |
| AU2814301 | chr5  | 373.3  | 376.2  | 2.93  | 27    | Dup | <i>NUP155, NUP155, WDR70</i>                                                                                                                                                            |
| AU021005  | chr10 | 426.3  | 429.4  | 3.1   | 45    | Del | <i>BMS1, RET</i>                                                                                                                                                                        |
| AU082505  | chr3  | 21.9   | 24.5   | 2.6   | 54    | Dup | <i>CNTN4</i>                                                                                                                                                                            |
| AU1977303 | chr18 | 638.5  | 646.8  | 8.36  | 68    | Dup | <i>TMX3, CCDC102B</i>                                                                                                                                                                   |
| AU1802301 | chr15 | 287    | 302.3  | 15.31 | 2,334 | Del | <i>ARHGAP11B, MTMR15, MTMR15, MTMR10, TRPM1, KLF13, OTUD7A, CHRNA7</i>                                                                                                                  |
| AU1230301 | chr11 | 330.7  | 334.3  | 3.51  | 33    | Dup | <i>CSTF3, HIPK3</i>                                                                                                                                                                     |
| AU002804  | chr14 | 698.9  | 701.9  | 3.04  | 22    | Dup | <i>COX16, SYNJ2BP, ADAM21, ADAM20, MED6, TTC9</i>                                                                                                                                       |
| 13521.p1  | chr6  | 576.4  | 629.8  | 53.32 |       | Dup | <i>GUSBL2, KHDRBS2</i>                                                                                                                                                                  |

|           |       |        |        |       |  |     |                                                                                                                                                                                                                                                                                               |
|-----------|-------|--------|--------|-------|--|-----|-----------------------------------------------------------------------------------------------------------------------------------------------------------------------------------------------------------------------------------------------------------------------------------------------|
| 12430.p1  | chr6  | 575.9  | 625    | 49.1  |  | Dup | <i>PRIM2, GUSBL2, KHDRBS2</i>                                                                                                                                                                                                                                                                 |
| 12691.p1  | chr16 | 688.6  | 729    | 40.44 |  | Del | <i>HYDIN</i>                                                                                                                                                                                                                                                                                  |
| AU004104  | chr22 | 207.2  | 233.3  | 26.13 |  | Dup | <i>MANY GENES</i>                                                                                                                                                                                                                                                                             |
| 13727.p1  | chr9  | 934.6  | 958.9  | 24.34 |  | Dup | <i>RORS, SPTLC1, IARS, NOL8, CENPP, OGN, OMD, ASPN, ECM2, IPPK, BICD2, ZNF484, FGD3, SUSD3, C9orf89, NINJ1, WNK2, C9orf129, FAM120AOS, FAM120A, PHF2, BARX1, PTPDC1</i>                                                                                                                       |
| 12162.p1  | chr1  | 2281.9 | 2302   | 20.14 |  | Del | <i>GALNT2, PGBD5, COG2, AGT, CAPN9, CAPN9, C1orf198, C1orf198, C1orf198, TTC13, ARV1, FAM89A, TRIM67, C1orf131, GNPAT, EXOC8, C1orf124, EGLN1, TSNAX, DISC1, DISC1, DISC1, DISC1, DISC2</i>                                                                                                   |
| 12053.p1  | chr7  | 1144.5 | 1161.4 | 16.91 |  | Dup | <i>TFEC, TES, CAV2, CAV1, MET</i>                                                                                                                                                                                                                                                             |
| 11398.p1  | chr7  | 111.7  | 124.4  | 12.72 |  | Dup | <i>PHF14, THSD7A, TMEM106B, VWDE</i>                                                                                                                                                                                                                                                          |
| AU1551302 | chr16 | 688.3  | 700.1  | 11.74 |  | Dup | <i>HYDIN</i>                                                                                                                                                                                                                                                                                  |
| 13804.p1  | chr22 | 221.6  | 233.3  | 11.71 |  | Dup | <i>IGLL1, C22orf43, LOC91316, RGL4, ZNF70, VPRESB3, C22orf15, CHCHD10, MMP11, SMARCB1, DERL3, SLC2A11, SLC2A11, MIF, GSTT2B, GSTT2, DDTL, DDT, DDT, GSTT2, GSTTP1, LOC391322, GSTT1, GSTTP2, CABIN1, SUSD2, GGT5, POM121L9P, CYTSA, ADORA2A, UPB1, C22orf13, SNRPD3, GGT1, C22orf36, GGT1</i> |
| 13769.p1  | chr16 | 688.8  | 698.1  | 9.25  |  | Dup | <i>HYDIN</i>                                                                                                                                                                                                                                                                                  |
| 11013.p1  | chr20 | 75.1   | 82.7   | 7.57  |  | Dup | <i>HAO1, TMX4, PLCB1</i>                                                                                                                                                                                                                                                                      |
| 14363.p1  | chr9  | 43.1   | 50.2   | 7.03  |  | Dup | <i>SLC1A1, C9orf68, PPAPDC2, CDC37L1, AK3, RCL1, JAK2</i>                                                                                                                                                                                                                                     |
| 11551.p1  | chr16 | 87.1   | 92.5   | 5.45  |  | Dup | <i>ABAT, C16orf72, CARHSP1, PMM2, TMEM186, USP7</i>                                                                                                                                                                                                                                           |
| 14221.p1  | chr7  | 1106   | 1110.3 | 4.3   |  | Del | <i>IMMP2L</i>                                                                                                                                                                                                                                                                                 |
| AU1496302 | chr9  | 1.6    | 5.5    | 3.85  |  | Dup | <i>CBWD1, C9orf66, DOCK8, KANK1</i>                                                                                                                                                                                                                                                           |
| 11710.p1  | chr5  | 138.6  | 142.3  | 3.77  |  | Dup | <i>DNAH5, TRIO</i>                                                                                                                                                                                                                                                                            |
| AU079605  | chr6  | 1626.2 | 1629.8 | 3.55  |  | Dup | <i>PARK2</i>                                                                                                                                                                                                                                                                                  |
| 11811.p1  | chr2  | 2127.7 | 2131.2 | 3.52  |  | Del | <i>ERBB4</i>                                                                                                                                                                                                                                                                                  |
| AU1453302 | chr7  | 1107.6 | 1111   | 3.48  |  | Del | <i>IMMP2L</i>                                                                                                                                                                                                                                                                                 |
| AU003705  | chr7  | 81.5   | 85     | 3.46  |  | Dup | <i>ICAI, NXPH1</i>                                                                                                                                                                                                                                                                            |
| 11479.p1  | chr7  | 1107.9 | 1110.9 | 2.99  |  | Del | <i>IMMP2L</i>                                                                                                                                                                                                                                                                                 |
| 14326.p1  | chr7  | 1108.4 | 1111.4 | 2.98  |  | Del | <i>IMMP2L</i>                                                                                                                                                                                                                                                                                 |
| 12265.p1  | chr16 | 86.6   | 89.5   | 2.94  |  | Dup | <i>ABAT</i>                                                                                                                                                                                                                                                                                   |
| 13572.p1  | chr9  | 44.6   | 47.4   | 2.75  |  | Dup | <i>SLC1A1, C9orf68, PPADC2, CDC37LL1, AK3</i>                                                                                                                                                                                                                                                 |

|          |      |        |        |      |  |     |              |
|----------|------|--------|--------|------|--|-----|--------------|
| 12058.p1 | chr3 | 605.3  | 608    | 2.71 |  | Del | <i>FHIT</i>  |
| 11947.p1 | chr6 | 1626.9 | 1629.5 | 2.58 |  | Dup | <i>PARK2</i> |
| 12389.p1 | chr6 | 1625.5 | 1628   | 2.5  |  | Dup | <i>PARK2</i> |



## REFERENCES

1. Bailey, J.A., Yavor, A.M., Massa, H.F., Trask, B.J., and Eichler, E.E. (2001). Segmental duplications: organization and impact within the current human genome project assembly. *Genome Res* 11, 1005-1017.
2. Bailey, J.A., Gu, Z., Clark, R.A., Reinert, K., Samonte, R.V., Schwartz, S., Adams, M.D., Myers, E.W., Li, P.W., and Eichler, E.E. (2002). Recent segmental duplications in the human genome. *Science* 297, 1003-1007.
3. Sharp, A.J., Hansen, S., Selzer, R.R., Cheng, Z., Regan, R., Hurst, J.A., Stewart, H., Price, S.M., Blair, E., Hennekam, R.C., et al. (2006). Discovery of previously unidentified genomic disorders from the duplication architecture of the human genome. *Nat Genet* 38, 1038-1042.
4. Girirajan, S., and Eichler, E.E. (2010). Phenotypic variability and genetic susceptibility to genomic disorders. *Hum Mol Genet*.
5. Cooper, G.M., Stone, E.A., Asimenos, G., Green, E.D., Batzoglou, S., and Sidow, A. (2005). Distribution and intensity of constraint in mammalian genomic sequence. *Genome Res* 15, 901-913.
6. Itsara, A., Cooper, G.M., Baker, C., Girirajan, S., Li, J., Absher, D., Krauss, R.M., Myers, R.M., Ridker, P.M., Chasman, D.I., et al. (2009). Population analysis of large copy number variants and hotspots of human genetic disease. *Am J Hum Genet* 84, 148-161.
7. Cooper, G.M., Coe, B.P., Girirajan, S., Rosenfeld, J.A., Vu, T.H., Baker, C., Williams, C., Stalker, H., Hamid, R., Hannig, V., et al. (2011). A copy number variation morbidity map of developmental delay. *Nat Genet* 43, 838-846.
8. Warde-Farley, D., Donaldson, S.L., Comes, O., Zuberi, K., Badrawi, R., Chao, P., Franz, M., Grouios, C., Kazi, F., Lopes, C.T., et al. (2010). The GeneMANIA prediction server: biological network integration for gene prioritization and predicting gene function. *Nucleic Acids Res* 38, W214-220.
